# Supplementary material for: Photocatalytic, site-selective oxidations of carbohydrates
Source: Royal Society of Chemistry journal article supplement (doi:10.1039/d1cc05124e), 2021-01-01

## **Electronic Supplementary Information**

### **Photocatalytic, Site-Selective Oxidation of Carbohydrates**

Daniel J. Gorelik, Victoria Dimakos, Timur Adrianov and Mark S. Taylor\*

Department of Chemistry, University of Toronto  
80 St George Street, Toronto ON, Canada, M5S 3H6

## **Table of Contents**

|                                                                                                     |     |
|-----------------------------------------------------------------------------------------------------|-----|
| General Information .....                                                                           | S5  |
| Materials.....                                                                                      | S5  |
| Instrumentation.....                                                                                | S5  |
| Substrate Synthesis .....                                                                           | S6  |
| Methyl 6-O-(tert-butyldimethylsilyl)- $\alpha$ -D-glucopyranoside (1a) .....                        | S6  |
| Methyl 6-O-(trityl)- $\alpha$ -D-glucopyranoside (1b).....                                          | S6  |
| Methyl 4,6-O-isopropylidene- $\alpha$ -D-glucopyranoside (1c) .....                                 | S6  |
| Methyl 2-deoxy- $\alpha$ -D-glucopyranoside (1d).....                                               | S7  |
| Methyl 4,6-O-isopropylidene- $\beta$ -D-glucopyranoside (1f).....                                   | S7  |
| Octyl $\alpha$ -D-glucopyranoside (1h) .....                                                        | S7  |
| 4,6:4',6'-di-O-isopropylidene- $\alpha,\alpha'$ -trehalose (1i) .....                               | S8  |
| 6,1',6'-tri-O-tertbutyldiphenylsilyl sucrose (1j).....                                              | S8  |
| Cyclohexyl $\alpha$ -L-rhamnopyranoside (1l) .....                                                  | S9  |
| 1,2:3,4-di-O-isopropylidene-6-O- $\alpha$ -L-rhamnopyranosyl- $\alpha$ -D-galactopyranose (1m)..... | S9  |
| Methyl-6-(tert-butyldimethylsilyloxy)- $\alpha$ -D-mannopyranoside (1n) .....                       | S10 |
| Reaction Optimization .....                                                                         | S11 |
| Methyl 6-O-(tert-butyldimethylsilyl)- $\alpha$ -D-glucopyranoside.....                              | S11 |
| Photocatalyst Screen .....                                                                          | S11 |
| Oxidant Screen .....                                                                                | S11 |
| Additive Screen.....                                                                                | S12 |
| Hydrogen Bond Acceptor Screen.....                                                                  | S12 |
| Time Screen .....                                                                                   | S13 |
| Methyl $\alpha$ -D-glucopyranoside .....                                                            | S13 |
| Solvent Screen .....                                                                                | S13 |
| Hydrogen Bond Acceptor Screen:.....                                                                 | S14 |
| Methyl $\alpha$ -L-rhamnopyranoside .....                                                           | S14 |
| Additive Screen.....                                                                                | S14 |
| Diol Activator Screen .....                                                                         | S15 |
| Photocatalyst Screen .....                                                                          | S16 |
| Boron-Quinuclidine Loading Screen.....                                                              | S16 |
| Methyl $\alpha$ -L-rhamnopyranoside (C2 Oxidation) .....                                            | S17 |
| HAT Catalyst Screen .....                                                                           | S17 |

|                                                                                                                                                                                                                   |     |
|-------------------------------------------------------------------------------------------------------------------------------------------------------------------------------------------------------------------|-----|
| TBADT Loading .....                                                                                                                                                                                               | S18 |
| Boronic Acid Loading .....                                                                                                                                                                                        | S18 |
| Concentration Screen .....                                                                                                                                                                                        | S18 |
| Time Screen .....                                                                                                                                                                                                 | S19 |
| Control Experiments.....                                                                                                                                                                                          | S20 |
| Methyl 6-O-(tert-butyldimethylsilyl)- $\alpha$ -D-glucopyranoside.....                                                                                                                                            | S20 |
| Methyl $\alpha$ -L-rhamnopyranoside .....                                                                                                                                                                         | S20 |
| Product Characterization.....                                                                                                                                                                                     | S21 |
| (6-O-tert-butyldimethylsilyl)-methyl- $\alpha$ -D-ribo-hexapyranoside-3-ulose (2a) .....                                                                                                                          | S23 |
| (6-O-trityl)-methyl- $\alpha$ -D-ribo-hexapyranoside-3-ulose (2b) .....                                                                                                                                           | S24 |
| (4aR,6S,7S,8aR)-7-hydroxy-6-methoxy-2,2-dimethyltetrahydropyrano[3,2-d][1,3]dioxin-8(4H)-one (2c) .....                                                                                                           | S24 |
| Methyl-2-deoxy- $\alpha$ -D-erythro-hexopyranosid-3-ulose (2d).....                                                                                                                                               | S25 |
| Methyl $\alpha$ -D-xylo-hexopyranosid-3-ulose (2e) .....                                                                                                                                                          | S25 |
| (4aR,6R,7S,8aR)-7-hydroxy-6-methoxy-2,2-dimethyltetrahydropyrano[3,2-d][1,3]dioxin-8(4H)-one (2f).....                                                                                                            | S26 |
| (2R,3R,5S,6S)-2-(acetoxymethyl)-6-methoxy-4-oxotetrahydro-2H-pyran-3,5-diyl diacetate (2g) .....                                                                                                                  | S26 |
| (2R,3R,5S,6S)-2-(acetoxymethyl)-6-octyloxy-4-oxotetrahydro-2H-pyran-3,5-diyl diacetate (2h) .....                                                                                                                 | S27 |
| (6R,7S)-7-hydroxy-6-(((4aR,6R,7S,8aR)-7-hydroxy-2,2-dimethyl-8-oxohexahydropyrano[3,2-d][1,3]dioxin-6-yl)oxy)-2,2-dimethyltetrahydropyrano[3,2-d][1,3]dioxin-8(4H)-one (2i) .....                                 | S28 |
| (2R,3S,5R,6R)-2-(((2S,3S,4S,5R)-2,5-bis(((tert-butylidiphenylsilyl)oxy)methyl)-3,4-dihydroxytetrahydrofuran-2-yl)oxy)-6-(((tert-butylidiphenylsilyl)oxy)methyl)-3,5-dihydroxytetrahydro-4H-pyran-4-one (2j) ..... | S28 |
| (2R,3R,5S,6S)-3,5-dihydroxy-2-methoxy-6-methyltetrahydro-4H-pyran-4-one (2k).....                                                                                                                                 | S29 |
| (2R,3R,5S,6S)-2-(cyclohexyloxy)-3,5-dihydroxy-6-methyltetrahydro-4H-pyran-4-one (2l)...                                                                                                                           | S30 |
| (2S,3S,5R,6R)-3,5-dihydroxy-2-methyl-6-(((3aR,5R,5aS,8aS,8bR)-2,2,7,7-tetramethyltetrahydro-5H-bis([1,3]dioxolo)[4,5-b:4',5'-d]pyran-5-yl)methoxy)tetrahydro-4H-pyran-4-one (2m).....                             | S30 |
| (6-O-tert-butyldimethylsilyl)-methyl- $\alpha$ -D-ribo-hexapyranoside-3-ulose (2n) from 1n .....                                                                                                                  | S31 |
| Substrate Limitations.....                                                                                                                                                                                        | S32 |
| $\alpha$ -Galactopyranosides:.....                                                                                                                                                                                | S32 |
| $\beta$ -Galactopyranosides:.....                                                                                                                                                                                 | S33 |
| N-Acetylglucosamine:.....                                                                                                                                                                                         | S33 |
| Glucopyranose: .....                                                                                                                                                                                              | S34 |
| Sucrose: .....                                                                                                                                                                                                    | S34 |

|                  |     |
|------------------|-----|
| References ..... | S35 |
| NMR Files .....  | S36 |

## General Information

### Materials

Stainless steel needles and syringes were used to transfer air and moisture-sensitive liquids. Schlenk flasks were dried at 140 °C for at least 24 hours prior to use. Acetonitrile was HPLC grade and purified using a solvent purification system equipped with columns of activated alumina under nitrogen (Innovative Technology, Inc.). 4 Å molecular sieves were stored for at least 24 hours at 140 °C prior to use. Other reagents and solvents were used without further purification. Flash column chromatography was carried out using neutral silica gel (60 Å, 230–400 mesh, Silicycle). Analytical thin layer chromatography was carried out using aluminum-backed silica gel 60 F254 plates (EMD), and compounds were visualized using UV light and aqueous basic KMnO<sub>4</sub> stain.

### Instrumentation

<sup>1</sup>H and <sup>13</sup>C NMR and 2D NMR spectra were recorded using a Varian Mercury 400 MHz, Bruker Avance III 400 MHz, Agilent DD2 600 (600 MHz), or Agilent DD2-500 (500 MHz) spectrometer equipped with a XSENS cryoprobe. <sup>1</sup>H NMR are reported in parts per million (ppm) relative to tetramethylsilane and referenced to residual protium in the solvent. Spectral features are tabulated in the following order: chemical shift ( $\delta$ , ppm); multiplicity (s-singlet, d-doublet, t-triplet, q-quartet, m-complex multiplet); coupling constant(s) (J, Hz); number of protons; assignment. Assignments were made on the basis of coupling constants and 2D NMR spectra. High-resolution mass spectra (HRMS) were obtained on a JEOL AccuTOF JMS- T1000LC mass spectrometer equipped with a DART (direct analysis in real time) ion source. Infrared (IR) spectra were obtained on a Perkin-Elmer Spectrum 100 instrument equipped with a single-bounce diamond/ZnSe ATR accessory as neat samples, or as thin film from CH<sub>2</sub>Cl<sub>2</sub> as indicated. Spectral features are tabulated as follows: wavenumber (cm<sup>-1</sup>); intensity (br-broad, s-strong, m-medium, w-weak). Specific rotations were measured with a Rudolph Autopol IV digital polarimeter equipped with a sodium lamp source (589 nm) and concentration (c) is reported in g/100 mL. Oxidation reactions were all run in 1 or 2 dram vials and placed approximately 4 inches from a Kessil® LED lamp (either: A160WE Tuna Blue (40 W), H150-Blue (32 W) or PR160L-390nm (52 W)).

## Substrate Synthesis

### Methyl 6-O-(tert-butyldimethylsilyl)- $\alpha$ -D-glucopyranoside (1a)

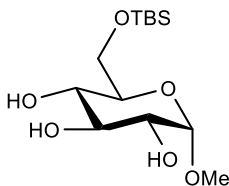

Prepared according to previous literature.<sup>1</sup>

**<sup>1</sup>H NMR** (500 MHz, CDCl<sub>3</sub>):  $\delta$  (ppm) =  $\delta$  4.72 (d,  $J$  = 3.8 Hz, 1H), 4.11 (d,  $J$  = 3.5 Hz, 1H), 3.90 – 3.82 (m, 2H), 3.80 (dd,  $J$  = 11.0, 5.4 Hz, 1H), 3.75 (m, 1H), 3.56 (ddd,  $J$  = 9.3, 5.2, 3.8 Hz, 1H), 3.50 (m, 1H), 3.43 (dd,  $J$  = 9.3, 2.9 Hz, 1H), 3.40 (s, 3H), 0.89 (s, 9H), 0.08 (s, 6H).

**<sup>13</sup>C NMR** (126 MHz, CDCl<sub>3</sub>):  $\delta$  (ppm) =  $\delta$  99.4, 74.5, 72.2, 71.5, 71.5, 63.7, 55.2, 26.0, 18.5, -5.2.

### Methyl 6-O-(trityl)- $\alpha$ -D-glucopyranoside (1b)

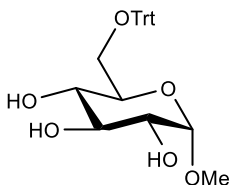

Prepared according to previous literature.<sup>2</sup>

**<sup>1</sup>H NMR** (400 MHz, CD<sub>3</sub>OD):  $\delta$  (ppm) = 7.54 – 7.46 (m, 6H), 7.34 – 7.27 (m, 6H), 7.27 – 7.21 (m, 3H), 4.77 (d,  $J$  = 3.8 Hz, 1H), 3.78 (ddd,  $J$  = 9.9, 6.7, 1.8 Hz, 1H), 3.67 – 3.58 (m, 1H), 3.54 (s, 3H), 3.50 – 3.39 (m, 2H), 3.28 (ddd,  $J$  = 12.2, 10.0, 7.8 Hz, 2H).

**<sup>13</sup>C NMR** (100 MHz, CD<sub>3</sub>OD):  $\delta$  (ppm) = 145.6, 129.9, 128.7, 128.0, 101.1, 87.7, 75.4, 73.6, 72.5, 72.3, 64.9, 55.4,

### Methyl 4,6-O-isopropylidene- $\alpha$ -D-glucopyranoside (1c)

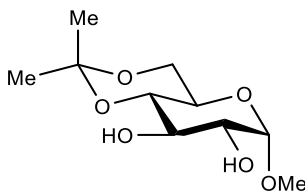

Prepared according to previous literature.<sup>3</sup>

**<sup>1</sup>H NMR** (400 MHz, CDCl<sub>3</sub>): δ (ppm) = 4.74 (d, J = 3.9 Hz, 1H), 3.85 (dd, J = 10.5, 5.2 Hz, 1H), 3.80 – 3.66 (m, 2H), 3.67 – 3.53 (m, 2H), 3.53 – 3.47 (m, 1H), 3.40 (s, 3H), 1.49 (s, 3H), 1.42 (s, 3H).

**<sup>13</sup>C NMR** (100 MHz, CDCl<sub>3</sub>): δ (ppm) = 99.9, 99.9, 73.6, 73.1, 72.1, 63.4, 62.4, 55.5, 29.2, 19.2.

### Methyl 2-deoxy- $\alpha$ -D-glucopyranoside (1d)

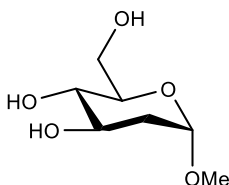

Prepared according to previous literature.<sup>4</sup>

**<sup>1</sup>H NMR** (500 MHz, CD<sub>3</sub>OD): δ (ppm) = 4.79 (d, J = 3.1 Hz, 1H), 3.86 – 3.78 (m, 2H), 3.71 (dd, J = 11.8, 5.6 Hz, 1H), 3.52 – 3.47 (m, 1H), 3.34 (s, 3H), 3.27 – 3.22 (m, 1H), 2.06 (ddd, J = 13.0, 5.1, 1.0 Hz, 1H), 1.61 (ddd, J = 13.0, 11.8, 3.6 Hz, 1H).

**<sup>13</sup>C NMR** (126 MHz, CD<sub>3</sub>OD): δ (ppm) = 99.8, 73.8, 73.3, 69.9, 62.8, 54.9, 38.8.

### Methyl 4,6-O-isopropylidene- $\beta$ -D-glucopyranoside (1f)

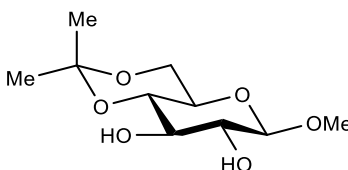

Prepared according to previous literature.<sup>3</sup>

**<sup>1</sup>H NMR** (500 MHz, CDCl<sub>3</sub>): δ (ppm) = δ 4.26 (d, J = 7.7 Hz, 1H), 3.92 (dd, J = 10.8, 5.4 Hz, 1H), 3.81 – 3.74 (m, 1H), 3.69 – 3.61 (m, 1H), 3.58 – 3.52 (m, 4H), 3.45 – 3.38 (m, 1H), 3.38 – 3.33 (m, 1H), 3.30 – 3.22 (m, 2H), 1.50 (s, 3H), 1.43 (s, 3H).

**<sup>13</sup>C NMR** (126 MHz, CDCl<sub>3</sub>): δ (ppm) = δ 104.3, 100.0, 74.7, 73.6, 73.3, 67.3, 62.2, 57.5, 29.1, 19.2.

### Octyl $\alpha$ -D-glucopyranoside (1h)

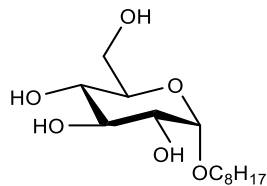

Prepared according to previous literature.<sup>5</sup>

**<sup>1</sup>H NMR** (500 MHz, CD<sub>3</sub>OD): δ (ppm) = 4.79 (d, J = 3.8 Hz, 1H), 3.81 (dd, J = 11.8, 2.4 Hz, 1H), 3.78 – 3.72 (m, 1H), 3.72 – 3.62 (m, 2H), 3.59 (ddd, J = 9.9, 5.5, 2.4 Hz, 1H), 3.49 – 3.43 (m, 1H), 3.40 (dd, J = 9.7, 3.8 Hz, 1H), 3.35 – 3.27 (m, 1H), 1.73 – 1.56 (m, 2H), 1.47 – 1.23 (m, 10H), 0.96 – 0.88 (m, 3H).

**<sup>13</sup>C NMR** (126 MHz, CD<sub>3</sub>OD): δ (ppm) = 100.1, 75.1, 73.6, 73.6, 71.8, 69.1, 62.7, 33.0, 30.6, 30.6, 30.4, 27.3, 23.7, 14.4.

### 4,6:4',6'-di-O-isopropylidene- $\alpha,\alpha'$ -trehalose (1i)

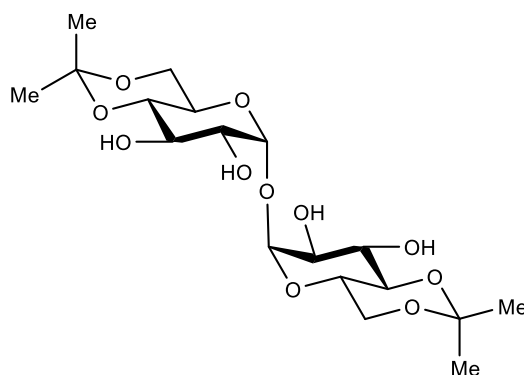

Prepared according to previous literature.<sup>6</sup>

**<sup>1</sup>H NMR** (400 MHz, CD<sub>3</sub>CN): δ (ppm) = 5.01 (d, J = 3.8 Hz, 2H), 3.81 – 3.65 (m, 8H), 3.65 – 3.54 (m, 4H), 3.53 – 3.45 (m, 4H), 1.46 (s, 6H), 1.35 (s, 6H).

**<sup>13</sup>C NMR** (100 MHz, CD<sub>3</sub>CN): δ (ppm) = 100.3, 95.5, 74.7, 73.6, 71.7, 64.8, 63.0, 29.6, 19.5.

### 6,1',6'-tri-O-tertbutyldiphenylsilyl sucrose (1j)

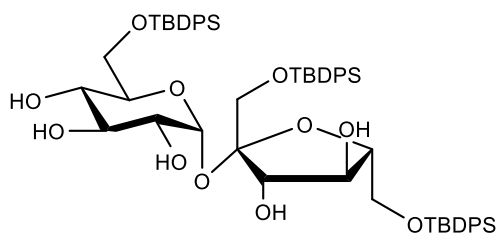



Prepared according to previous literature.<sup>7</sup>

**<sup>1</sup>H NMR** (500 MHz, CD<sub>3</sub>Cl<sub>3</sub>): δ (ppm) = 7.74 – 7.64 (m, 12H), 7.42 – 7.30 (m, 18H), 5.66 (d, J = 4.1 Hz, 1H), 4.27 – 4.15 (m, 2H), 3.92 (ddd, J = 11.3, 6.8, 2.9 Hz, 2H), 3.88 – 3.80 (m, 2H), 3.77 – 3.67 (m, 4H), 3.66 – 3.58 (m, 1H), 3.40 – 3.33 (m, 2H), 1.15 – 0.99 (m, 27H).

**<sup>13</sup>C NMR** (126 MHz, CD<sub>3</sub>Cl<sub>3</sub>): δ (ppm) = 135.8, 135.8, 135.8, 135.7, 135.7, 135.6, 133.3, 133.1, 132.9, 132.9, 132.8, 130.0, 130.0, 130.0, 130.0, 129.9, 128.0, 128.0, 127.9, 127.9, 127.9, 104.8, 91.0, 80.4, 78.3, 74.9, 74.4, 72.3, 71.5, 71.1, 65.8, 64.7, 63.3, 27.0, 27.0, 26.9, 19.4, 19.3, 19.3.

### Cyclohexyl α-L-rhamnopyranoside (1I)

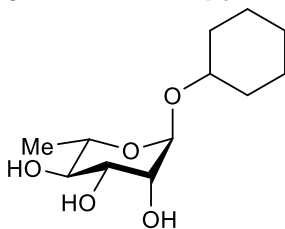

Prepared according to previous literature.<sup>8</sup>

**<sup>1</sup>H NMR** (400 MHz, CD<sub>3</sub>OD): δ (ppm) = 4.82 (d, J = 1.7 Hz, 1H), 3.75 (dd, J = 3.3, 1.7 Hz, 1H), 3.70 – 3.63 (m, 2H), 3.63 – 3.54 (m, 1H), 3.39 – 3.33 (m, 1H), 1.94 – 1.79 (m, 2H), 1.79 – 1.65 (m, 2H), 1.59 – 1.47 (m, 1H), 1.46 – 1.17 (m, 8H).

**<sup>13</sup>C NMR** (100 MHz, CD<sub>3</sub>OD): δ (ppm) = 99.6, 76.1, 74.1, 72.8, 72.4, 69.8, 34.5, 32.5, 26.8, 25.1, 24.8, 17.9.

### 1,2:3,4-di-O-isopropylidene-6-O-α-L-rhamnopyranosyl-α-D-galactopyranose (1m)

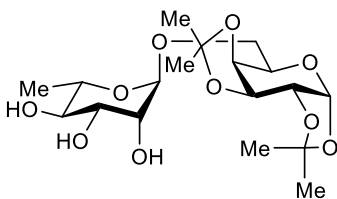

Prepared according to previous literature.<sup>8</sup>

**<sup>1</sup>H NMR** (400 MHz, CD<sub>3</sub>OD): δ (ppm) = 4.66 (dd, J = 7.9, 2.4 Hz, 1H), 4.39 (dd, J = 5.0, 2.4 Hz, 1H), 4.30 (dd, J = 7.9, 1.9 Hz, 1H), 4.05 – 3.97 (m, 1H), 3.90 – 3.81 (m, 2H), 3.75 – 3.61 (m, 2H), 3.54 (dd, J = 10.2, 6.9 Hz, 1H), 1.53 (s, 3H), 1.44 (s, 3H), 1.40 – 1.33 (m, 6H), 1.29 (d, J = 6.2 Hz, 3H).

**<sup>13</sup>C NMR** (100 MHz, CD<sub>3</sub>OD): δ (ppm) = 110.4, 109.9, 101.9, 97.7, 73.9, 72.4, 72.2, 72.0, 72.0, 69.9, 68.5, 67.0, 26.4, 26.4, 25.2, 24.6, 18.0.

**Methyl-6-(tert-butyldimethylsilyloxy)- $\alpha$ -D-mannopyranoside (1n)**

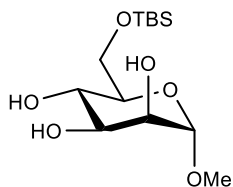

Prepared according to previous literature.<sup>9</sup>

**<sup>1</sup>H NMR** (400 MHz, CD<sub>3</sub>OD):  $\delta$  (ppm) = 4.64 (d, J = 1.6 Hz, 1H), 4.01 (dd, J = 11.1, 1.9 Hz, 1H), 3.84 – 3.76 (m, 2H), 3.67 (dd, J = 8.9, 3.5 Hz, 1H), 3.60 – 3.48 (m, 2H), 3.39 (s, 3H), 0.95 (s, 9H), 0.13 (s, 3H), 0.13 (s, 3H).

**<sup>13</sup>C NMR** (100 MHz, CD<sub>3</sub>OD):  $\delta$  (ppm) = 102.6, 74.9, 72.8, 72.0, 68.8, 64.6, 55.0, 26.4, 19.2, -5.1.

## Reaction Optimization

### Methyl 6-O-(tert-butyldimethylsilyl)- $\alpha$ -D-glucopyranoside

#### Photocatalyst Screen

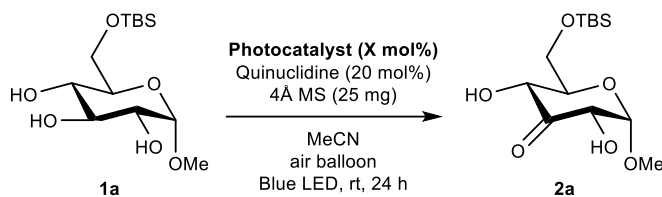

| Photocatalyst                                                     | Loading  | %2a | %1a |
|-------------------------------------------------------------------|----------|-----|-----|
| (Ir[dF(CF <sub>3</sub> )ppy] <sub>2</sub> (dtbpy))PF <sub>6</sub> | 2.5 mol% | 63  | 13  |
| 4-CzIPN                                                           | 5.0 mol% | 51  | 0   |
|                                                                   | 5.0 mol% | 65  | 22  |

#### Oxidant Screen

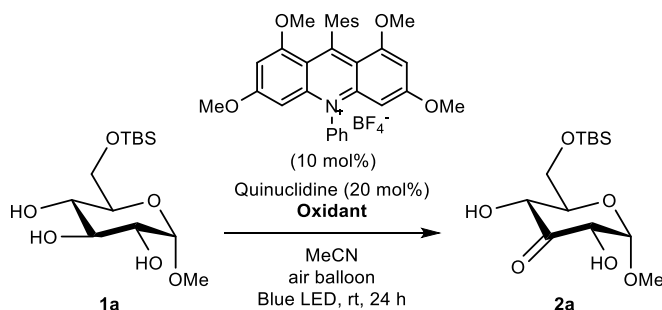

| Oxidant                                      | %2a | %1a | Notes:         |
|----------------------------------------------|-----|-----|----------------|
| None                                         | 38  | 39  |                |
| O <sub>2</sub> balloon (instead of air)      | 27  | 64  |                |
| Selectfluor (1.0 equiv.)                     | 9   | 90  |                |
| DMSO (10:1 MeCN:DMSO)                        | -   | -   | over-oxidation |
| K <sub>2</sub> S <sub>2</sub> O (1.0 equiv.) | -   | -   | over-oxidation |

## Additive Screen

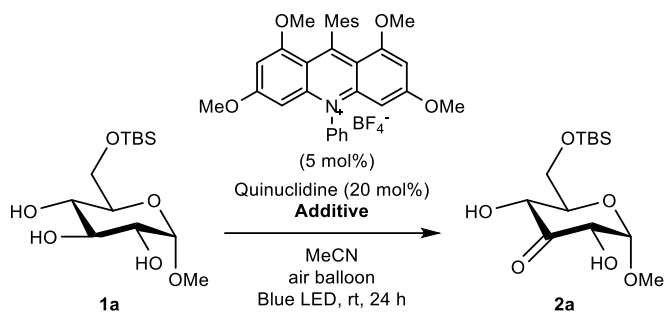

| Additive                     | %2a | %1a |
|------------------------------|-----|-----|
| None                         | 40  | 40  |
| 4Å MS (powder, 25 mg)        | 65  | 22  |
| 4Å MS (powder, 50 mg)        | 47  | 38  |
| 4Å MS (beads, 25 mg)         | 46  | 37  |
| MnO <sub>2</sub> (0.2 equiv) | 54  | 0   |
| KI (0.2 equiv)               | <5  | 91  |

## Hydrogen Bond Acceptor Screen

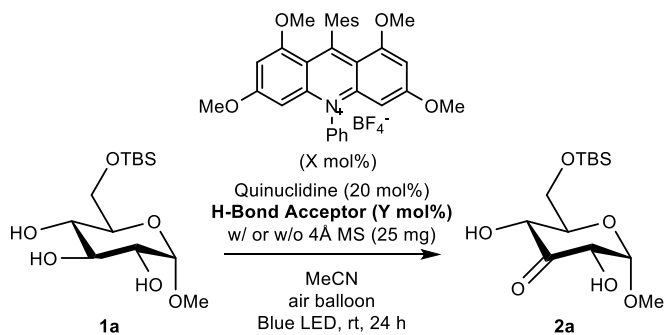

| Photocatalyst Loading | Acceptor (Y mol%)                                         | 4Å MS? | %2a | %1a |
|-----------------------|-----------------------------------------------------------|--------|-----|-----|
| 10 mol%               | None                                                      | No     | 38  | 39  |
|                       | Bu <sub>4</sub> NH <sub>2</sub> PO <sub>4</sub> (25 mol%) |        | 30  | 41  |
|                       | Bu <sub>4</sub> NOBz (25 mol%)                            |        | 27  | 40  |
| 5 mol%                | None                                                      | Yes    | 65  | 22  |
|                       | Bu <sub>4</sub> NOPO(OBu) <sub>2</sub> (25 mol%)          |        | 62  | 15  |

## Time Screen

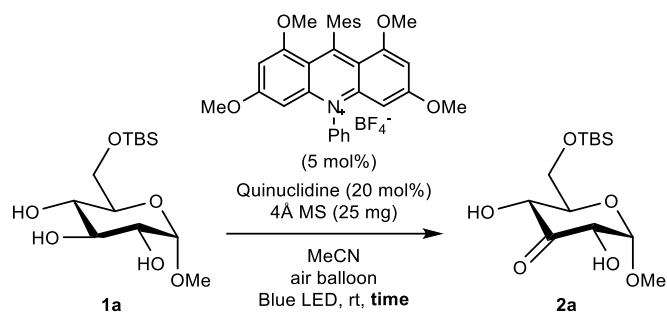

| Time (h) | %2a | %1a |
|----------|-----|-----|
| 24       | 65  | 22  |
| 48       | 67  | 11  |

## Methyl $\alpha$ -D-glucopyranoside

## Solvent Screen

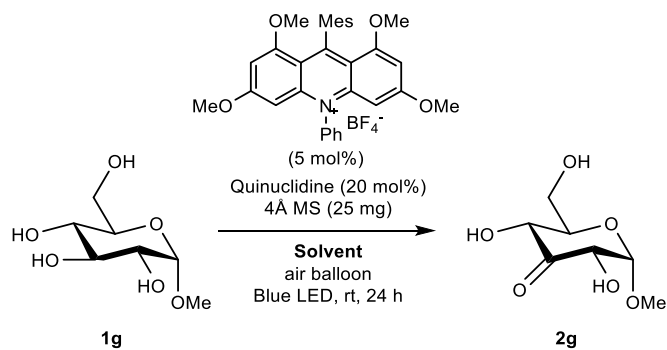

| Solvent                      | %2g | %1g |
|------------------------------|-----|-----|
| MeCN                         | 16  | 58  |
| DMSO                         | 30  | 52  |
| MeCN:DMSO (10:1)             | 33  | 48  |
| MeCN:DMSO (4:1)              | 40  | 30  |
| MeCN:DMSO (1:1)              | 32  | 47  |
| MeCN:H <sub>2</sub> O (10:1) | 11  | 51  |
| MeCN:MeOH (10:1)             | 20  | 64  |
| MeCN:TFE (10:1)              | 21  | 60  |



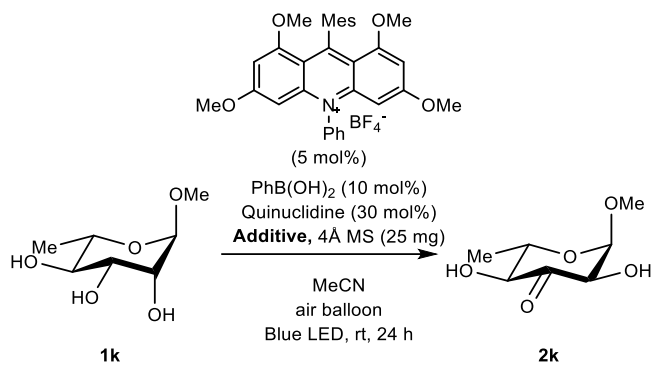

| Additive                                                        | %2k | % 1k |
|-----------------------------------------------------------------|-----|------|
| None                                                            | 28  | 28   |
| Phthalimide (20 mol%)                                           | 22  | 35   |
| (CH <sub>3</sub> ) <sub>3</sub> CCO <sub>2</sub> H (1.0 equiv.) | 36  | 25   |
| TsOH•H <sub>2</sub> O (1.0 equiv.)                              | 11  | 86   |
| Bu <sub>3</sub> PO (30 mol%)                                    | 18  | 24   |
| Pyridine-N-oxide (30 mol%)                                      | 11  | 16   |

### Diol Activator Screen

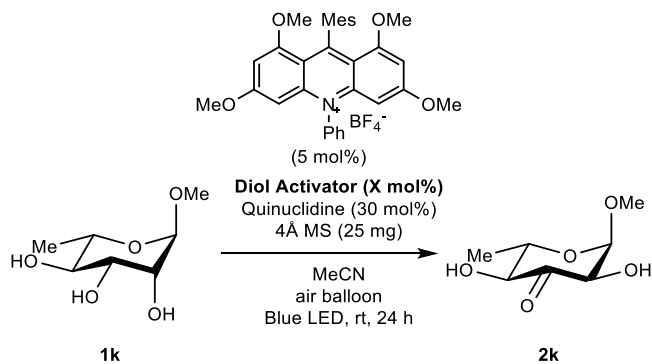

| Additive                                                                      | %2k |
|-------------------------------------------------------------------------------|-----|
| PhB(OH) <sub>2</sub> (10 mol%)                                                | 22  |
| Ph <sub>2</sub> SnCl <sub>2</sub> (10 mol%)<br>+ 1.5 equiv. KHCO <sub>3</sub> | 31  |
| (Ph <sub>2</sub> B) <sub>2</sub> O (5 mol%)                                   | 10  |
| 2-CPBA•2H <sub>2</sub> O (10 mol%)                                            | 52  |

## Photocatalyst Screen

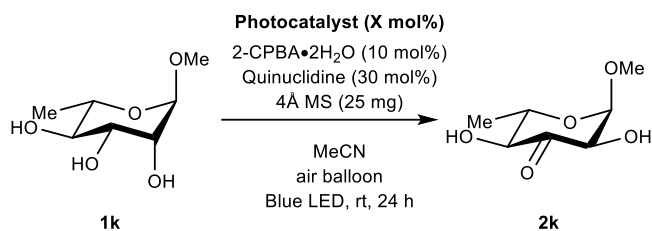

| Photocatalyst (X mol%)                                                       | %2k | %1k |
|------------------------------------------------------------------------------|-----|-----|
| (Ir[dF(CF <sub>3</sub> )ppy] <sub>2</sub> (dtbpy))PF <sub>6</sub> (2.0 mol%) | 27  | 27  |
| 4-CzIPN (5 mol%)                                                             | 32  | 15  |
| <br>(5 mol%)                                                                 | 52  | 11  |
| <br>(5 mol%)                                                                 | 53  | 7   |

## Boron-Quinuclidine Loading Screen

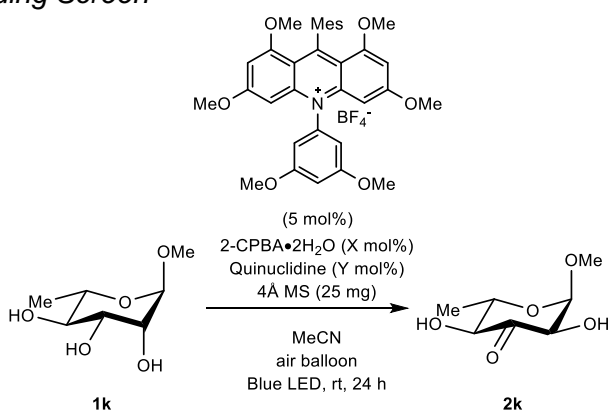

|                     |    | 2-CPBA•2H <sub>2</sub> O (mol%) |    |
|---------------------|----|---------------------------------|----|
|                     |    | 10                              | 20 |
| Quinuclidine (mol%) | 20 | 21                              |    |
|                     | 30 | 53                              | 48 |
|                     | 40 | 57                              | 48 |



## Methyl $\alpha$ -L-rhamnopyranoside (C2 Oxidation)

### HAT Catalyst Screen

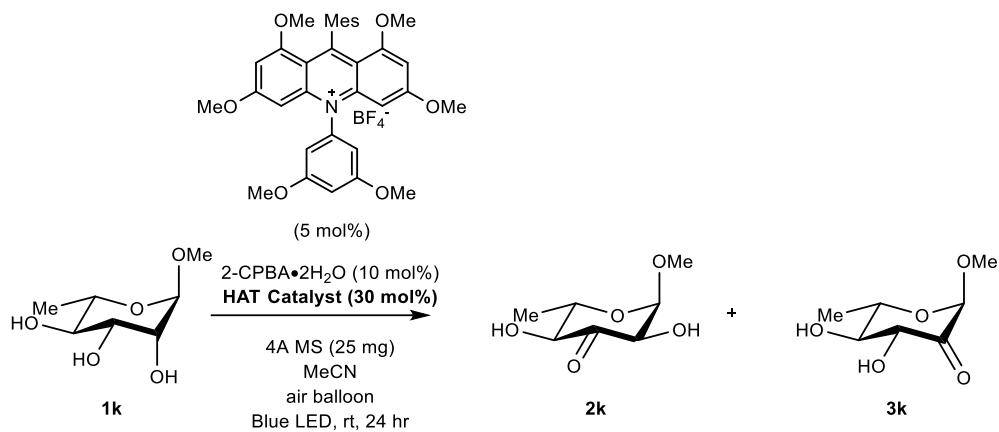

| HAT Catalyst                                                                        | % 2k | %3k | %1k |
|-------------------------------------------------------------------------------------|------|-----|-----|
|    | 51   | 0   | 11  |
|   | 0    | 8   | 81  |
|  | 35   | 4   | 22  |
|  | 17   | 0   | 60  |
|  | 13   | 0   | 51  |
|  | 0    | 0   | 95  |
|  | 0    | 0   | 76  |
|  | 0    | 0   | 83  |
|  | 0    | 0   | 85  |

### TBADT Loading

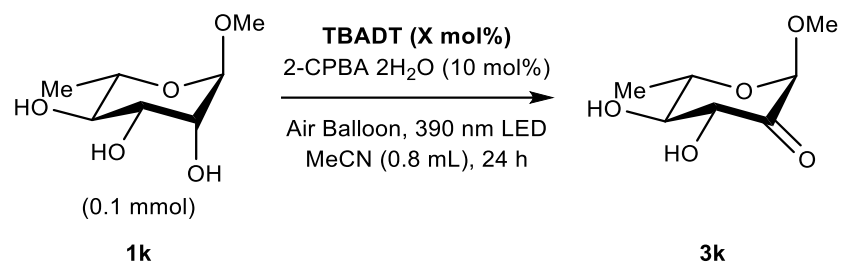

| TBADT (X mol%) | %3k | %1k |
|----------------|-----|-----|
| 5              | 17  | 0   |
| 4.5            | 21  | 17  |
| 3.5            | 34  | 20  |
| 2.5            | 30  | 26  |

### Boronic Acid Loading

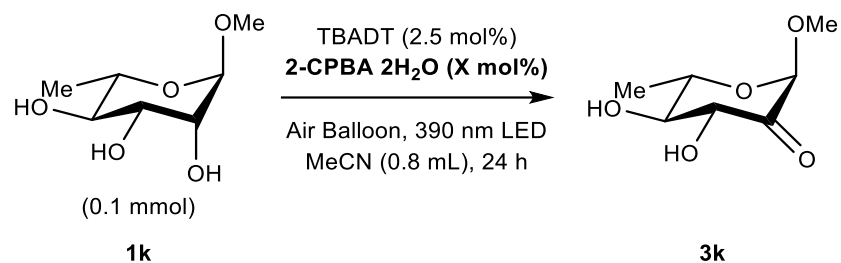

| 2-CPBA 2H <sub>2</sub> O (X mol%) | %3k | %1k |
|-----------------------------------|-----|-----|
| 5                                 | 27  | 28  |
| 10                                | 30  | 26  |
| 20                                | 20  | 29  |

### Concentration Screen

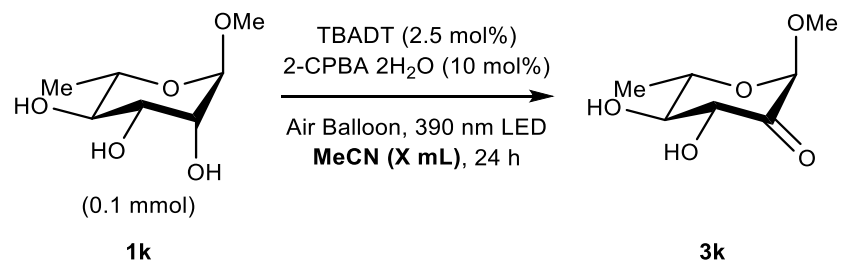

| MeCN (X mL) | %3k | %1k |
|-------------|-----|-----|
| 0.4         | 20  | 22  |
| 0.8         | 30  | 26  |

|     |    |    |
|-----|----|----|
| 1.6 | 28 | 29 |
|-----|----|----|

*Time Screen*

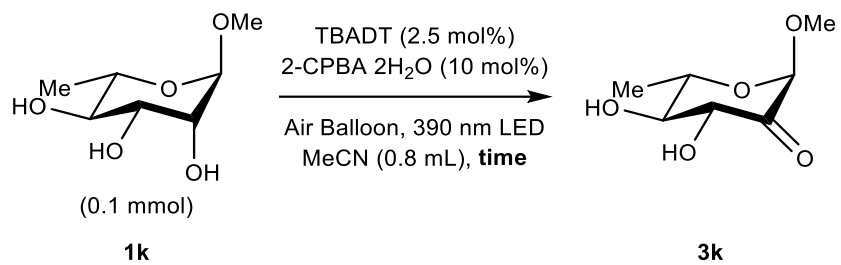

| Time (h) | %3k | %1k |
|----------|-----|-----|
| 2        | 15  | 66  |
| 6        | 17  | 55  |
| 13       | 24  | 40  |
| 24       | 30  | 26  |
| 30       | 29  | 21  |
| 48       | 28  | 7   |

## Control Experiments

### Methyl 6-O-(tert-butyldimethylsilyl)- $\alpha$ -D-glucopyranoside

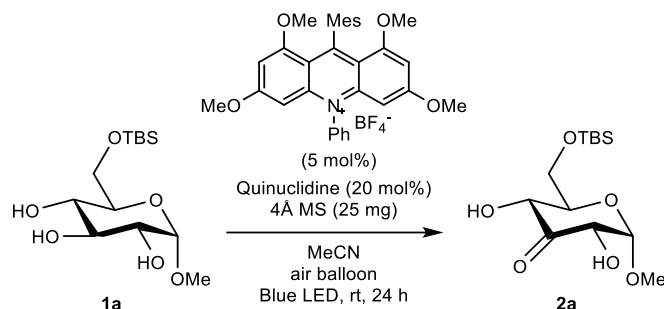

| Changes to Above Conditions: | %2a |
|------------------------------|-----|
| None                         | 65  |
| No Photocatalyst             | <5  |
| No Quinuclidine              | <5  |
| No MS                        | 40  |
| No Blue Light                | <5  |

### Methyl $\alpha$ -L-rhamnopyranoside

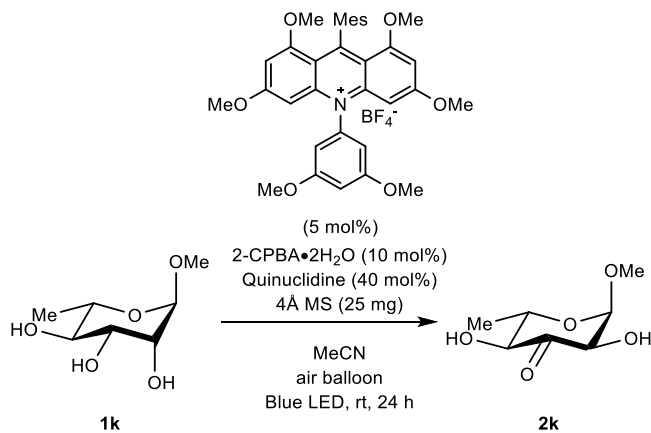

| Changes to Above Conditions: | %2k |
|------------------------------|-----|
| None                         | 57  |
| No Photocatalyst             | <5  |
| No 2-CPBA•2H <sub>2</sub> O  | <5  |
| No Quinuclidine              | <5  |
| No MS                        | 26  |
| No Blue Light                | <5  |

## Product Characterization

### **General Procedure A:**

Carbohydrate (0.2 mmol, 1.0 equiv.), acridinium photocatalyst (0.01 mmol, 0.05 equiv.), quinuclidine (4.4 mg, 0.04 mmol, 0.2 equiv.), 4Å molecular sieves (powder, 25 mg) and a small, magnetic stir bar were transferred to a 2-dram vial. The vial was sealed with a rubber septum and an air balloon was inserted into it. 1.6 mL of anhydrous acetonitrile was transferred into the vial and the solution was sonicated for 5 seconds. Subsequently, the vial was placed 4 inches from a blue LED Kessil lamp and stirred at 1050 rpm (the temperature under the light was monitored and remained at ~25 °C throughout the course of the reaction) for 24 – 48 hours. After 16 hours, a needle was inserted into the septum and the vial was flushed with air from the balloon for 10 seconds. The needle was then removed. After 24 – 48 hours, the crude mixture was diluted with acetonitrile, filtered through a small celite plug and the filtrate was concentrated under reduced pressure. Following <sup>1</sup>H NMR analysis, the crude material was subjected to flash chromatography on silica gel.

### **General Procedure B:**

Carbohydrate (0.2 mmol, 1.0 equiv.), acridinium photocatalyst (0.01 mmol, 0.05 equiv.), NBu<sub>4</sub>OPO(OBu)<sub>2</sub> (22.6 mg, 0.05 mmol, 0.25 equiv.), quinuclidine (4.4 mg, 0.04 mmol, 0.2 equiv.), 4Å molecular sieves (powder, 25 mg) and a small, magnetic stir bar were transferred to a 2-dram vial. The vial was sealed with a rubber septum and an air balloon was inserted into it. 1.6 mL of anhydrous acetonitrile was transferred into the vial and the solution was sonicated for 5 seconds. Subsequently, the vial was placed 4 inches from a blue LED Kessil lamp and stirred at 1050 rpm (the temperature under the light was monitored and remained at ~25 °C throughout the course of the reaction) for 24 – 48 hours. After 16 hours, a needle was inserted into the septum and the vial was flushed with air from the balloon for 10 seconds. The needle was then removed. After 24 – 48 hours, the crude mixture was diluted with acetonitrile, filtered through a small celite plug and the filtrate was concentrated under reduced pressure. Following <sup>1</sup>H NMR analysis, the crude material was subjected to flash chromatography on silica gel.

### **General Procedure C:**

Carbohydrate (0.2 mmol, 1.0 equiv.), acridinium photocatalyst (0.01 mmol, 0.05 equiv.), NBu<sub>4</sub>OPO(OBu)<sub>2</sub> (22.6 mg, 0.05 mmol, 0.25 equiv.), quinuclidine (4.4 mg, 0.04 mmol, 0.2 equiv.), 4Å molecular sieves (powder, 25 mg) and a small, magnetic stir bar were transferred to a 2-dram vial. The vial was sealed with a rubber septum and an air balloon was inserted into it. 1.6 mL of anhydrous acetonitrile and 0.16 mL of anhydrous dimethyl sulfoxide were transferred into the vial and the solution was sonicated for 5 seconds. Subsequently, the vial was placed 4 inches from a blue LED Kessil lamp and stirred at 1050 rpm (the temperature under the light was monitored and remained at ~25 °C throughout the course of the reaction) for 24 – 48 hours. After 16 hours, a needle was inserted into the septum and the vial was flushed with air from the balloon for 10 seconds. The needle was then removed. After 24 – 48 hours, the crude mixture was diluted with acetonitrile, filtered through a small celite plug and the filtrate was concentrated under reduced pressure. Following <sup>1</sup>H NMR analysis, the crude material was peracylated using acetic anhydride (2.5 equiv./hydroxyl group) and pyridine (3 mL). After quenching the reaction mixture with methanol and azeotropic removal of pyridine using toluene, the crude material was subjected to flash chromatography on silica gel.

#### **General Procedure D:**

Carbohydrate (0.2 mmol, 1.0 equiv.), acridinium photocatalyst (0.01 mmol, 0.05 equiv.), 2-carboxyphenylboronic acid dihydrate (4.0 mg, 0.02 mmol, 0.1 equiv.), quinuclidine (8.8 mg, 0.08 mmol, 0.4 equiv.), 4Å molecular sieves (powder, 25 mg) and a small, magnetic stir bar were transferred to a 2-dram vial. The vial was sealed with a rubber septum and an air balloon was inserted into it. 1.6 mL of anhydrous acetonitrile was transferred into the vial and the solution was sonicated for 5 seconds. Subsequently, the vial was placed 4 inches from a blue LED Kessil lamp and stirred at 1050 rpm (the temperature under the light was monitored and remained at ~25 °C throughout the course of the reaction) for 24 hours. After 16 hours, a needle was inserted into the septum and the vial was flushed with air from the balloon for 10 seconds. The needle was then removed. After 24 hours, the crude mixture was diluted with acetonitrile, filtered through a small celite plug and the filtrate was concentrated under reduced pressure. Following <sup>1</sup>H NMR analysis, the crude material was subjected to flash chromatography on silica gel.

## (6-O-tert-butyldimethylsilyl)-methyl- $\alpha$ -D-ribo-hexapyranoside-3-ulose (**2a**)

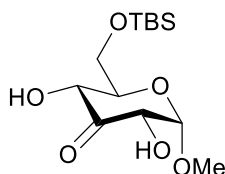

Prepared according to **General Procedure A** (24 hours) from **1a** (61.6 mg, 0.2 mmol, 1 equiv.). **2a** was obtained as a white solid (39.2 mg, 64%) after flash chromatography on silica gel (25% to 55% ethyl acetate in hexanes).

**<sup>1</sup>H NMR** (500 MHz, CD<sub>3</sub>CN):  $\delta$  (ppm) = 5.03 (d,  $J$  = 4.3 Hz, 1H, H1), 4.34 (ddd,  $J$  = 8.4, 4.3, 1.6 Hz, 1H, H2), 4.23 (ddd,  $J$  = 9.7, 5.3, 1.6 Hz, 1H, H4), 3.97 – 3.82 (m, 2H, H6<sub>a</sub>, H6<sub>b</sub>), 3.65 (d,  $J$  = 5.3 Hz, 1H, OH), 3.56 – 3.49 (m, 2H, H5, OH), 3.34 (s, 3H, OCH<sub>3</sub>), 0.91 (s, 9H, CH<sub>3</sub>), 0.10 (s, 6H, CH<sub>3</sub>).

**<sup>13</sup>C NMR** (126 MHz, CD<sub>3</sub>CN):  $\delta$  (ppm) = 207.3 (C3), 103.3 (C1), 76.7 (C5), 75.8 (C2), 72.9 (C4), 63.4 (C6), 55.7 (OCH<sub>3</sub>), 26.2 (CH<sub>3</sub>), 19.0 (C(CH<sub>3</sub>)<sub>3</sub>), -5.0 (CH<sub>3</sub>), -5.2 (CH<sub>3</sub>).

**IR (thin film, cm<sup>-1</sup>):** 3493 (w), 3401 (w), 2953 (w), 2931 (w), 2856 (w), 1738 (s), 1478 (w), 1461 (w), 1393 (w), 1249 (m), 1129 (m), 1113 (m), 1055 (s), 997 (m), 829 (s), 785 (s).

**HRMS** (DART<sup>+</sup>,  $m/z$ ): calculated for C<sub>13</sub>H<sub>27</sub>O<sub>6</sub>Si [M+H]<sup>+</sup>: 307.1571, found 307.1567.

### 1.0 mmol scale reaction with 4-CzIPN:

*Due to unforeseen shortages in the commercial supply of acridinium photocatalysts, 4-CzIPN was used as the photocatalyst for large scale reactions. Yields are expected to be 5% to 10% higher with the acridinium photocatalysts.*

**1a** (308.4 mg, 1.0 mmol, 1.0 equiv.), 4-CzIPN (39.4 mg, 0.05 mmol, 0.05 equiv.), quinuclidine (22.2 mg, 0.2 mmol, 0.2 equiv.), 4Å molecular sieves (powder, 50 mg) and a magnetic stir bar were transferred to a 10-dram vial. The vial was sealed with a rubber septum and an air balloon was inserted into it. 8.0 mL of anhydrous acetonitrile was transferred into the vial and the solution was sonicated for 5 seconds. Subsequently, the vial was placed 4 inches from two blue LED Kessil lamp and stirred at 1050 rpm (the temperature under the light was monitored and remained at ~25 °C throughout the course of the reaction) for 36 hours. After 16 hours, a needle was inserted into the septum and the vial was flushed with air from the balloon for 20 seconds. The needle was then removed. After 36 hours, the crude mixture was diluted with acetonitrile, filtered through a celite plug and the filtrate was concentrated under reduced pressure. After flash chromatography on silica gel (25% to 55% ethyl acetate in hexanes), **2a** was obtained as a pale-yellow solid (159.5 mg, 52%).

**(6-O-trityl)-methyl- $\alpha$ -D-ribo-hexapyranoside-3-ulose (2b)**

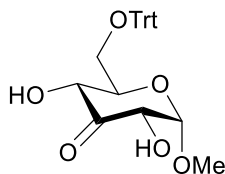

Prepared according to **General Procedure A** (24 hours) from **1b** (87.2 mg, 0.2 mmol, 1 equiv.). **2b** was obtained as a white solid (47.6 mg, 55%) after flash chromatography on silica gel (25% to 55% ethyl acetate in hexanes).

**$^1\text{H NMR}$**  (500 MHz,  $\text{CD}_3\text{CN}$ ):  $\delta$  (ppm) = 7.55 – 7.45 (m, 6H,  $\text{H}_{\text{Ar}}$ ), 7.38 – 7.31 (m, 6H,  $\text{H}_{\text{Ar}}$ ), 7.31 – 7.25 (m, 3H,  $\text{H}_{\text{Ar}}$ ), 5.12 (d,  $J$  = 4.7 Hz, 1H, H1), 4.45 (ddd,  $J$  = 8.1, 4.3, 1.4 Hz, 1H, H2), 4.29 (ddd,  $J$  = 9.8, 5.2, 1.5 Hz, 1H, H4), 3.78 – 3.71 (m, 1H, H5), 3.62 (d,  $J$  = 5.4 Hz, 1H, OH), 3.57 (d,  $J$  = 8.4 Hz, 1H, OH), 3.42 (s, 3H,  $\text{OCH}_3$ ), 3.37 (dd,  $J$  = 10.2, 1.9 Hz, 1H,  $\text{H6}_a$ ), 3.32 (dd,  $J$  = 10.2, 5.6 Hz, 1H,  $\text{H6}_b$ ).

**$^{13}\text{C NMR}$**  (126 MHz,  $\text{CD}_3\text{CN}$ ):  $\delta$  (ppm) = 206.9 (C3), 145.0 ( $\text{C}_{\text{Ar}}$ ), 129.6 ( $\text{C}_{\text{Ar}}$ ), 128.9 ( $\text{C}_{\text{Ar}}$ ), 128.2 ( $\text{C}_{\text{Ar}}$ ), 103.2 (C1), 87.4 (C( $\text{Ph}$ )<sub>3</sub>), 75.9 (C2), 75.3 (C5), 73.6 (C4), 64.4 (C6), 55.8 ( $\text{OCH}_3$ ).

**IR (thin film,  $\text{cm}^{-1}$ ):** 3435 (w, br), 2927 (w), 1732 (s), 1491 (m), 1447 (s), 1220 (w), 1186 (w), 1118 (s), 1045 (s), 900 (w), 873 (w), 764 (s), 701 (s), 631 (s).

**HRMS (DART<sup>+</sup>,  $m/z$ ):** calculated for  $\text{C}_{26}\text{H}_{26}\text{NaO}_6$  [ $\text{M}+\text{Na}$ ]<sup>+</sup>: 457.1622, found 457.1625.

**(4aR,6S,7S,8aR)-7-hydroxy-6-methoxy-2,2-dimethyltetrahydropyrano[3,2-d][1,3]dioxin-8(4H)-one (2c)**

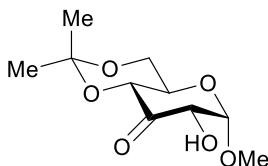

Prepared according to **General Procedure B** (48 hours) from **1c** (46.8 mg, 0.2 mmol, 1 equiv.). **2c** was obtained as a white solid (27.6 mg, 60%) after flash chromatography on silica gel (60% to 80% ethyl acetate in hexanes).

**$^1\text{H NMR}$**  (500 MHz,  $\text{CDCl}_3$ ):  $\delta$  (ppm) = 5.11 (d,  $J$  = 4.4 Hz, 1H, H1), 4.42 – 4.27 (m, 2H, H2, H4), 4.00 – 3.91 (m, 2H,  $\text{H6}_a$ ,  $\text{H6}_b$ ), 3.88 – 3.82 (m, 1H, H5), 3.40 (s, 3H,  $\text{OCH}_3$ ), 1.50 (s, 3H,  $\text{CH}_3$ ), 1.48 (s, 3H,  $\text{CH}_3$ ).



**<sup>13</sup>C NMR** (126 MHz, CDCl<sub>3</sub>): δ (ppm) = 199.6 (C3), 103.5 (C1), 100.5 (C(CH<sub>3</sub>)<sub>2</sub>), 75.7 (C4), 75.0 (C2), 66.8 (C5), 62.9 (C6), 55.8 (OCH<sub>3</sub>), 28.9 (CH<sub>3</sub>), 18.9 (CH<sub>3</sub>).

**IR (thin film, cm<sup>-1</sup>):** 3439 (w, br), 2939 (w), 1743 (s), 1458 (w), 1379 (w), 1354 (w), 1261 (w), 1190 (m), 1162 (m), 1120 (m), 1040 (s), 966 (s), 956 (s), 882 (m), 829 (m), 730 (w), 646 (w).

**HRMS (DART<sup>+</sup>, m/z):** calculated for C<sub>10</sub>H<sub>17</sub>O<sub>6</sub> [M+H]<sup>+</sup>: 233.1019, found 233.1017.

### Methyl-2-deoxy-α-D-erythro-hexopyranosid-3-ulose (2d)

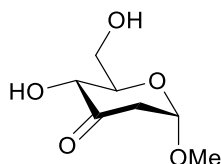

Prepared according to **General Procedure B** (48 hours) from **1d** (35.6 mg, 0.2 mmol, 1 equiv.). **2d** was obtained as a white solid (19.6 mg, 56%) after flash chromatography on silica gel (60% to 90% ethyl acetate in hexanes). Spectral features match with previous literature.<sup>10</sup>

**<sup>1</sup>H NMR** (500 MHz, CD<sub>3</sub>OD): δ (ppm) = 5.22 (d, *J* = 4.2 Hz, 1H), 4.26 (dd, *J* = 9.9, 1.0 Hz, 1H), 3.92 (m, 2H), 3.80 – 3.72 (m, 1H), 3.42 (s, 3H), 2.97 (ddd, *J* = 14.1, 4.5, 1.3 Hz, 1H), 2.57 (dd, *J* = 14.1, 1.1 Hz, 1H).

**<sup>13</sup>C NMR** (126 MHz, CD<sub>3</sub>OD): δ (ppm) = 207.5, 101.1, 76.3, 74.1, 62.6, 55.0, 46.6.

### Methyl α-D-xylo-hexopyranosid-3-ulose (2e)

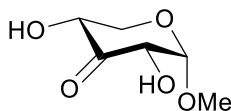

Prepared according to **General Procedure B** (48 hours) from **1e** (32.8 mg, 0.2 mmol, 1 equiv.). **2e** was obtained as a white solid (19.4 mg, 60%) after flash chromatography on silica gel (60% to 90% ethyl acetate in hexanes). Spectral features match with previous literature.<sup>11</sup>

**<sup>1</sup>H NMR** (500 MHz, CD<sub>3</sub>CN): δ (ppm) = 5.00 (d, *J* = 4.2 Hz, 1H), 4.40 – 4.28 (m, 2H), 4.03 (dd, *J* = 10.4, 8.0 Hz, 1H), 3.64 (d, *J* = 5.0 Hz, 1H), 3.54 (d, *J* = 8.4 Hz, 1H), 3.50 – 3.43 (m, 1H), 3.34 (s, 3H).

**<sup>13</sup>C NMR** (126 MHz, CD<sub>3</sub>CN): δ (ppm) = δ 206.9, 104.0, 76.1, 72.9, 65.2, 55.8.

**(4aR,6R,7S,8aR)-7-hydroxy-6-methoxy-2,2-dimethyltetrahydropyrano[3,2-d][1,3]dioxin-8(4H)-one (2f)**

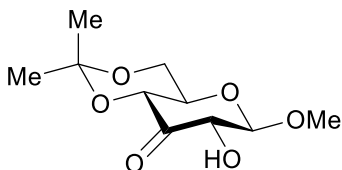

Prepared according to **General Procedure B** (48 hours) from **1f** (46.8 mg, 0.2 mmol, 1 equiv.). A 5:1 mixture of C3 (**2f**):C2 regioisomers were obtained as a colorless oil (22.0 mg, 47%) after flash chromatography on silica gel (60% to 80% ethyl acetate in hexanes).

**<sup>1</sup>H NMR** (500 MHz, CDCl<sub>3</sub>): δ (ppm) = 4.42 (dd, *J* = 10.2, 2.0 Hz, 1H, H4), 4.34 (d, *J* = 7.5 Hz, 1H, H1), 4.13 – 4.10 (m, 1H, H2), 4.07 (dd, *J* = 11.0, 5.4 Hz, 1H, H6<sub>a</sub>), 3.95 (d, *J* = 10.0 Hz, 1H, H6<sub>b</sub>), 3.60 (s, 3H, OCH<sub>3</sub>), 3.40 (ddd, *J* = 10.1, 5.3 Hz, 1H, H5), 1.51 (s, 3H, CH<sub>3</sub>), 1.49 (s, 3H, CH<sub>3</sub>).

**<sup>13</sup>C NMR** (126 MHz, CDCl<sub>3</sub>): δ (ppm) = 199.7 (C3), 107.1 (C1), 100.6 (C(CH<sub>3</sub>)<sub>2</sub>), 77.3 (C2), 75.3 (C4), 67.8 (C5), 62.5 (C6), 57.9 (OCH<sub>3</sub>), 28.8 (CH<sub>3</sub>), 18.8 (CH<sub>3</sub>).

**IR (thin film, cm<sup>-1</sup>):** 3405 (w, br), 2939 (w), 1743 (m), 1455 (w), 1380 (m), 1199 (m), 1124 (m), 1085 (s), 1013 (s), 849 (m), 728 (w).

**HRMS (DART<sup>+</sup>, m/z):** calculated for C<sub>10</sub>H<sub>17</sub>O<sub>6</sub> [M+H]<sup>+</sup>: 233.1019, found 233.1021.

**(2R,3R,5S,6S)-2-(acetoxymethyl)-6-methoxy-4-oxotetrahydro-2H-pyran-3,5-diyl diacetate (2g)**

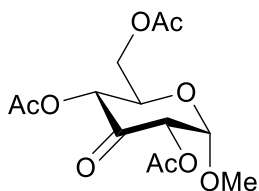

Prepared according to **General Procedure C** (24 hours) from **1g** (38.8 mg, 0.2 mmol, 1 equiv.). **2g** was obtained as a pale-yellow oil (35.6 mg, 56%) after flash chromatography on silica gel (20% to 50% ethyl acetate in hexanes).

**<sup>1</sup>H NMR** (500 MHz, CDCl<sub>3</sub>): δ (ppm) = 5.41 (dd, *J* = 4.1, 1.1 Hz, 1H, H2), 5.30 (dd, *J* = 10.3, 1.1 Hz, 1H, H4), 5.16 (d, *J* = 4.1 Hz, 1H, H1), 4.33 – 4.28 (m, 2H, H6), 4.20 – 4.14 (m, 1H, H5), 3.43 (s, 3H, OCH<sub>3</sub>), 2.17 (s, 3H, CH<sub>3</sub>), 2.14 (s, 3H, CH<sub>3</sub>), 2.10 (s, 3H, CH<sub>3</sub>).

**<sup>13</sup>C NMR** (126 MHz, CDCl<sub>3</sub>): δ (ppm) = 193.0 (C3), 170.6 (Ac C=O), 169.4 (Ac C=O), 168.9 (Ac C=O), 99.9 (C1), 74.7 (C2), 72.2 (C4), 69.7 (C5), 62.2 (C6), 55.8 (OCH<sub>3</sub>), 20.8 (CH<sub>3</sub>), 20.5 (CH<sub>3</sub>), 20.3 (CH<sub>3</sub>).

**IR (thin film, cm<sup>-1</sup>):** 2942 (w), 1740 (s), 1440 (w), 1371 (m), 1218 (s), 1115 (m), 1090 (s), 915 (m), 731 (w), 639 (w).

**HRMS (DART<sup>+</sup>, m/z):** calculated for C<sub>13</sub>H<sub>19</sub>O<sub>9</sub> [M+H]<sup>+</sup>: 319.1024, found 319.1025.

**(2R,3R,5S,6S)-2-(acetoxymethyl)-6-octyloxy-4-oxotetrahydro-2H-pyran-3,5-diyl diacetate (2h)**

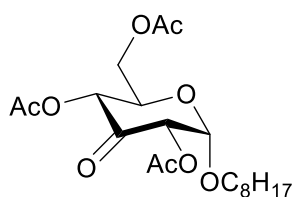

Prepared according to **General Procedure C** (36 hours) from **1h** (58.4 mg, 0.2 mmol, 1 equiv.). **2h** was obtained as a pale-yellow oil (48.8 mg, 54%) after flash chromatography on silica gel (20% to 50% ethyl acetate in hexanes).

**<sup>1</sup>H NMR** (500 MHz, CDCl<sub>3</sub>): δ (ppm) = 5.40 (dd, *J* = 4.2, 1.1 Hz, 1H, H2), 5.29 (dd, *J* = 10.3, 1.1 Hz, 1H, H4), 5.25 (d, *J* = 4.1 Hz, 1H, H1), 4.30 (d, *J* = 3.2 Hz, 2H, H6), 4.23 – 4.18 (m, 1H, H5), 3.72 – 3.65 (m, 1H, CH<sub>a</sub>), 3.52 – 3.46 (m, 1H, CH<sub>b</sub>), 2.17 (s, 3H, CH<sub>3</sub>), 2.15 (s, 3H, CH<sub>3</sub>), 2.10 (s, 3H, CH<sub>3</sub>), 1.61 – 1.54 (m, 2H, CH<sub>2</sub>), 1.30 – 1.22 (m, 10H, CH<sub>2</sub>), 0.88 – 0.84 (m, 3H, CH<sub>3</sub>).

**<sup>13</sup>C NMR** (126 MHz, CDCl<sub>3</sub>): δ (ppm) = 193.2 (C3), 170.6 (Ac C=O), 169.6 (Ac C=O), 169.0 (Ac C=O), 98.8 (C1), 74.8 (C2), 72.3 (C4), 69.7 (C5), 69.2 (CH<sub>2</sub>), 62.3 (C6), 31.9 (CH<sub>2</sub>), 29.3 (CH<sub>2</sub>), 29.3 (CH<sub>2</sub>), 29.2 (CH<sub>2</sub>), 26.0 (CH<sub>2</sub>), 22.7 (CH<sub>2</sub>), 20.8 (CH<sub>3</sub>), 20.5 (CH<sub>3</sub>), 20.4 (CH<sub>3</sub>), 14.2 (CH<sub>3</sub>).

**IR (thin film, cm<sup>-1</sup>):** 2927 (w), 2857 (w), 1745 (s), 1444 (w), 1370 (m), 1220 (s), 1159 (w), 1113 (w), 1066 (s), 1028 (s), 639 (w).

**HRMS (DART<sup>+</sup>, m/z):** calculated for C<sub>20</sub>H<sub>32</sub>NaO<sub>9</sub> [M+Na]<sup>+</sup>: 439.1939, found 439.1947.

**(6R,7S)-7-hydroxy-6-(((4aR,6R,7S,8aR)-7-hydroxy-2,2-dimethyl-8-oxohexahydropyrano[3,2-d][1,3]dioxin-6-yl)oxy)-2,2-dimethyltetrahydropyrano[3,2-d][1,3]dioxin-8(4H)-one (2i)**

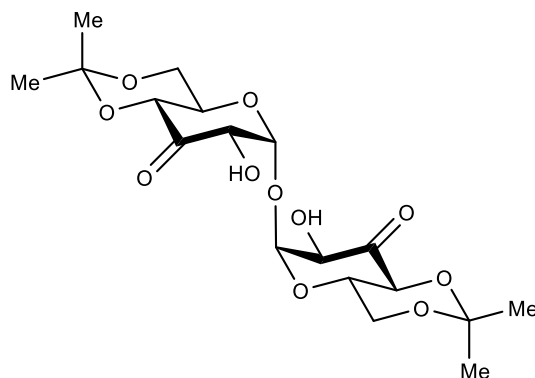

Prepared according to **General Procedure B** (0.1 mmol scale, 48 hours) from **1i** (42.2 mg, 0.1 mmol, 1 equiv.). **2i** was obtained as a colorless solid (14.6 mg, 35%) after flash chromatography on silica gel (70% to 90% ethyl acetate in hexanes).

**<sup>1</sup>H NMR** (500 MHz, CDCl<sub>3</sub>): δ (ppm) = 5.50 (d, *J* = 4.7 Hz, 2H, H1), 4.45 – 4.34 (m, 4H, H2, H4), 4.14 – 4.07 (m, 2H, H5), 3.99 (dd, *J* = 10.6, 5.1 Hz, 2H, H6<sub>a</sub>), 3.90 (t, *J* = 10.4 Hz, 2H, H6<sub>b</sub>), 3.54 (d, *J* = 6.7 Hz, 2H, OH), 1.51 (s, 6H, CH<sub>3</sub>), 1.50 (s, 6H, CH<sub>3</sub>).

**<sup>13</sup>C NMR** (126 MHz, CDCl<sub>3</sub>): δ (ppm) = 199.0 (C3), 100.7 (C(CH<sub>3</sub>)<sub>2</sub>), 98.3 (C1), 75.5 (C4), 74.1 (C2), 67.7 (C5), 62.7 (C6), 28.7 (CH<sub>3</sub>), 19.0 (CH<sub>3</sub>).

**IR (thin film, cm<sup>-1</sup>):** 3480 (w, br), 2929 (w), 1746 (s), 1378 (w), 1261 (w), 1175 (w), 1044 (s), 977 (s), 953 (s), 852 (s), 709 (w).

**HRMS (DART<sup>+</sup>, m/z):** calculated for C<sub>8</sub>H<sub>27</sub>O<sub>11</sub> [M+H]<sup>+</sup>: 419.1548, found 419.1548.

**(2R,3S,5R,6R)-2-(((2S,3S,4S,5R)-2,5-bis(((tert-butyl)diphenylsilyl)oxy)methyl)-3,4-dihydroxytetrahydrofuran-2-yl)oxy)-6-(((tert-butyl)diphenylsilyl)oxy)methyl)-3,5-dihydroxytetrahydro-4H-pyran-4-one (2j)**

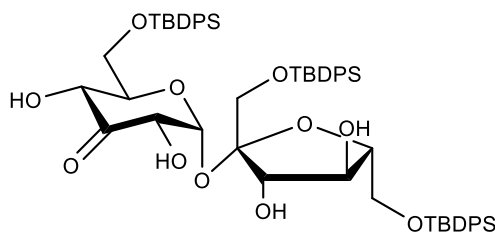

Prepared according to **General Procedure A** (0.1 mmol scale, 48 hours) from **1j** (105.7 mg, 0.1 mmol, 1 equiv.). **2j** was obtained as a colorless solid (41 mg, 39%) after flash chromatography on silica gel (10% to 50% ethyl acetate in hexanes).

**<sup>1</sup>H NMR** (500 MHz, CD<sub>3</sub>CN): δ (ppm) = 7.77 – 7.64 (m, 12H, H<sub>Ar</sub>), 7.47 – 7.29 (m, 18H, H<sub>Ar</sub>), 5.78 (d, *J* = 4.7 Hz, 1H, Gluc-H1), 4.42 (ddd, *J* = 9.7, 5.3, 1.5 Hz, 1H, Gluc-H4), 4.34 – 4.25 (m, 1H, Fruc-CH), 4.13 (ddd, *J* = 8.8, 4.7, 1.6 Hz, 1H, Gluc-H2), 4.02 – 3.93 (m, 2H, Gluc-H5, Fruc-CH), 3.91 – 3.83 (m, 4H, Gluc-H6<sub>a</sub>, Gluc-H6<sub>b</sub>, Fruc-CH, Fruc-CH<sub>a</sub>), 3.79 (dd, *J* = 11.2, 1.7 Hz, 1H, Fruc-CH<sub>b</sub>), 3.72 (d, *J* = 10.8 Hz, 1H, Fruc-CH<sub>a</sub>), 3.67 – 3.60 (m, 2H, OH, Fruc-CH<sub>b</sub>), 3.54 (d, *J* = 8.8 Hz, 1H, OH), 3.39 (d, *J* = 5.5 Hz, 1H, OH), 3.23 (d, *J* = 8.8 Hz, 1H, OH), 1.05 (s, 9H, CH<sub>3</sub>), 1.04 (s, 9H, CH<sub>3</sub>), 1.00 (s, 9H, CH<sub>3</sub>).

**<sup>13</sup>C NMR** (126 MHz, CD<sub>3</sub>CN): δ (ppm) = 207.3 (Gluc-C3), 136.6 (C<sub>Ar</sub>), 136.4 (C<sub>Ar</sub>), 136.4 (C<sub>Ar</sub>), 136.4 (C<sub>Ar</sub>), 136.4 (C<sub>Ar</sub>), 134.4 (C<sub>Ar</sub>), 134.3 (C<sub>Ar</sub>), 134.2 (C<sub>Ar</sub>), 134.2 (C<sub>Ar</sub>), 134.1 (C<sub>Ar</sub>), 133.8 (C<sub>Ar</sub>), 130.9 (C<sub>Ar</sub>), 130.8 (C<sub>Ar</sub>), 130.8 (C<sub>Ar</sub>), 130.8 (C<sub>Ar</sub>), 130.8 (C<sub>Ar</sub>), 128.9 (C<sub>Ar</sub>), 128.8 (C<sub>Ar</sub>), 128.8 (C<sub>Ar</sub>), 128.8 (C<sub>Ar</sub>), 105.7 (Fruc-C), 95.6 (Gluc-C1), 83.2, 77.5 (Fruc-C), 77.3, 75.1, 75.1 (Gluc-H2), 72.7 (Gluc-H4), 65.6, 65.0 (Fruc-CH<sub>2</sub>), 64.1, 27.3 (CH<sub>3</sub>), 27.2 (CH<sub>3</sub>), 27.2 (CH<sub>3</sub>), 19.9 (C(CH<sub>3</sub>)<sub>3</sub>), 19.8 (C(CH<sub>3</sub>)<sub>3</sub>).

**IR (thin film, cm<sup>-1</sup>):** 3450 (w, br), 2911 (w), 1732 (w), 1466 (w), 1427 (m), 1098 (s), 999 (s), 815 (m), 699 (s), 611 (m).

**HRMS (DART<sup>+</sup>, m/z):** calculated for C<sub>60</sub>H<sub>74</sub>NaO<sub>11</sub>Si<sub>3</sub> [M+Na]<sup>+</sup>: 1077.4431, found 1077.4441.

**(2R,3R,5S,6S)-3,5-dihydroxy-2-methoxy-6-methyltetrahydro-4H-pyran-4-one (2k)**

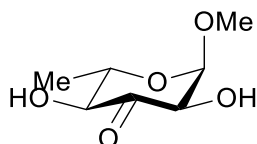

Prepared according to **General Procedure D** from **1k** (35.6 mg, 0.2 mmol, 1 equiv.). **2k** was obtained as a colorless solid (17.5 mg, 50%) after flash chromatography on silica gel (60% to 80% ethyl acetate in hexanes). Spectral features match with previous literature.<sup>11</sup>

**<sup>1</sup>H NMR** (500 MHz, CD<sub>3</sub>CN): δ (ppm) = 4.98 (d, *J* = 4.4 Hz, 1H), 4.41 – 4.32 (m, 1H), 3.90 – 3.81 (m, 1H), 3.68 – 3.58 (m, 2H), 3.52 (d, *J* = 8.4 Hz, 1H), 3.34 (s, 3H), 1.36 (d, *J* = 6.2 Hz, 3H).

**<sup>13</sup>C NMR** (126 MHz, CD<sub>3</sub>CN): δ (ppm) = 206.7, 103.2, 78.5, 75.9, 72.0, 55.7, 18.9.

**(2R,3R,5S,6S)-2-(cyclohexyloxy)-3,5-dihydroxy-6-methyltetrahydro-4H-pyran-4-one (2I)**

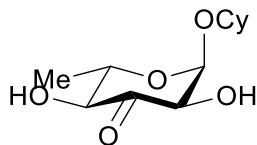

Prepared according to **General Procedure D** from **1I** (49.2 mg, 0.2 mmol, 1 equiv.). **2I** was obtained as a colorless solid (24.4 mg, 50%) after flash chromatography on silica gel (20% to 60% ethyl acetate in hexanes).

**<sup>1</sup>H NMR** (400 MHz, CD<sub>3</sub>CN): δ (ppm) = 5.22 (d, *J* = 4.6 Hz, 1H, H1), 4.33 (ddd, *J* = 9.3, 4.5, 1.5 Hz, 1H, H2), 3.84 (ddd, *J* = 9.3, 4.9, 1.4 Hz, 1H, H4), 3.80 – 3.67 (m, 1H, H5), 3.65 – 3.51 (m, 2H, CH, OH), 3.39 (d, *J* = 9.4 Hz, 1H, OH), 1.88 – 1.76 (m, 2H, CH<sub>2</sub>), 1.76 – 1.60 (m, 2H, CH<sub>2</sub>), 1.55 – 1.43 (m, 1H, CH<sub>2</sub>), 1.35 – 1.16 (m, 8H, CH<sub>3</sub>, CH<sub>2</sub>).

**<sup>13</sup>C NMR** (100 MHz, CD<sub>3</sub>CN): δ (ppm) = 207.0 (C3), 100.6 (C1), 78.6 (C4), 77.3 (CH), 75.8 (C2), 72.3 (C5), 34.0 (CH<sub>2</sub>), 32.1 (CH<sub>2</sub>), 26.3 (CH<sub>2</sub>), 24.7 (CH<sub>2</sub>), 24.5 (CH<sub>2</sub>), 18.9 (CH<sub>3</sub>).

**IR (thin film, cm<sup>-1</sup>):** 3415 (m, br), 2930 (m), 2857 (m), 1729 (s), 1449 (w), 1424 (w), 1380 (w), 1358 (w), 1343 (w), 1160 (w), 1122 (m), 1102 (m), 1063 (s), 1033 (s), 1004 (s), 967 (m), 933 (m), 878 (m), 853 (m), 678 (w).

**HRMS** (DART<sup>+</sup>, *m/z*): calculated for C<sub>12</sub>H<sub>21</sub>O<sub>5</sub> [M+H]<sup>+</sup>: 245.1383, found 245.1380.

**(2S,3S,5R,6R)-3,5-dihydroxy-2-methyl-6-(((3aR,5R,5aS,8aS,8bR)-2,2,7,7-tetramethyltetrahydro-5H-bis([1,3]dioxolo)[4,5-b:4',5'-d]pyran-5-yl)methoxy)tetrahydro-4H-pyran-4-one (2m)**

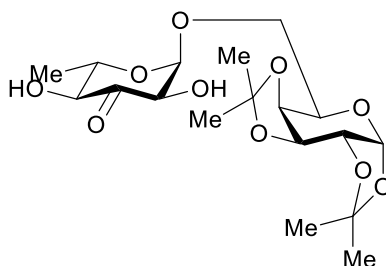

Prepared according to **General Procedure D** (0.1 mmol scale) from **1m** (40.6 mg, 0.1 mmol, 1 equiv.). **2m** was obtained as a colorless solid (20.5 mg, 51%) after flash chromatography on silica gel (50% to 80% ethyl acetate in hexanes).

**<sup>1</sup>H NMR** (500 MHz, CD<sub>3</sub>CN): δ (ppm) = 5.44 (d, J = 5.0 Hz, 1H, Gal-H1), 5.16 (d, J = 4.4, 1H, Rham-H1), 4.59 (dd, J = 7.9, 2.4 Hz, 1H, Gal-H3), 4.36 (s, 1H, Rham-H2), 4.32 (dd, J = 5.0, 2.4 Hz, 1H, Gal-H2), 4.17 (dd, J = 7.9, 1.9 Hz, 1H, Gal-H4), 3.94 – 3.89 (m, 1H, Gal-H5), 3.88 – 3.82 (m, 1H, Rham-H4), 3.80 – 3.73 (m, 2H, Gal-H6<sub>a</sub>, Rham-H5), 3.53 (dd, J = 10.3, 6.6 Hz, 1H, Gal-H6<sub>b</sub>), 1.48 (s, 3H, CH<sub>3</sub>), 1.37 (s, 3H, CH<sub>3</sub>), 1.35 (d, J = 6.1 Hz, 3H, CH<sub>3</sub>), 1.30 (s, 3H, CH<sub>3</sub>), 1.29 (s, 3H, CH<sub>3</sub>).

**<sup>13</sup>C NMR** (126 MHz, CD<sub>3</sub>CN): δ (ppm) = 206.7 (Rham-C3), 109.8 (Gal-C(CH<sub>3</sub>)<sub>2</sub>), 109.4 (Gal-C(CH<sub>3</sub>)<sub>2</sub>), 102.2 (Rham-C1), 97.1 (Gal-C1), 78.5 (Rham-C4), 75.8 (Rham-C2), 72.4 (Rham-C5), 71.7 (Gal-C4), 71.5 (Gal-C3), 71.4 (Gal-C2), 67.5 (Gal-C5), 67.2 (Gal-C6), 26.3 (CH<sub>3</sub>), 26.3 (CH<sub>3</sub>), 25.2 (CH<sub>3</sub>), 24.6 (CH<sub>3</sub>), 18.9 (CH<sub>3</sub>).

**IR** (thin film, cm<sup>-1</sup>): 3450 (w, br), 2965 (w), 2931 (w), 1734 (m), 1378 (m), 1254 (m), 1166 (m), 1114 (m), 1058 (s), 999 (s), 918 (m), 889 (m), 860 (m), 805 (m), 763 (w).

**HRMS** (DART<sup>+</sup>, m/z): calculated for C<sub>18</sub>H<sub>28</sub>NO<sub>10</sub> [M+NH<sub>4</sub>]<sup>+</sup>: 422.2020, found 422.2016.

#### (6-O-tert-butyldimethylsilyl)-methyl-α-D-ribo-hexapyranoside-3-ulose (**2n**) from **1n**

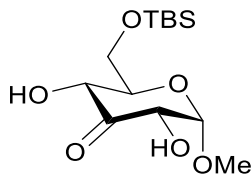

Prepared according to **General Procedure D** from **1n** (61.6 mg, 0.2 mmol, 1 equiv.). **2n** was obtained as a colorless solid (28.2 mg, 46%) after flash chromatography on silica gel (20% to 40% ethyl acetate in hexanes).

**<sup>1</sup>H NMR** (500 MHz, CDCl<sub>3</sub>): δ (ppm) = 5.13 (d, J = 4.4 Hz, 1H), 4.44 – 4.36 (m, 1H), 4.35 – 4.26 (m, 1H), 4.01 – 3.89 (m, 2H), 3.60 (ddd, J = 9.4, 4.0, 2.3 Hz, 1H), 3.45 – 3.35 (m, 4H), 3.18 (d, J = 8.2 Hz, 1H), 0.91 (s, 9H), 0.10 (s, 6H).

**<sup>13</sup>C NMR** (126 MHz, CDCl<sub>3</sub>): δ (ppm) = 206.5, 102.3, 76.1, 74.8, 72.3, 62.6, 55.6, 26.0, 18.6, -5.1, -5.2.

## Substrate Limitations

### $\alpha$ -Galactopyranosides:

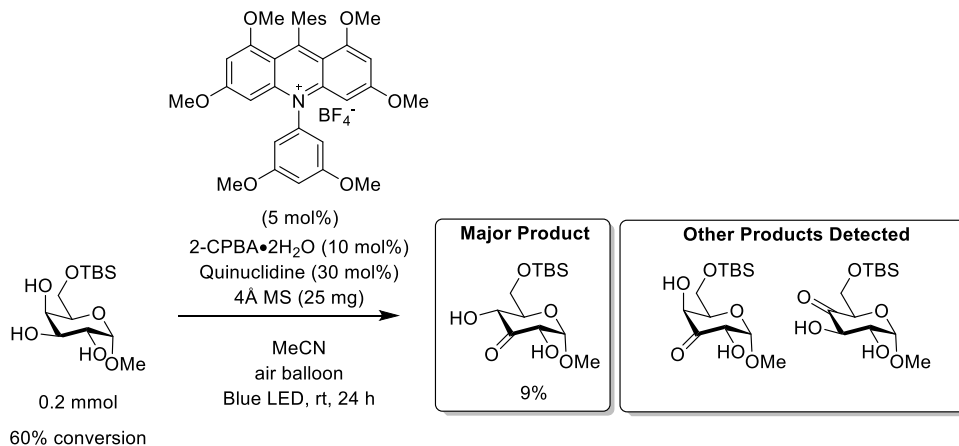

### Crude <sup>1</sup>H NMR (CDCl<sub>3</sub>):

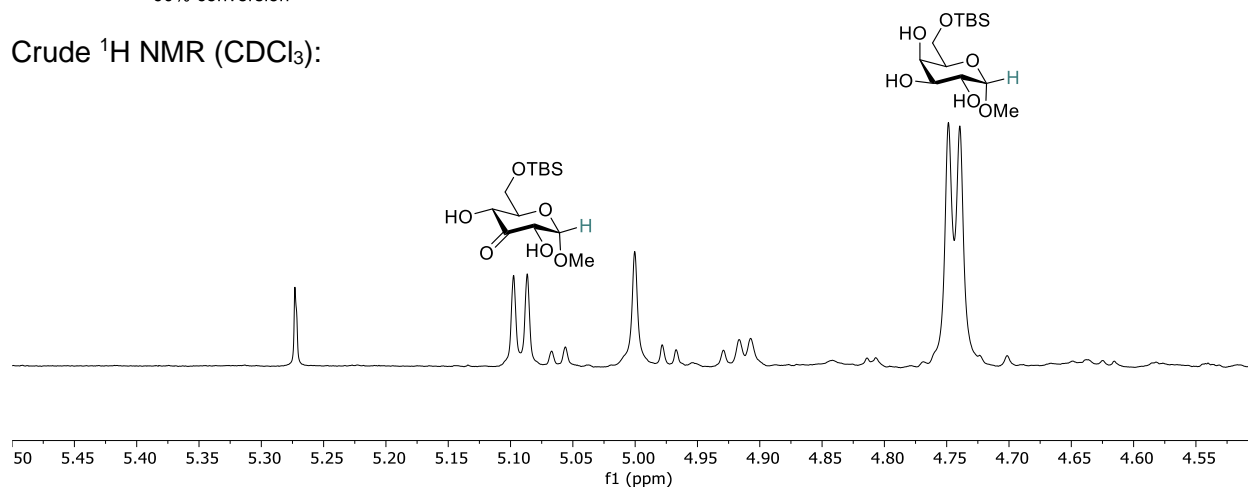

### Base-mediated isomerization:

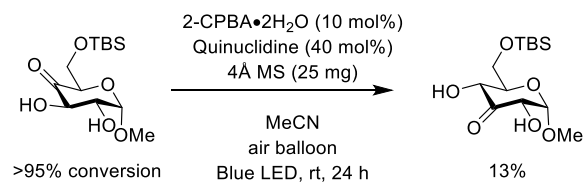



## $\beta$ -Galactopyranosides:

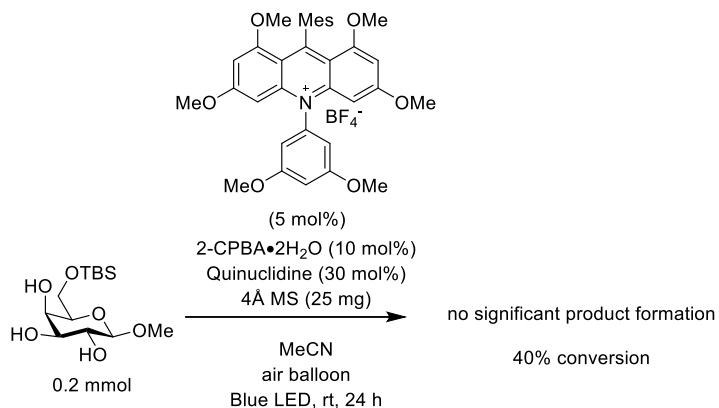

## Crude $^1\text{H}$ NMR ( $\text{CD}_3\text{CN}$ ):

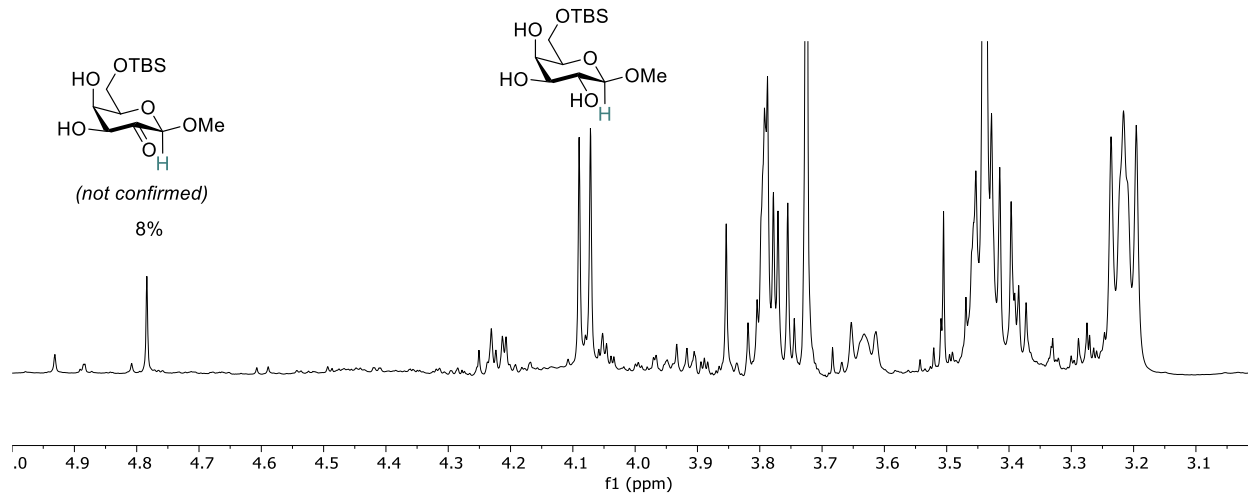

## N-Acetylglucosamine:

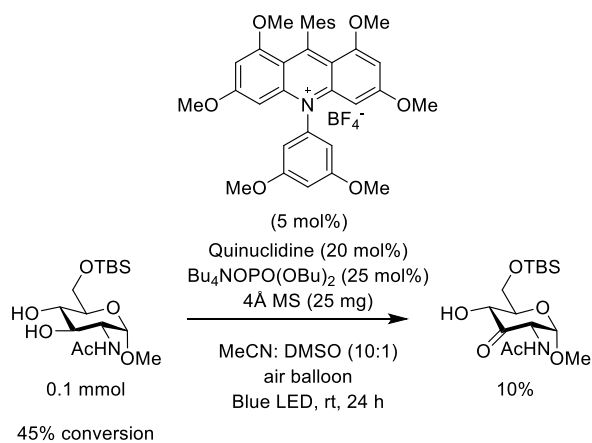

## Glucopyranose:

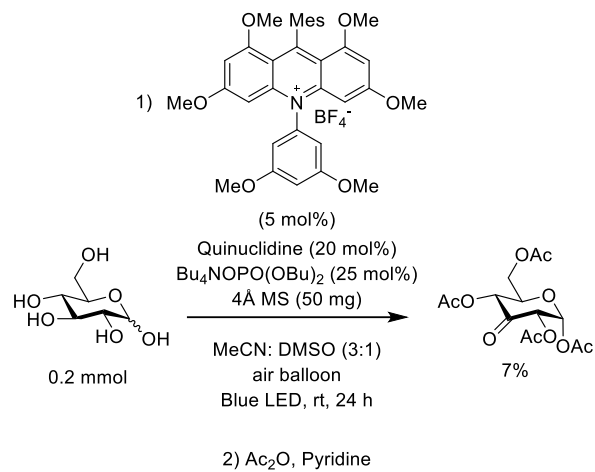

## Sucrose:

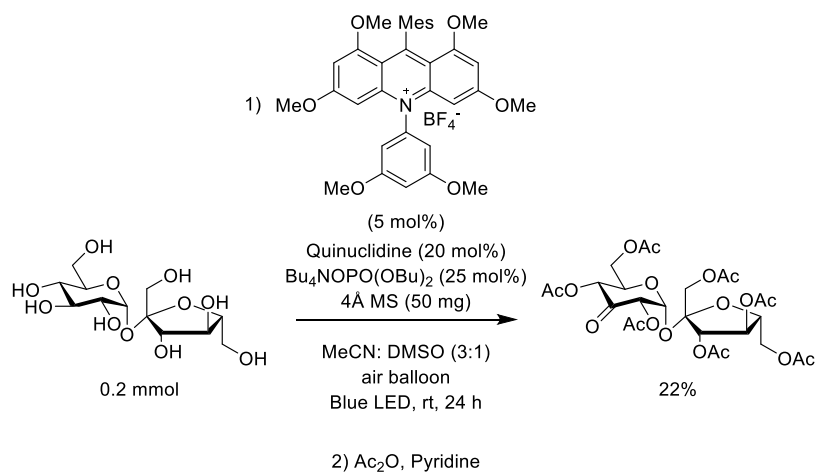

## References

- 1) Lv, J.; Luo, T.; Zou, D.; Dong, H. *European J. Org. Chem.* 2019, **2019**, 6383.
- 2) Reiß, M.; Brietzke, A.; Eickner, T.; Stein, F.; Villinger, A.; Vogel, C.; Kragl, U.; Jopp, S. *RSC Adv.* 2020, **10**, 14299.
- 3) Kasun, Z. A.; Geary, L. M.; Krische, M. J. *Chem. Commun.* 2014, **50**, 7545.
- 4) Gupta, M. R.; Thakur, K.; Khare, N. K. *Carbohydr. Res.* 2018, **457**, 51.
- 5) Konstantinovic, S.; Predojevic, J.; Mojsilovic, B.; Dimitrijevic, B.; Milosevic, G. *Ind. J. Chem. Sect. B* 2001, **40B**, 796.
- 6) Ishida, H.; Ogawa, Y.; Imai, Y.; Kiso, M.; Hasegawa, A.; Sakurai, T.; Azuma, I. *Carbohydr. Res.* 1989, **194**, 199.
- 7) Ying, W.; Gaddam, V.; Harmata, M. *Org. Lett.* 2013, **15**, 2723.
- 8) Gorelik, D. J.; Turner, J. A.; Virk, T. S.; Foucher, D. A.; Taylor, M. S. *Org. Lett.* 2021, **23**, 49.
- 9) Lee, D.; Taylor, M. S. *J. Am. Chem. Soc.* 2011, **133**, 3724.
- 10) Jäger, M.; Hartmann, M.; de Vries, J. G.; Minnaard, A. J. *Angew. Chemie Int. Ed.* 2013, **52**, 7809.
- 11) Chung, K.; Waymouth, R. M. *ACS Catal.* 2016, **6**, 4653.

## NMR Files

2a - <sup>1</sup>H NMR (500 MHz, CD<sub>3</sub>CN)

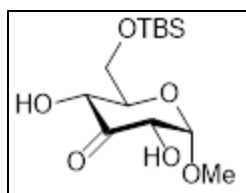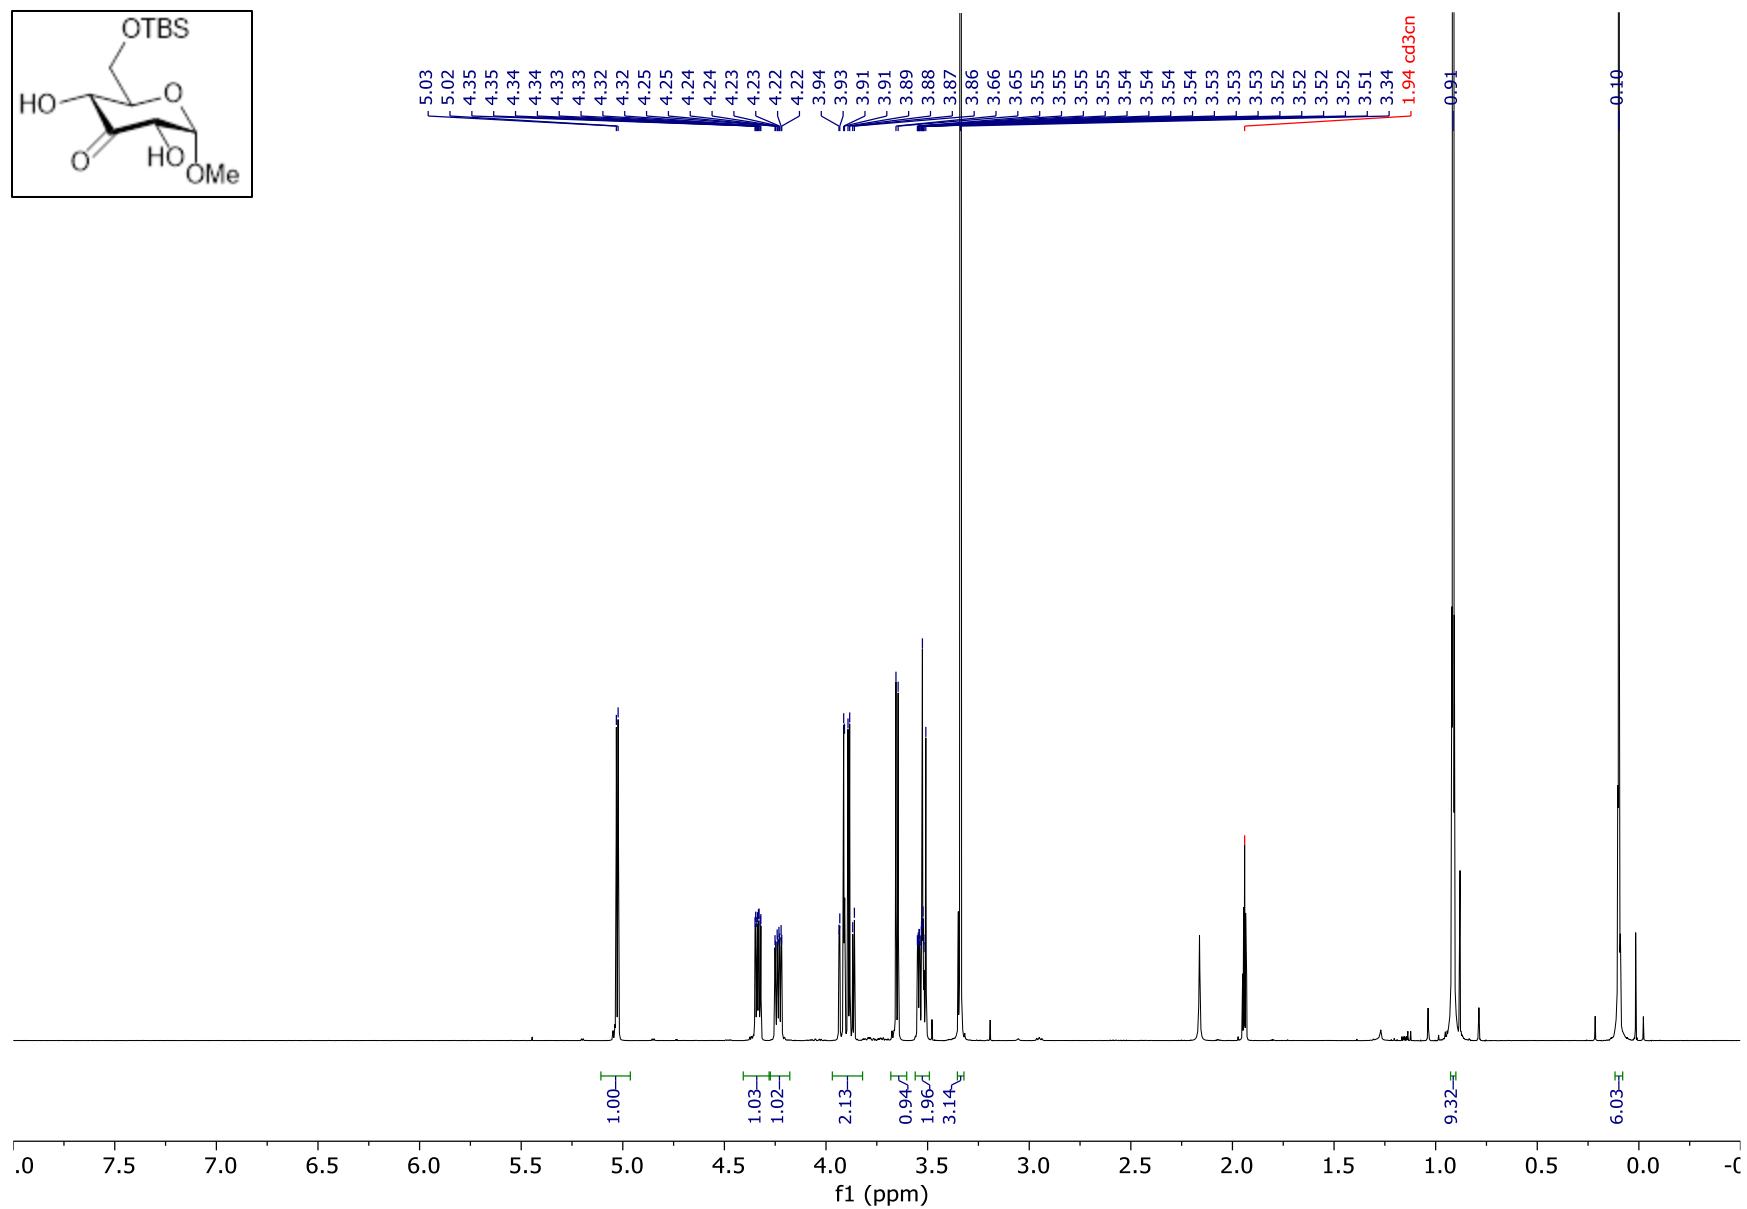

2a –  $^{13}\text{C}$  NMR (126 MHz,  $\text{CD}_3\text{CN}$ )

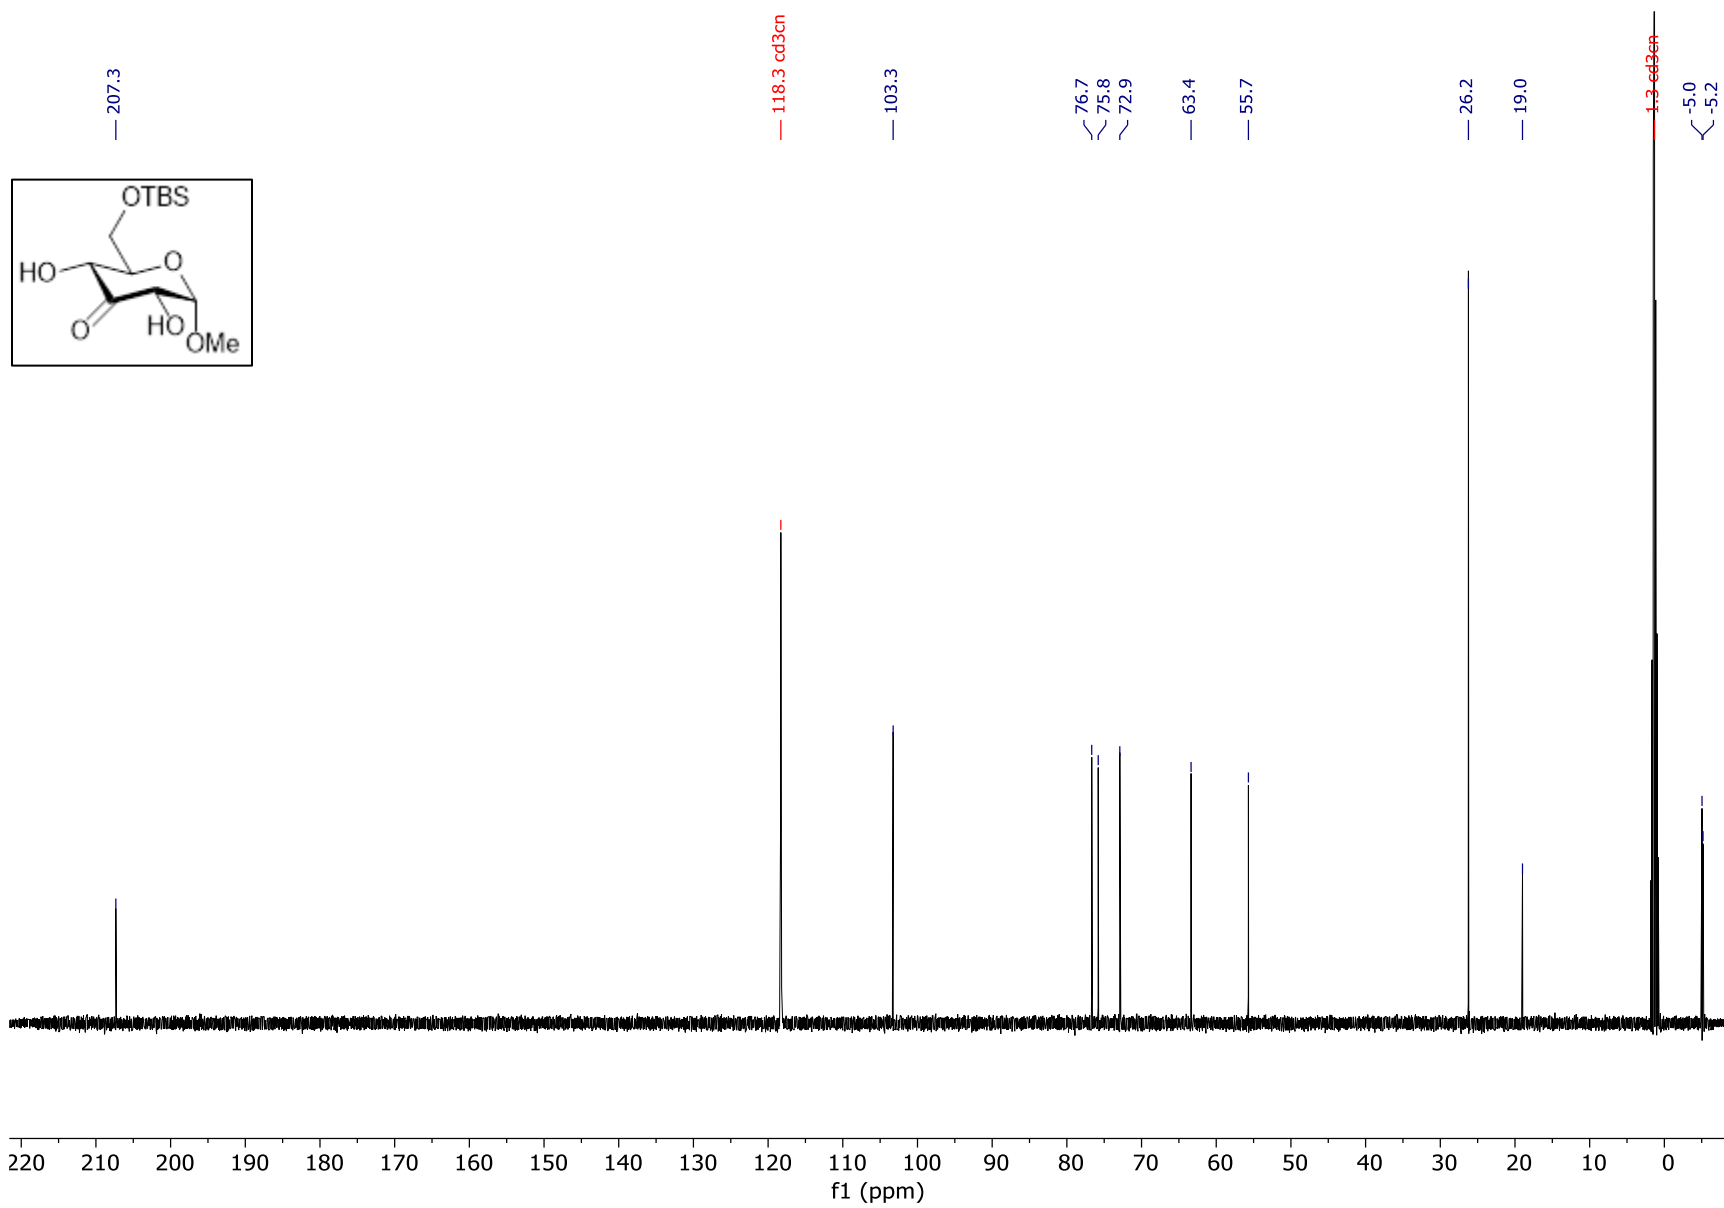

2a – COSY (500 MHz, CD<sub>3</sub>CN)

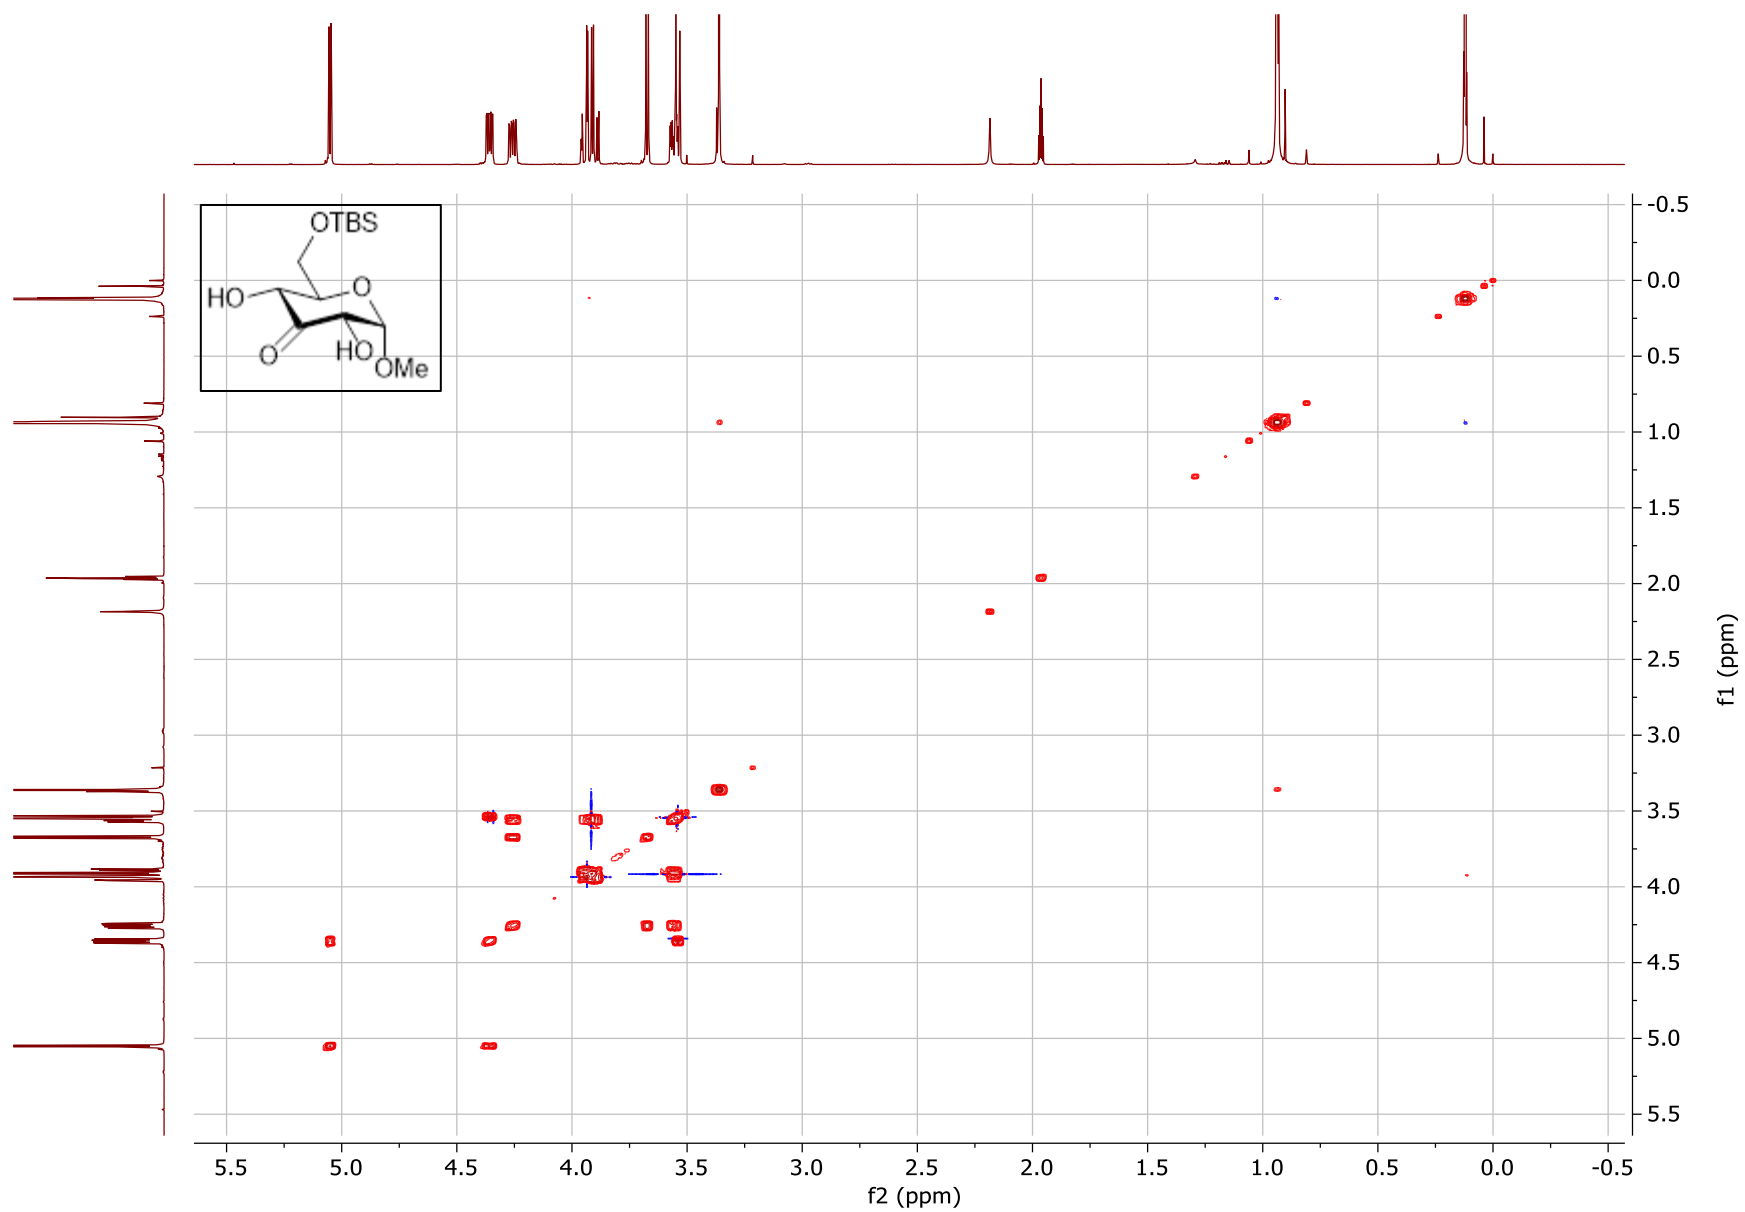

2a – HSQC (500 MHz, CD<sub>3</sub>CN)

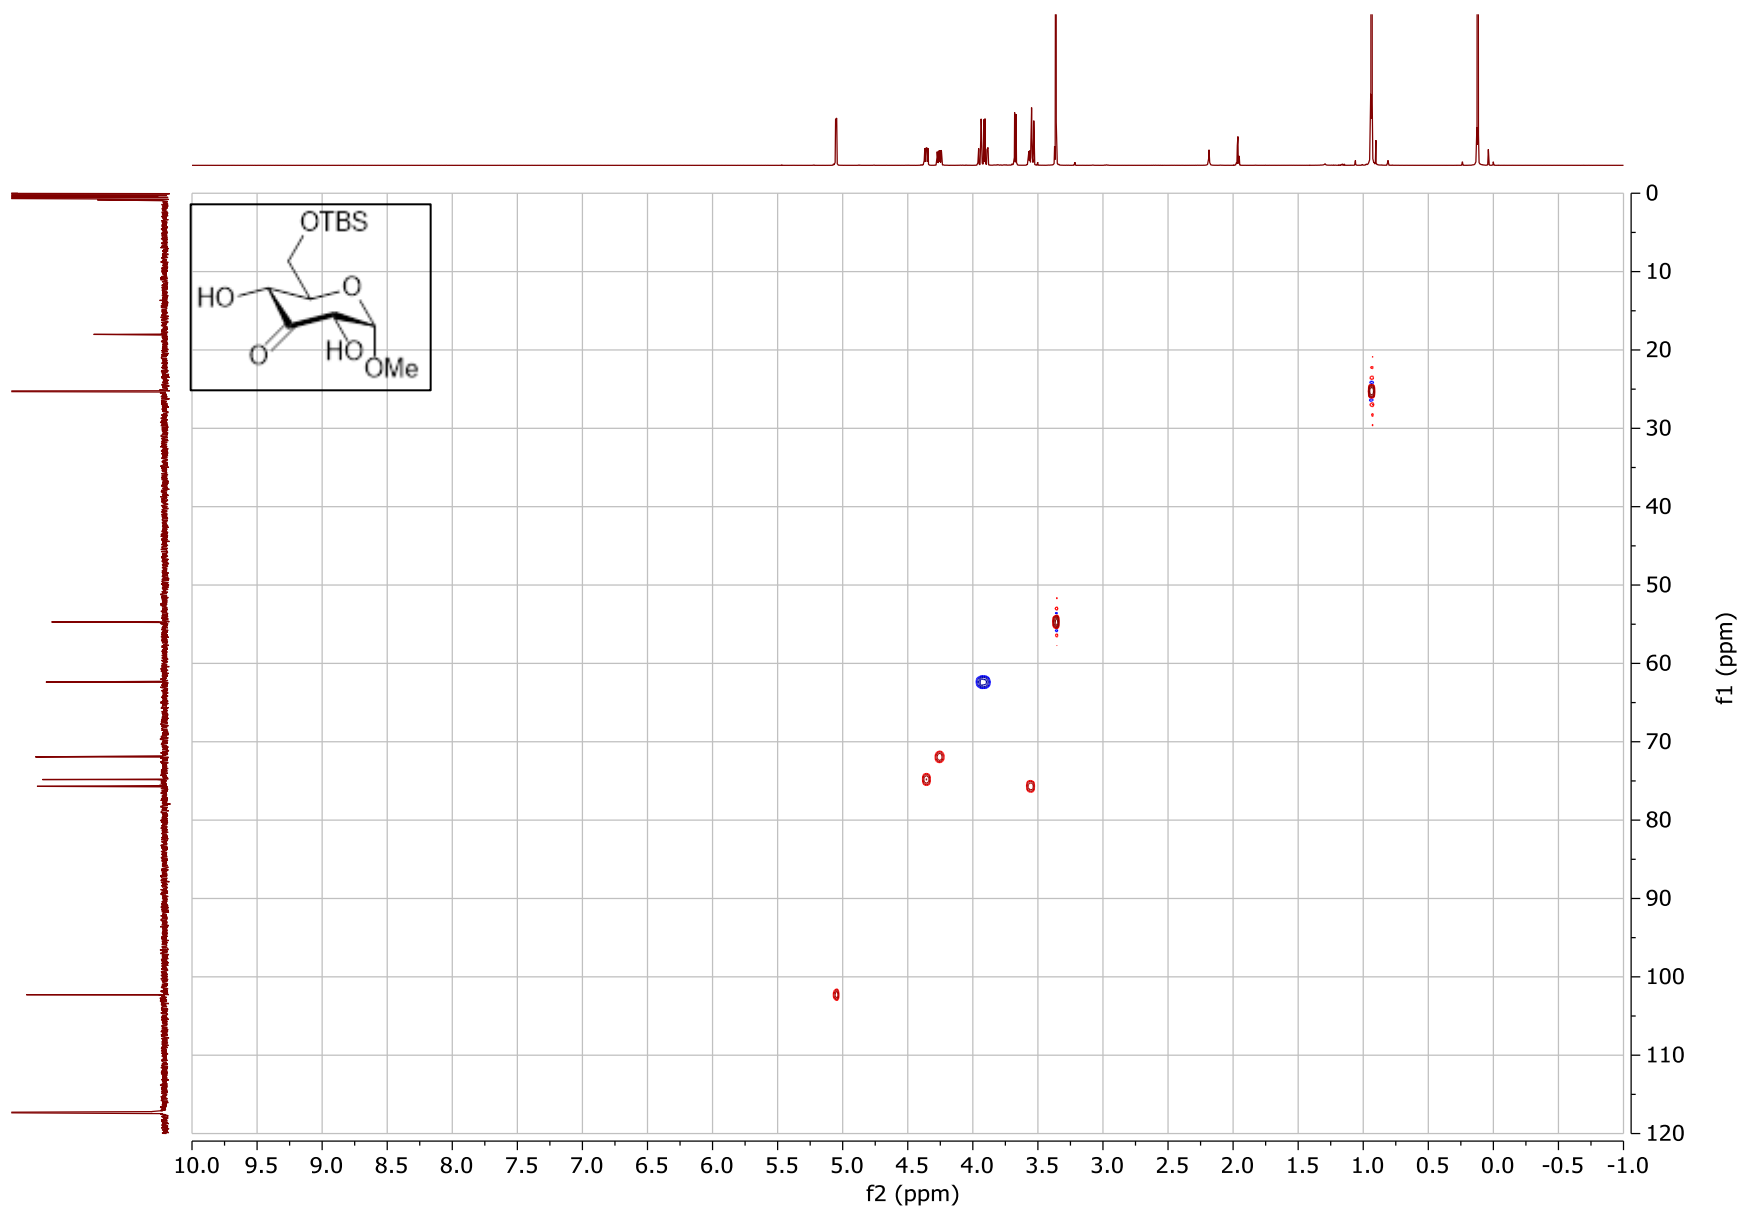



2b – <sup>1</sup>H NMR (500 MHz, CD<sub>3</sub>CN)

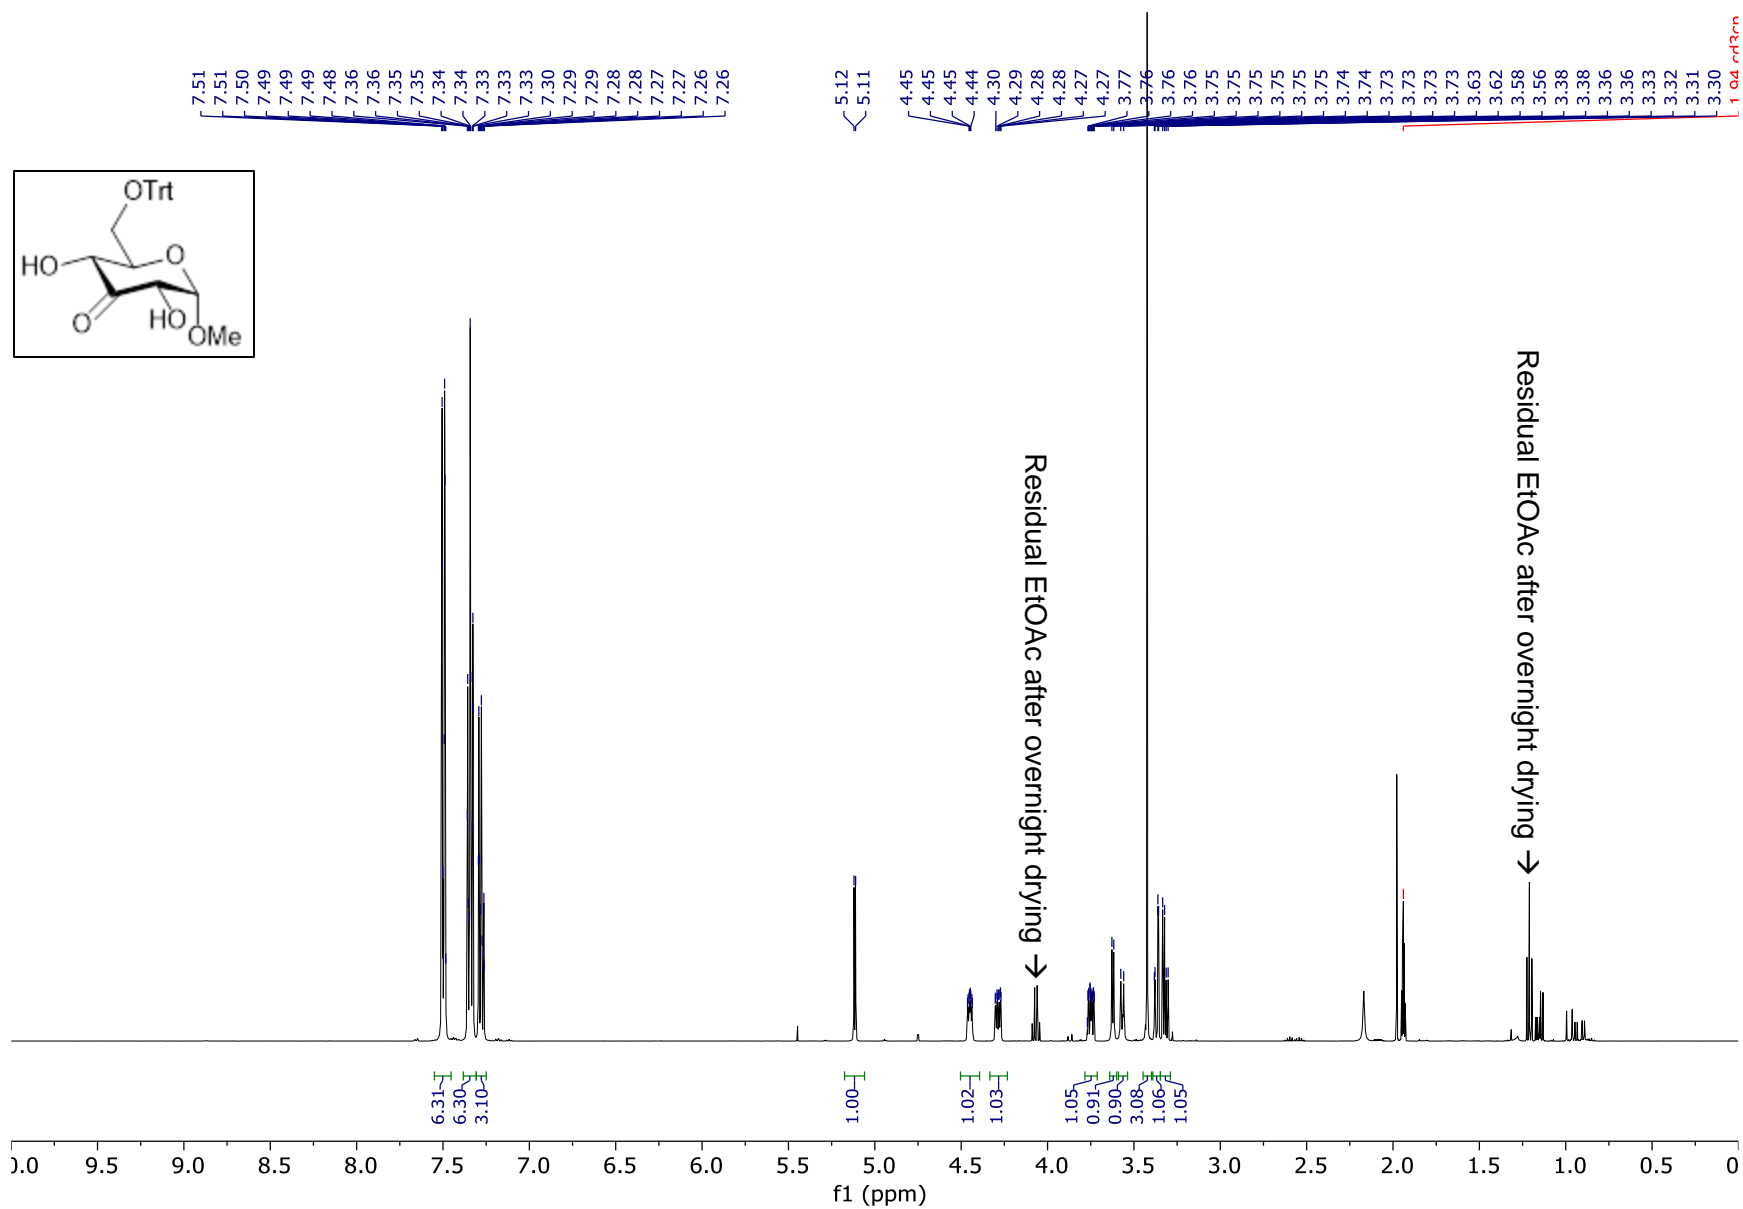

2b – <sup>13</sup>C NMR (126 MHz, CD<sub>3</sub>CN)

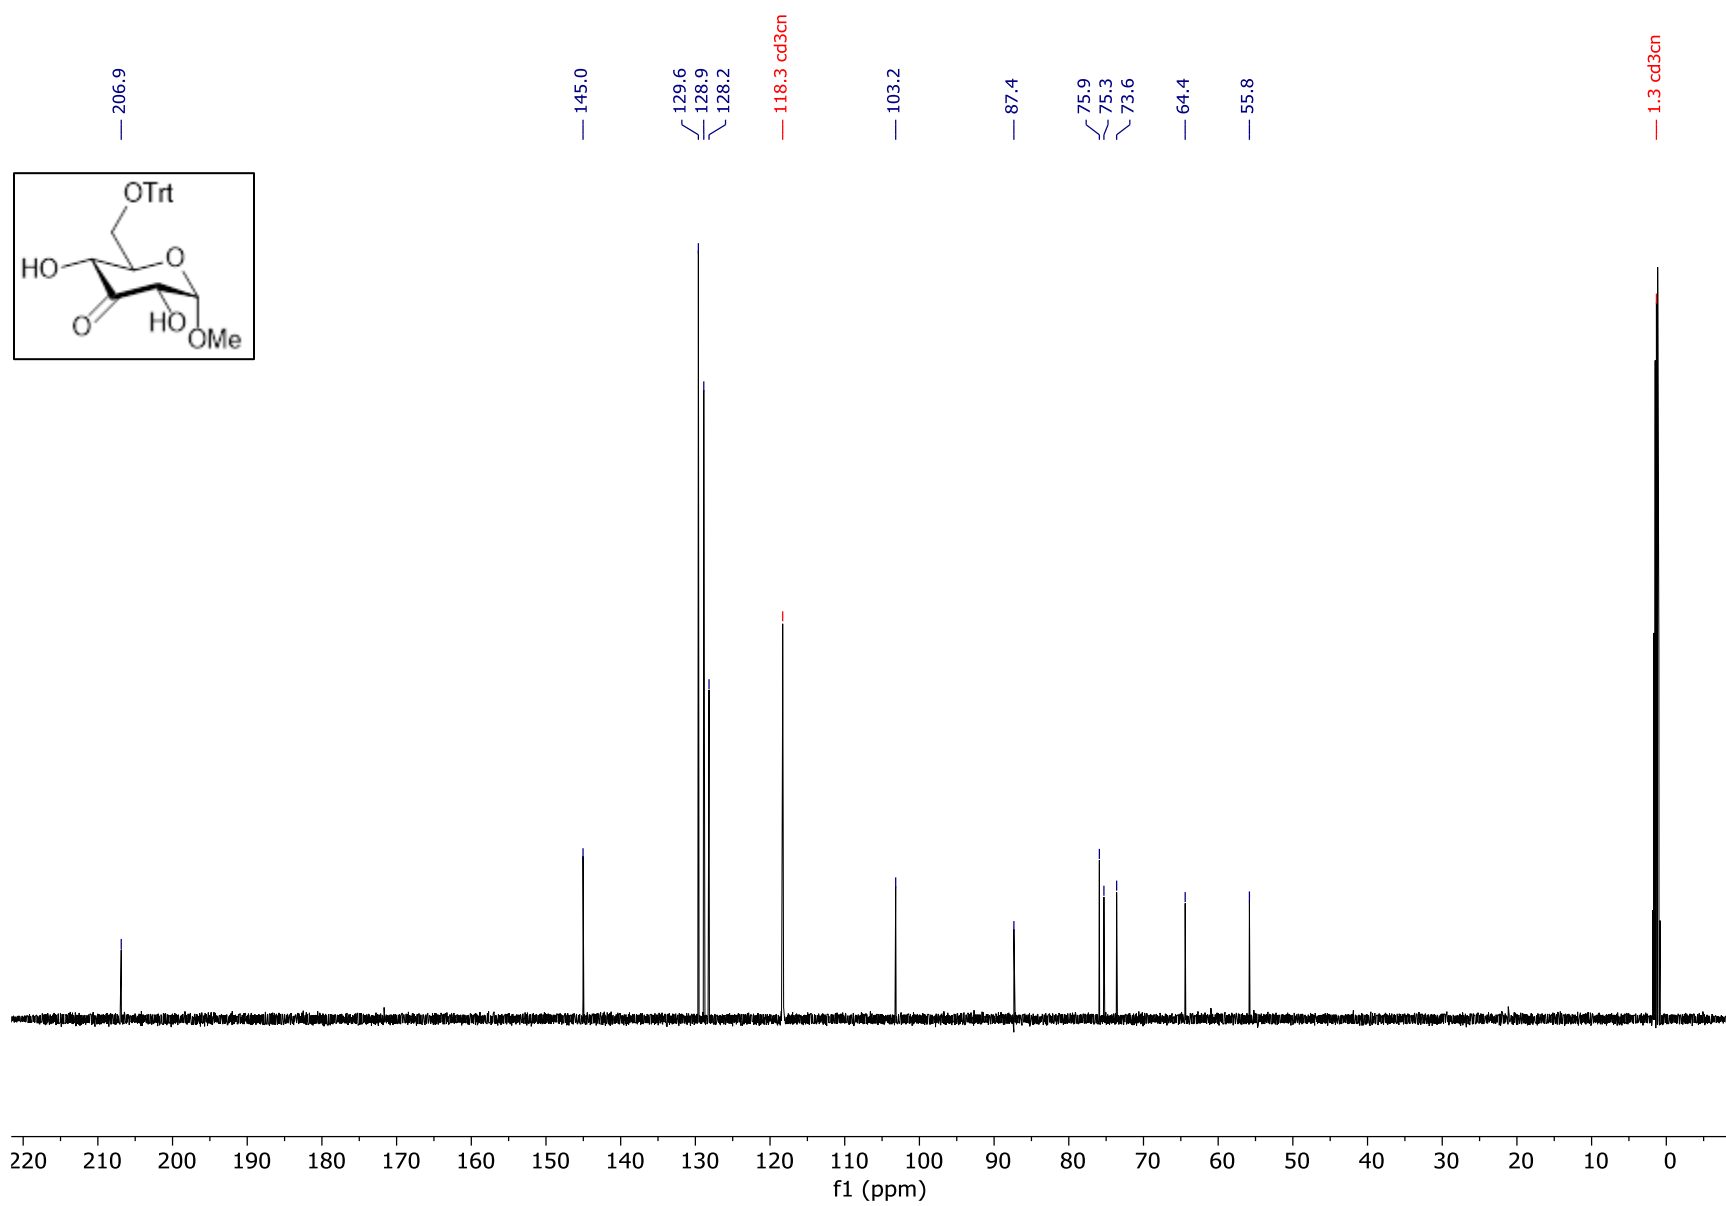

2b – COSY (500 MHz, CD<sub>3</sub>CN)

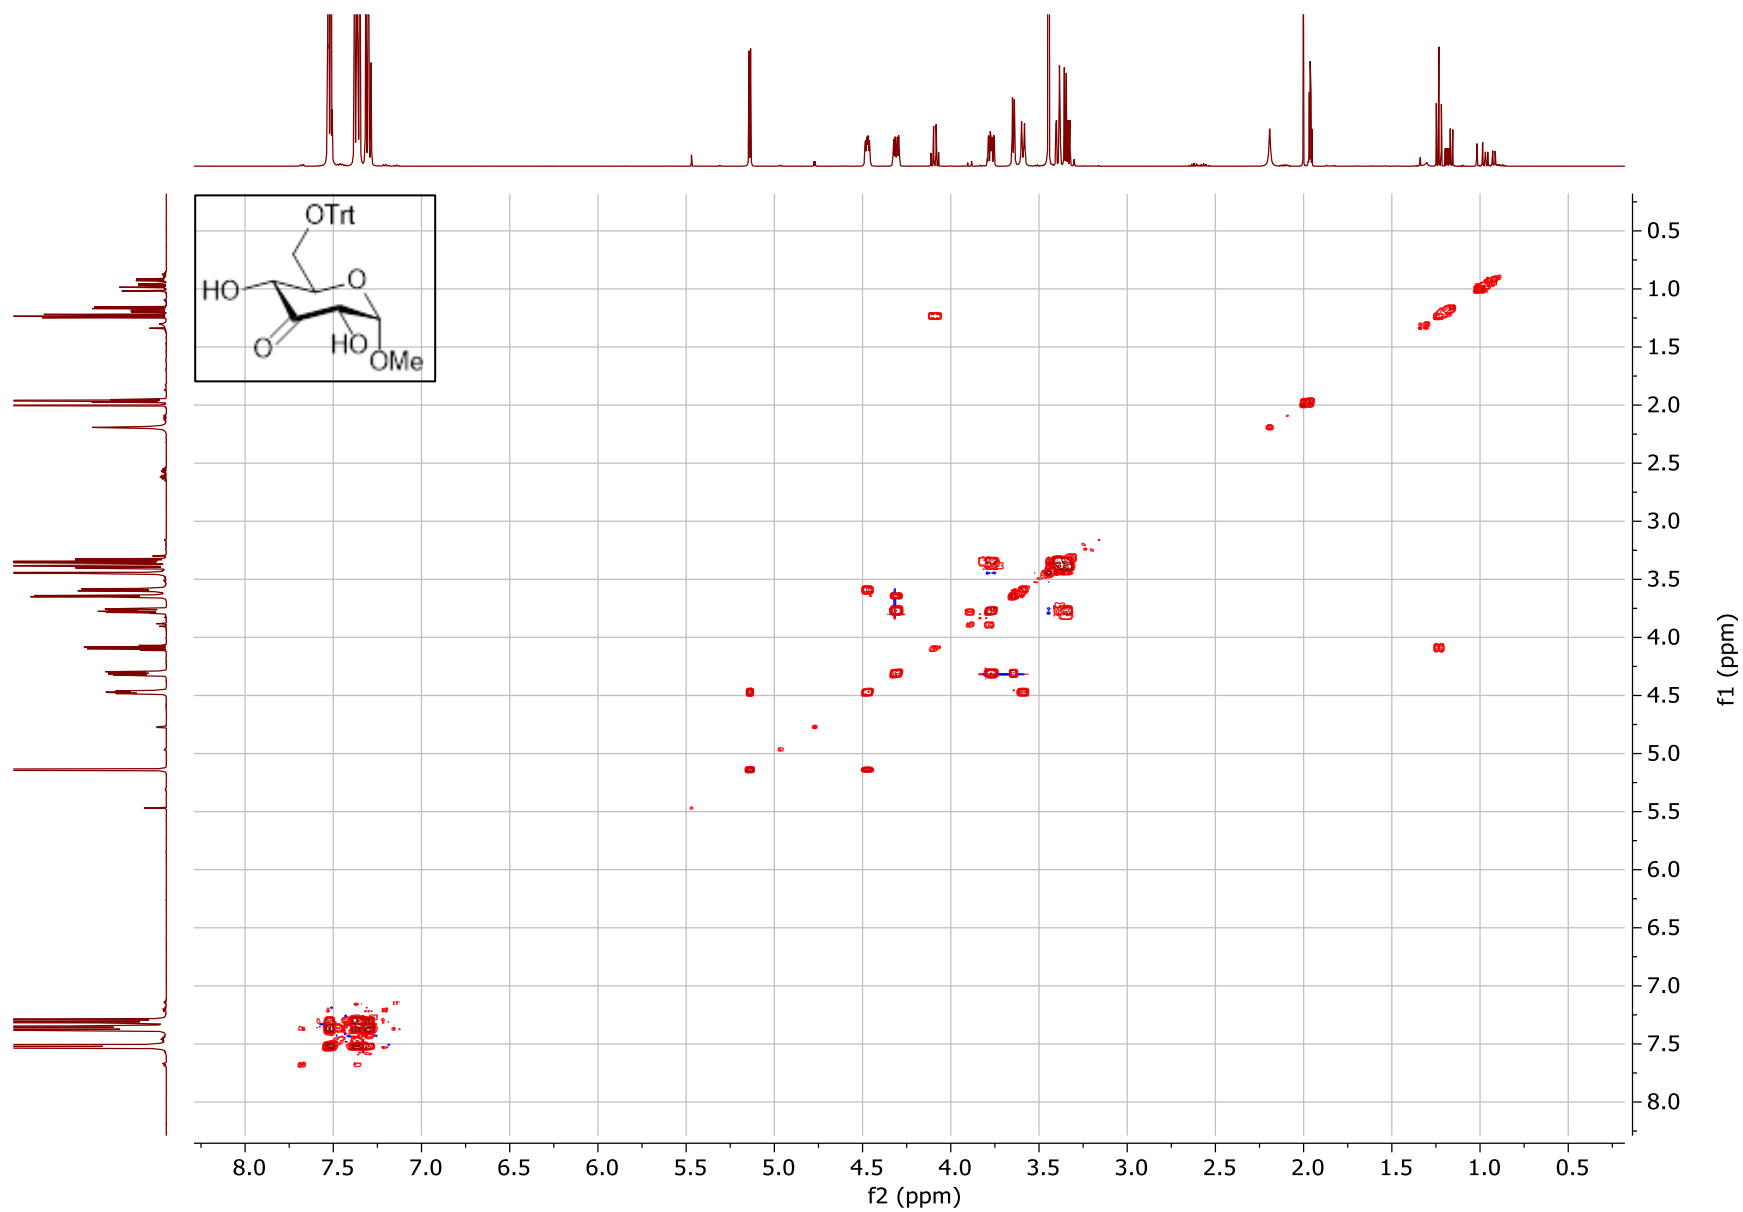

2b – HSQC (500 MHz, CD<sub>3</sub>CN)

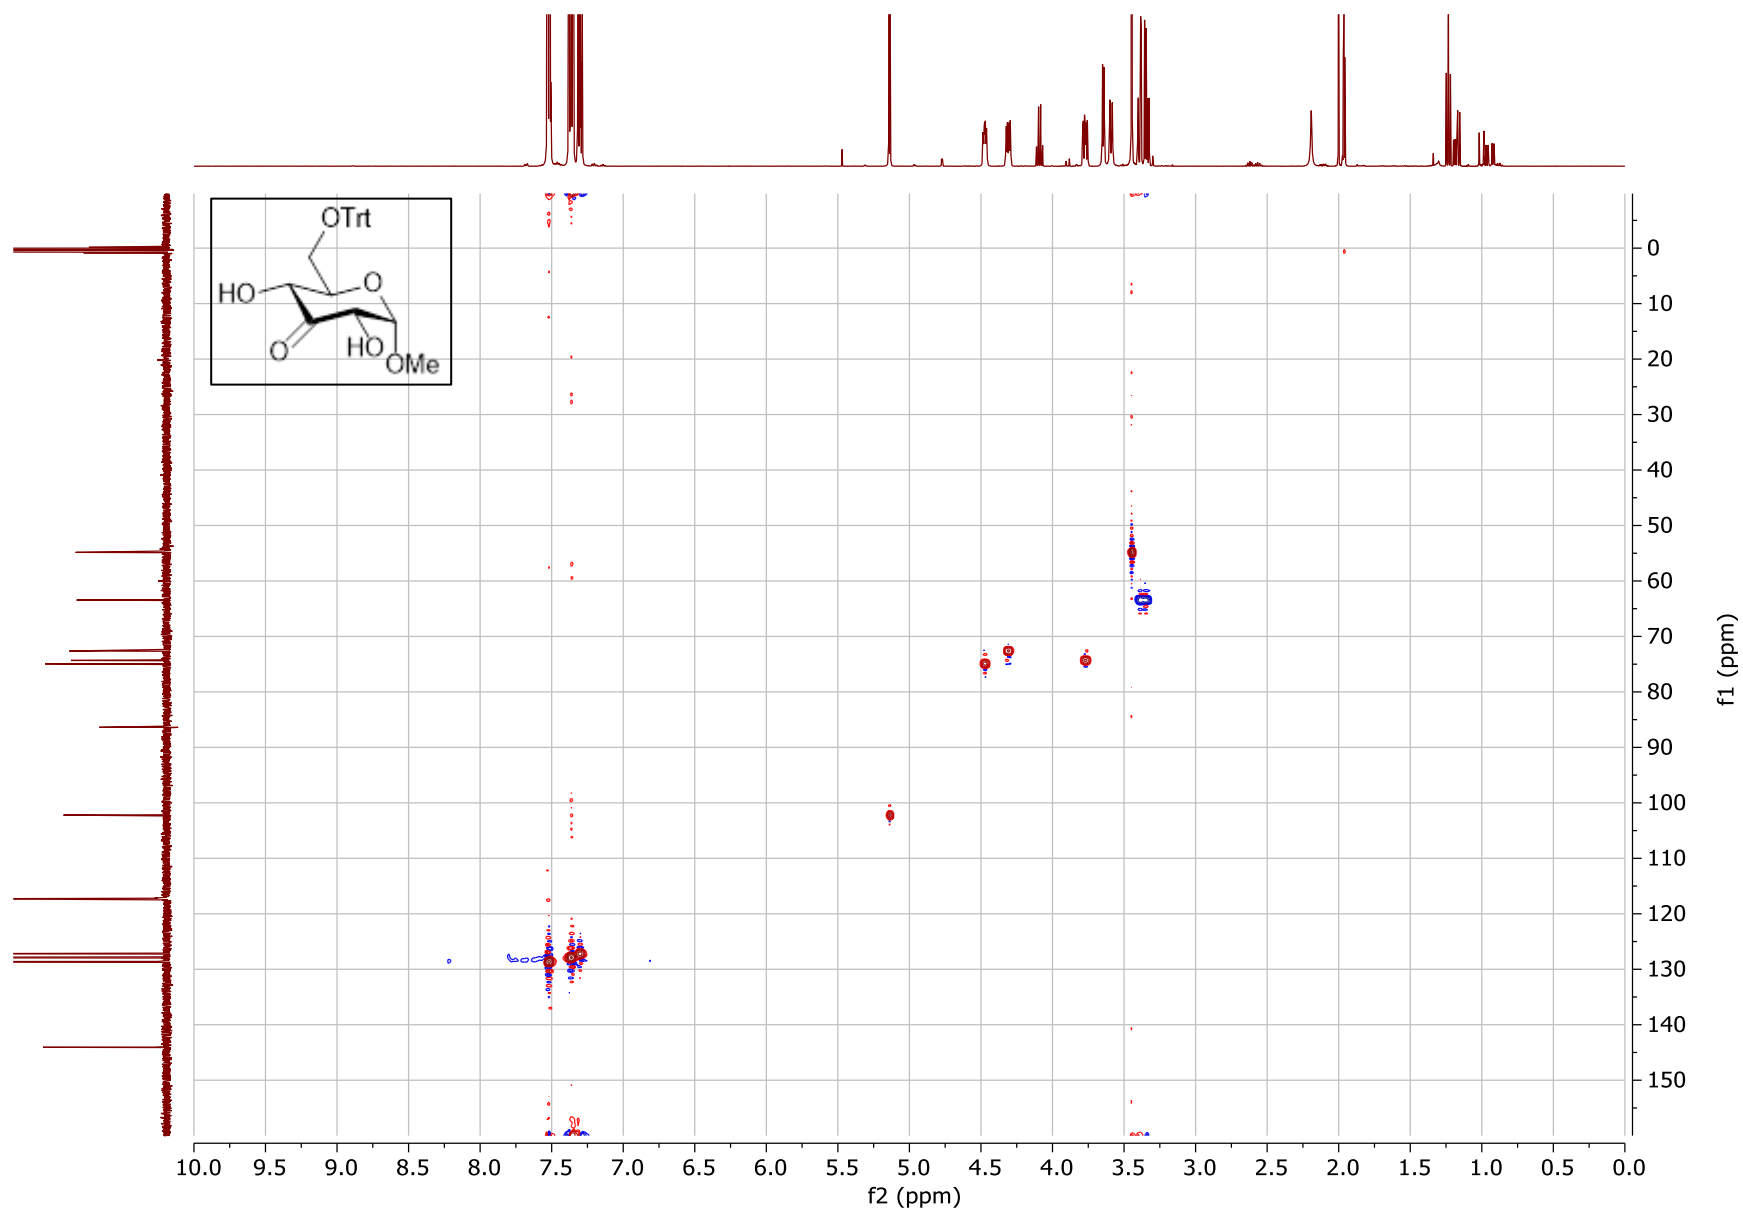

2c - <sup>1</sup>H NMR (500 MHz, CDCl<sub>3</sub>)

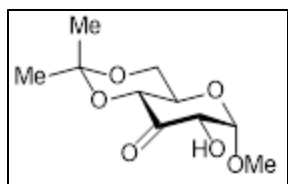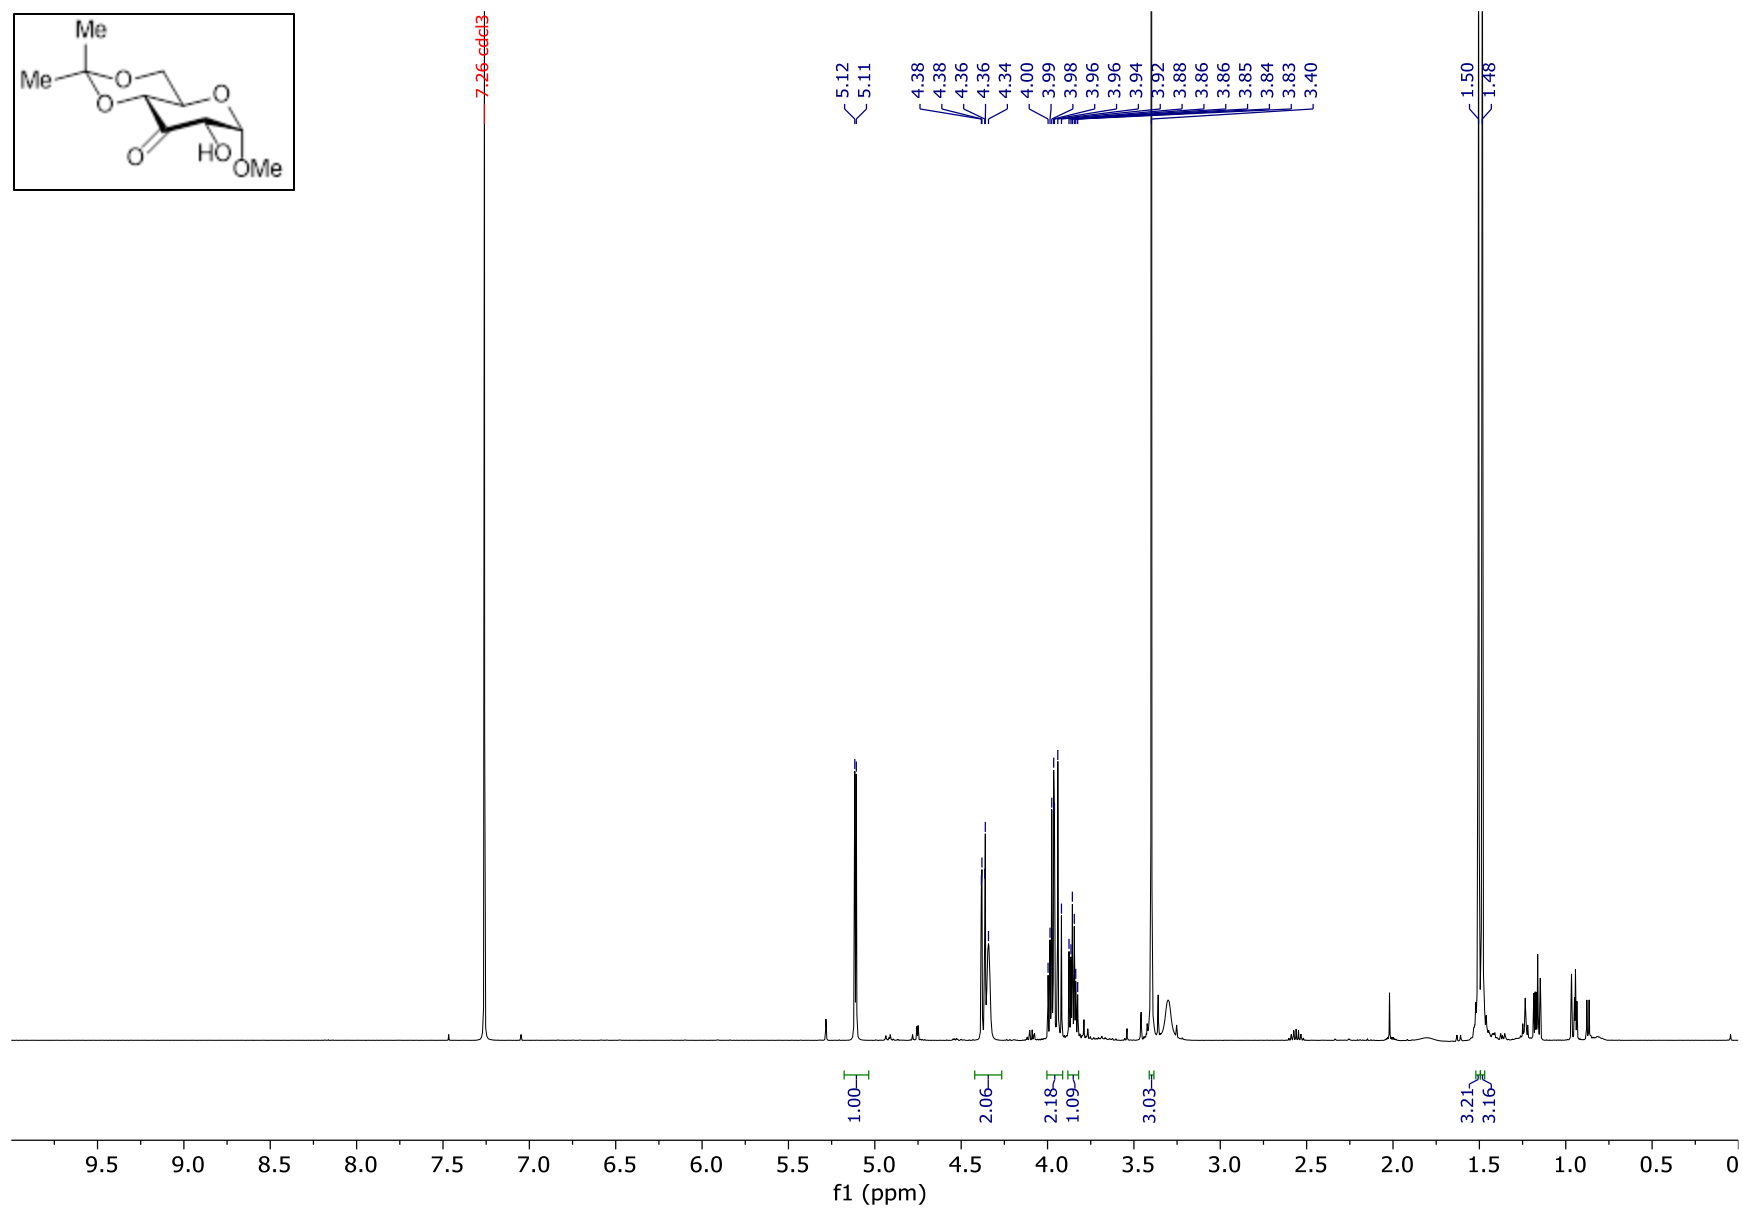

2c - <sup>13</sup>C NMR (126 MHz, CDCl<sub>3</sub>)

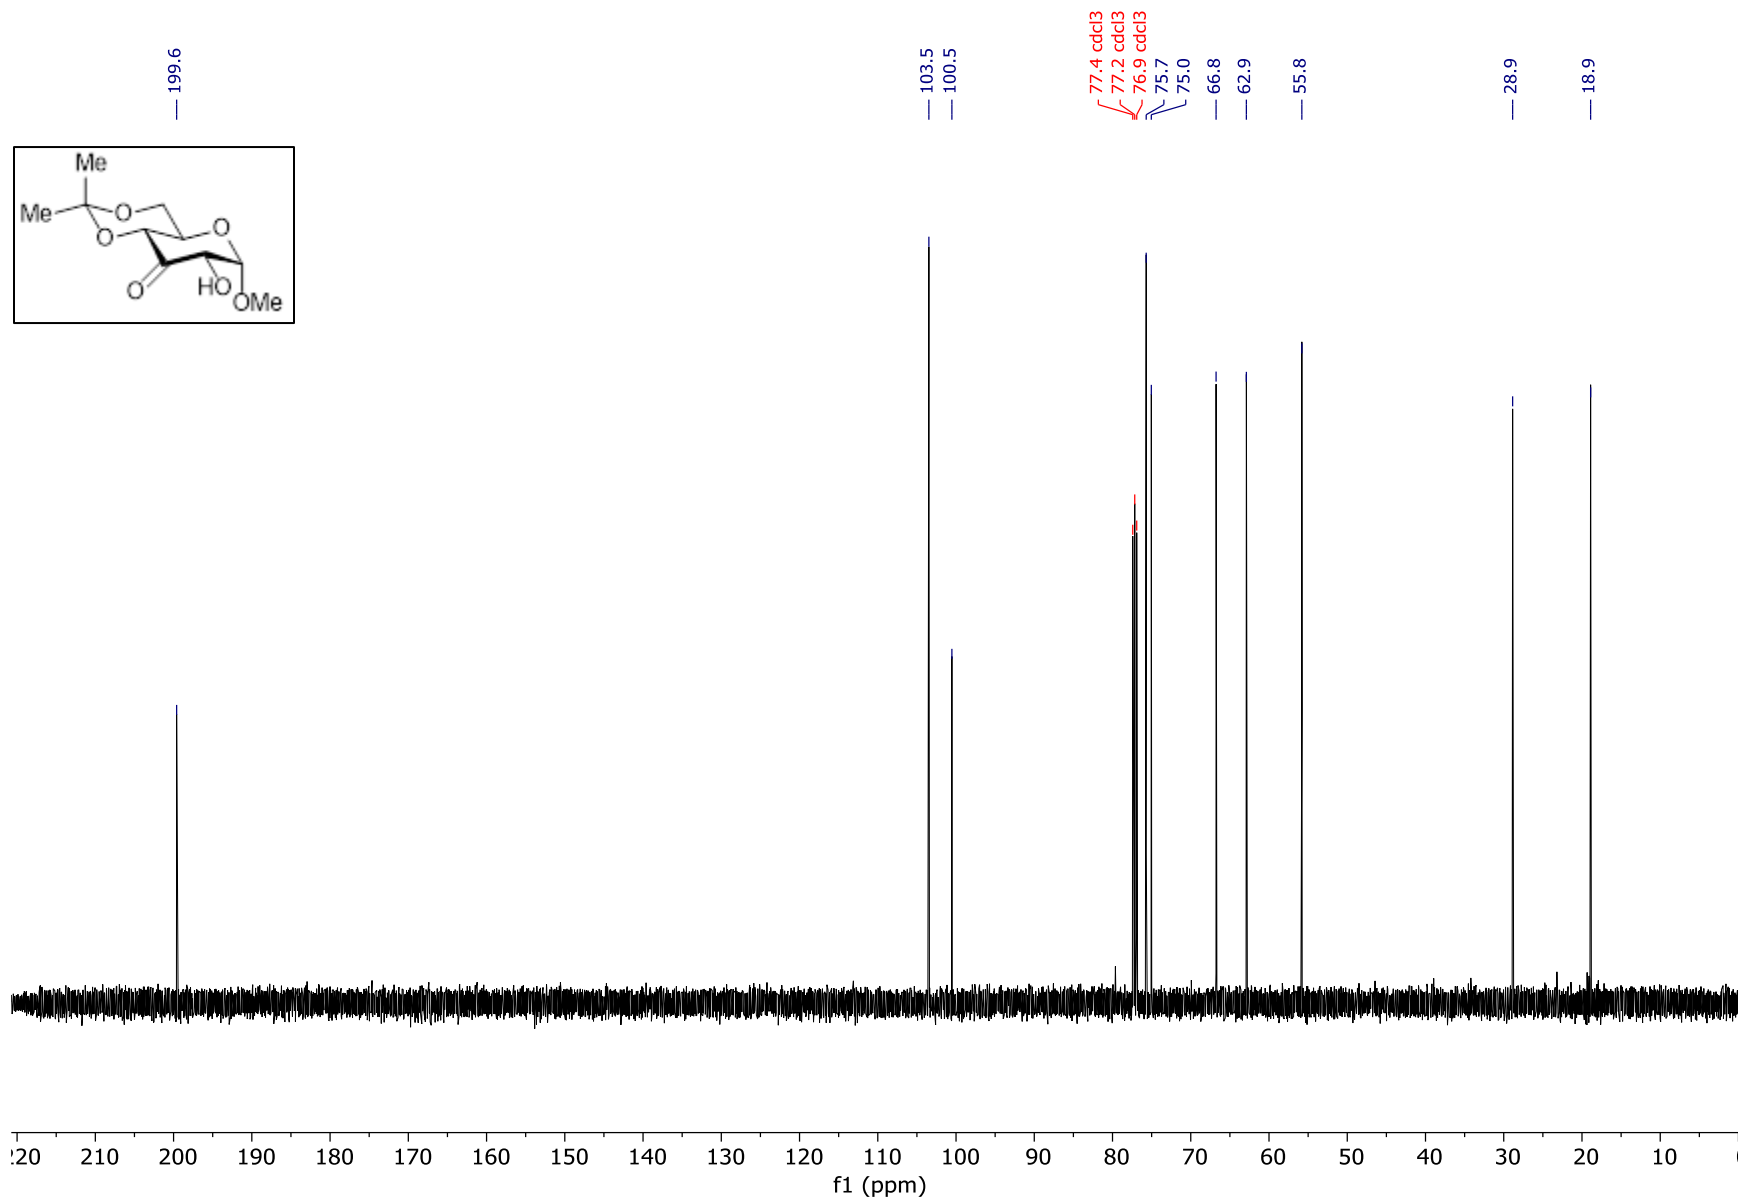

2c – COSY (500 MHz, CDCl<sub>3</sub>)

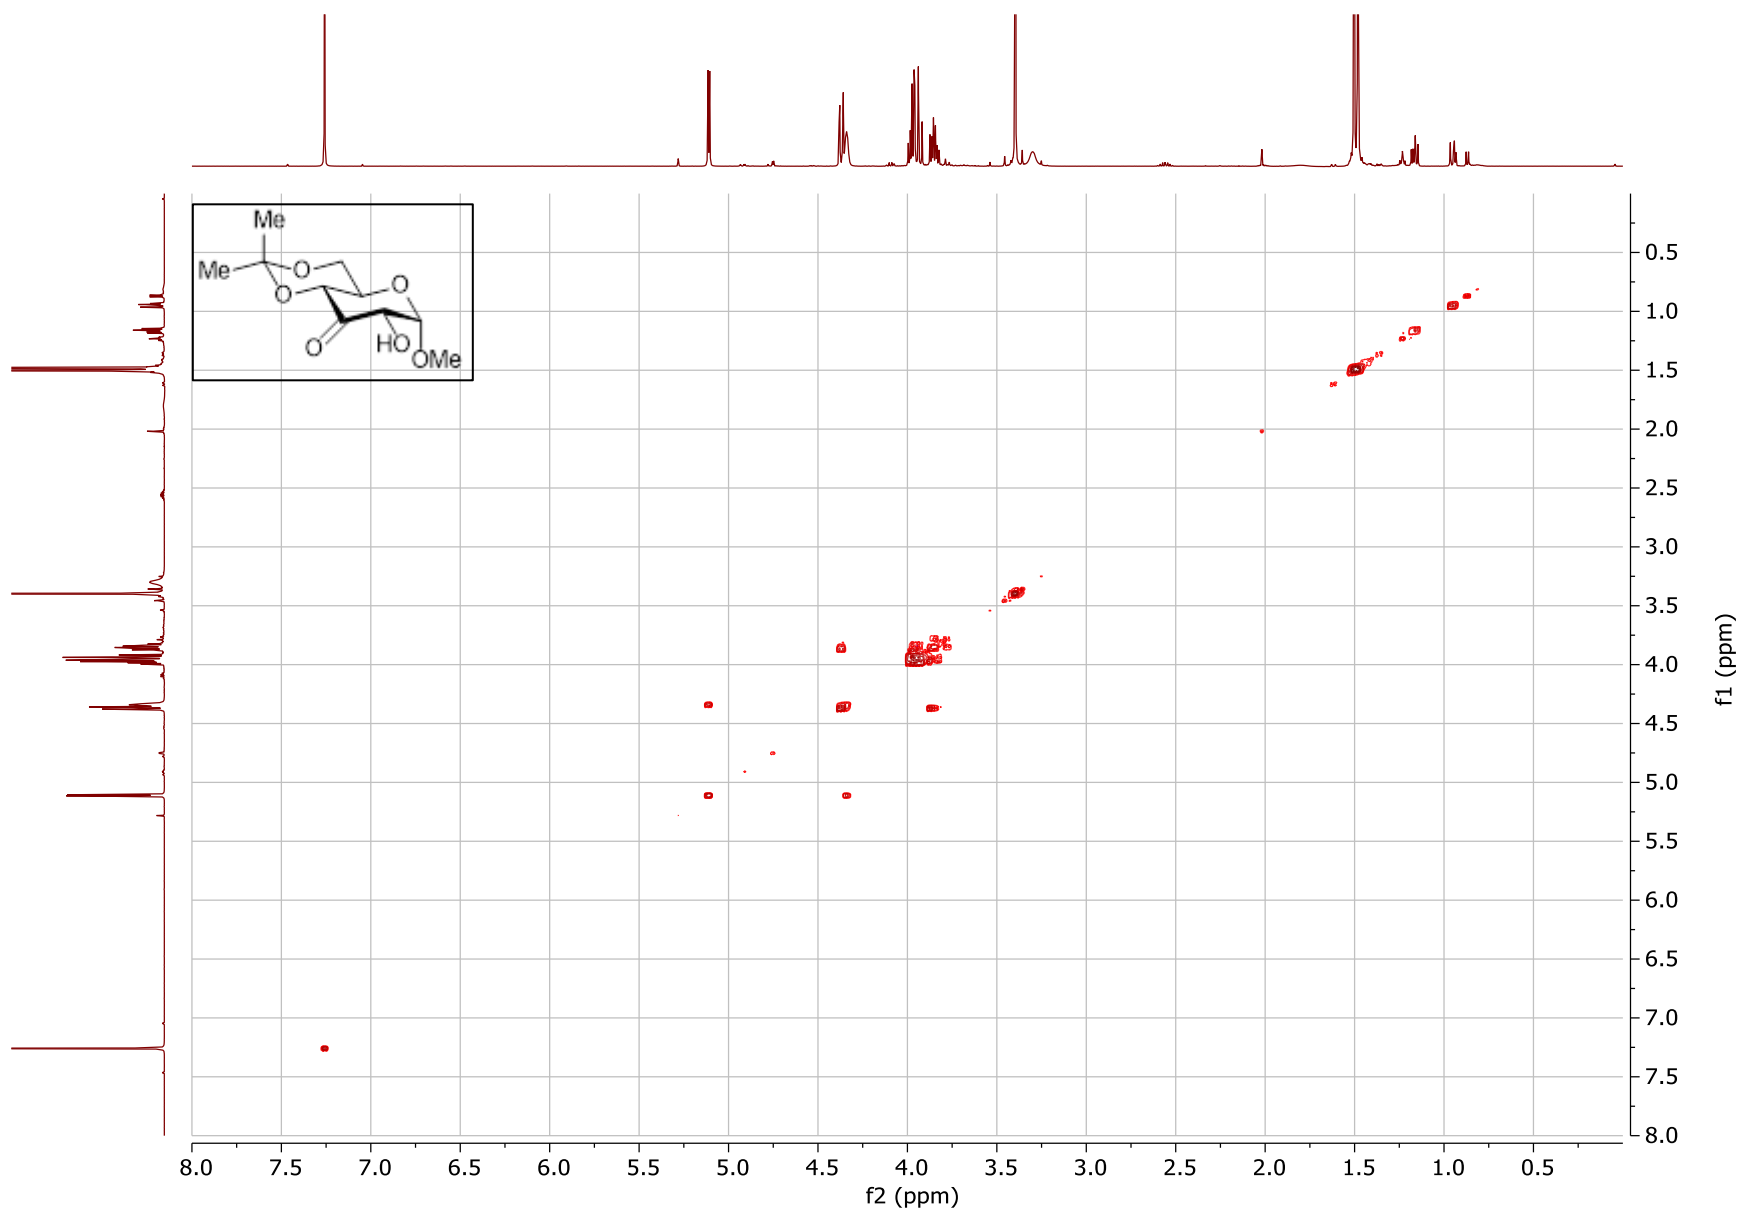

2c - HSQC (500 MHz, CDCl<sub>3</sub>)

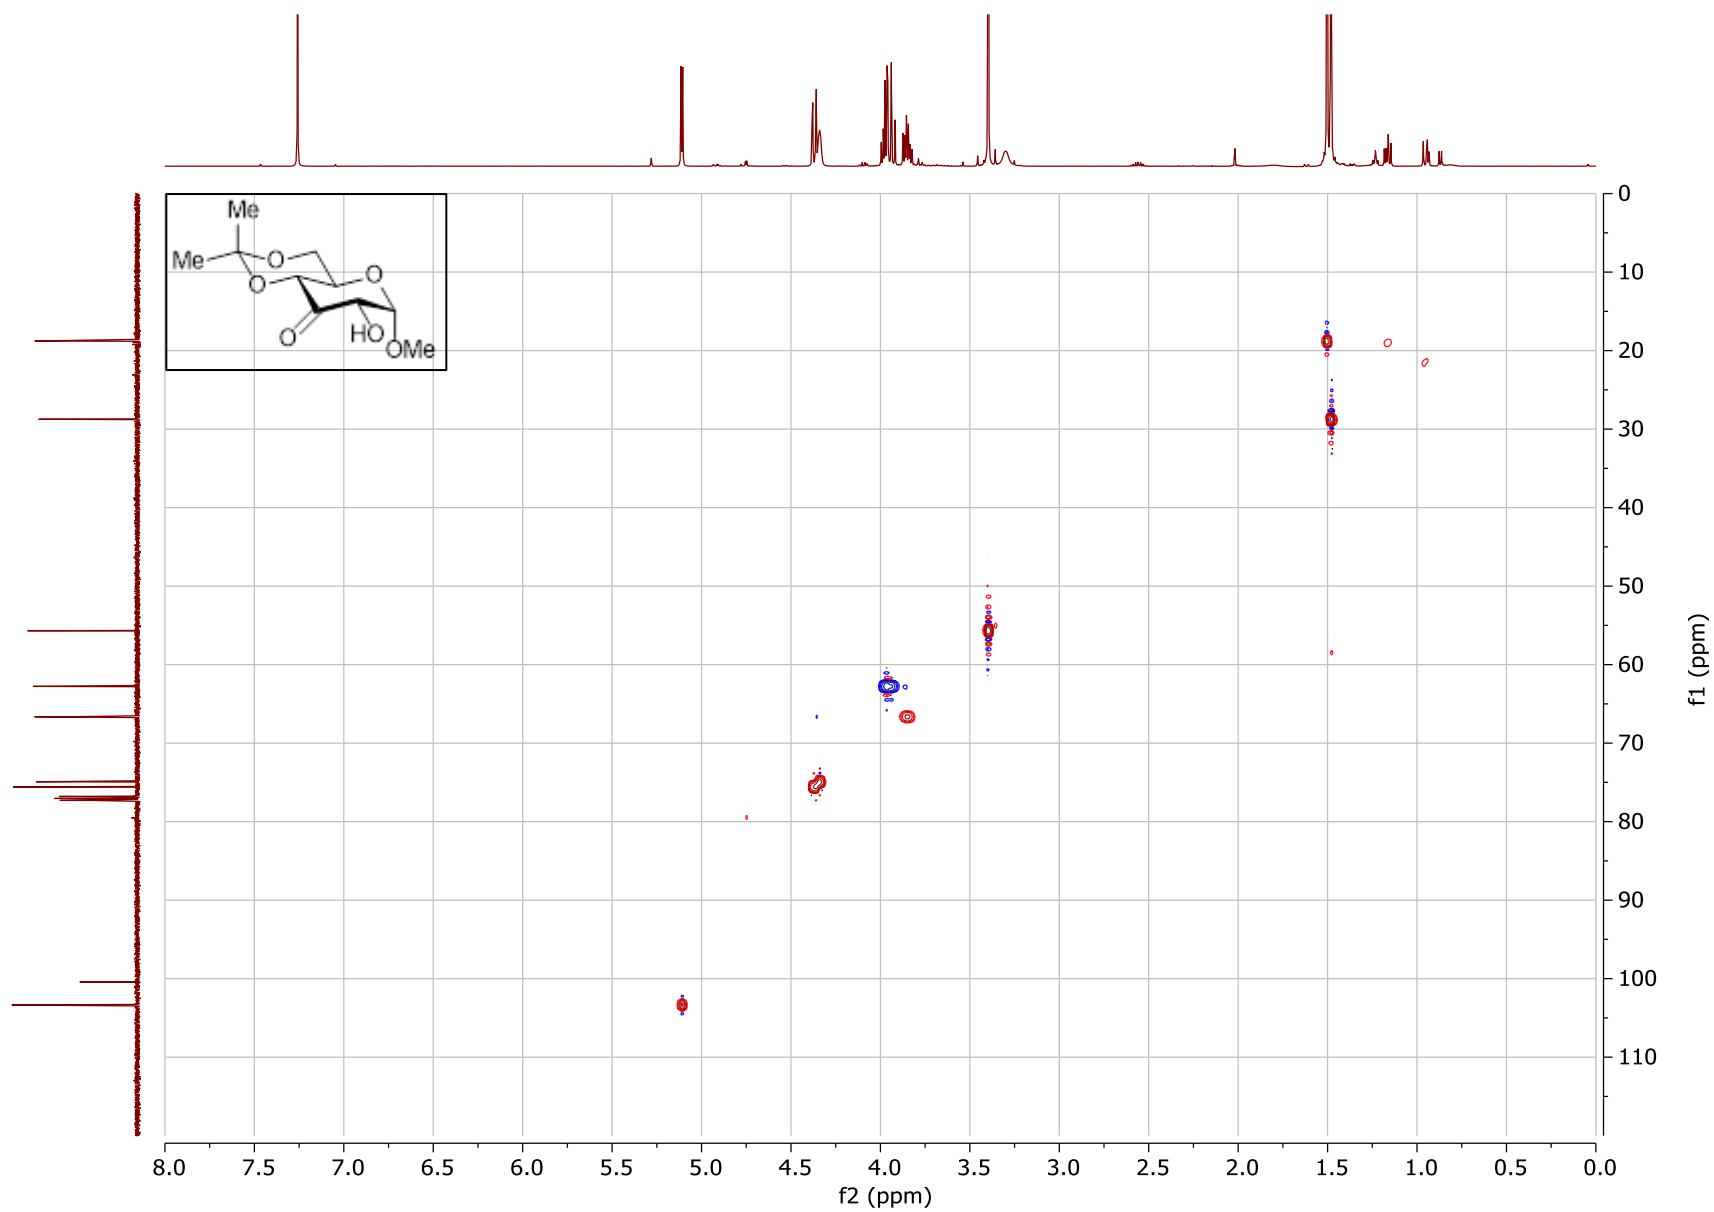



2d – <sup>1</sup>H NMR (500 MHz, CD<sub>3</sub>OD)

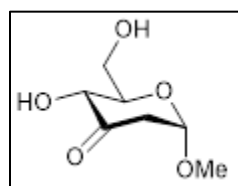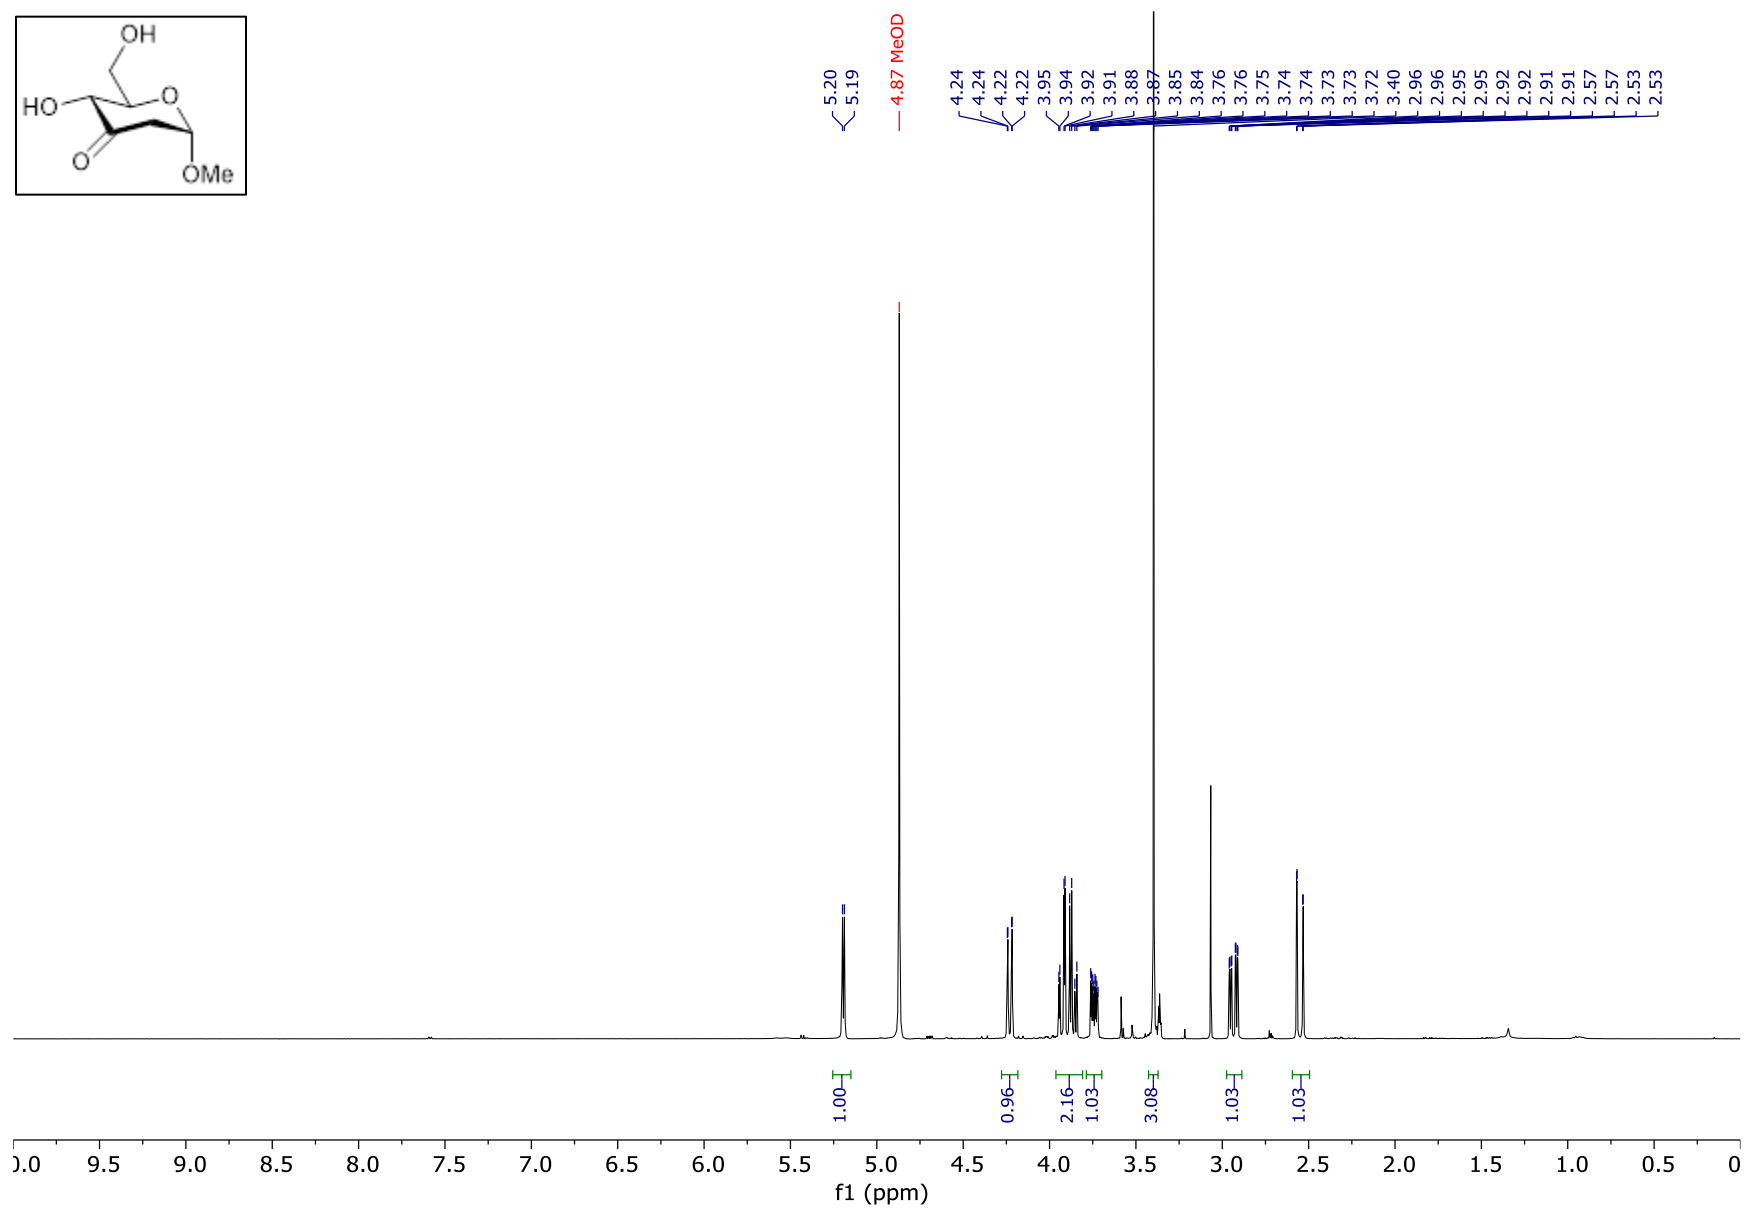

2d –  $^{13}\text{C}$  NMR (126 MHz,  $\text{CD}_3\text{OD}$ )

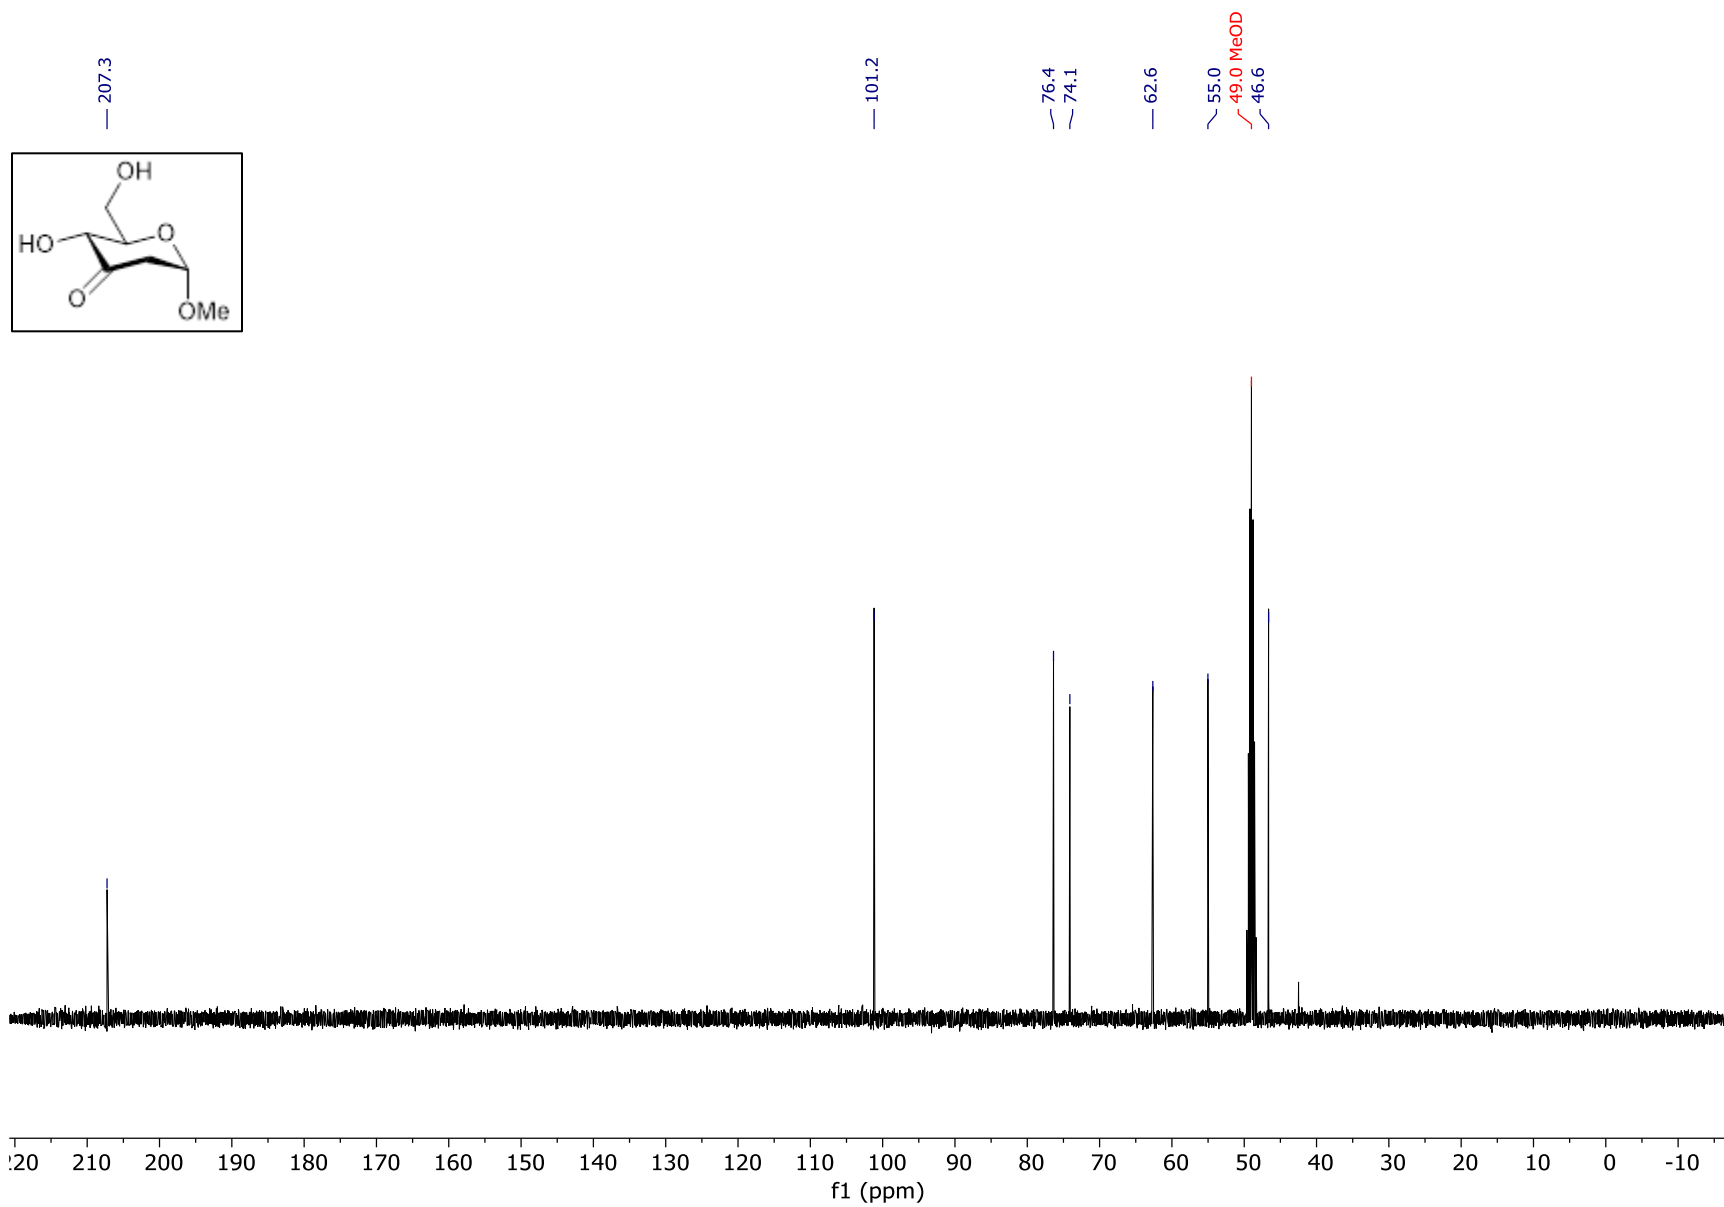

2e – <sup>1</sup>H NMR (500 MHz, CD<sub>3</sub>CN)

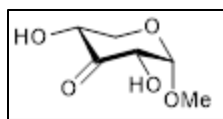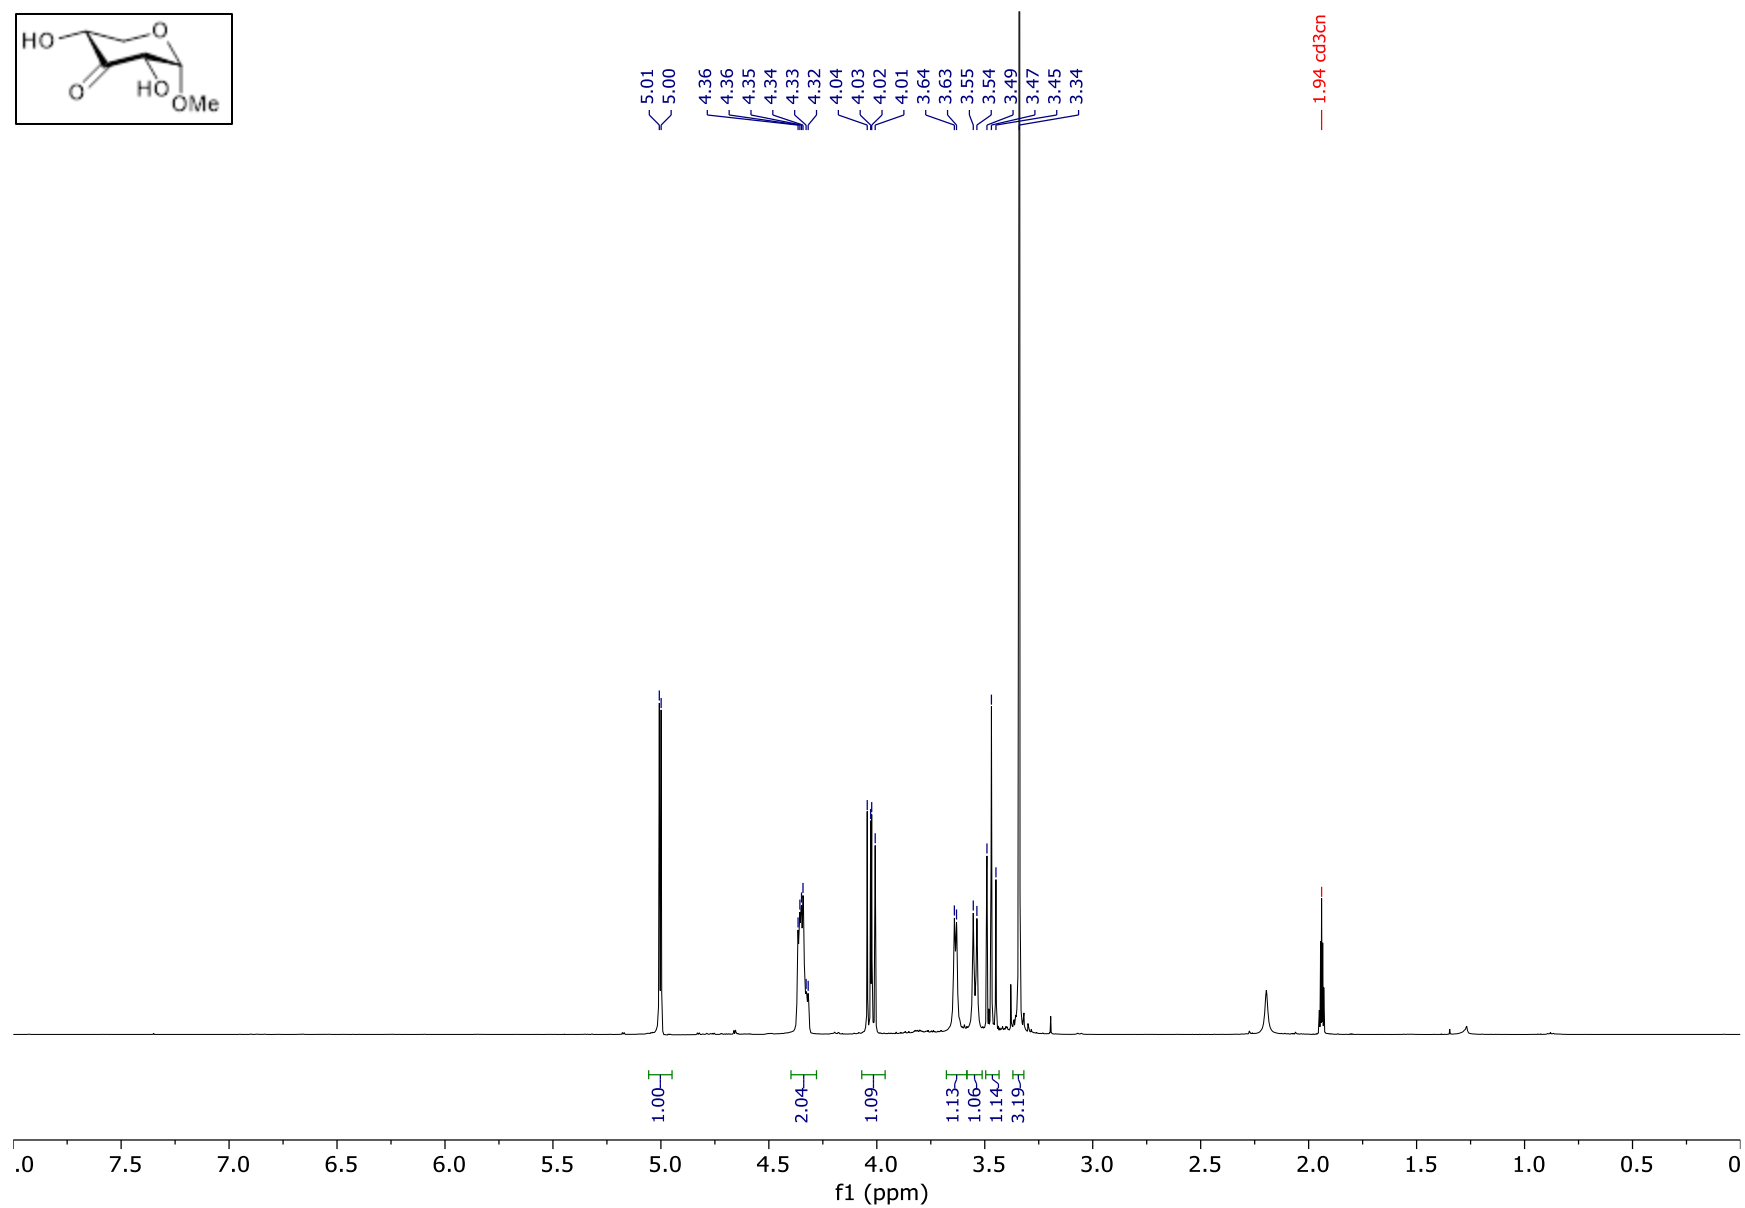

2e -  $^{13}\text{C}$  NMR (126 MHz,  $\text{CD}_3\text{CN}$ )

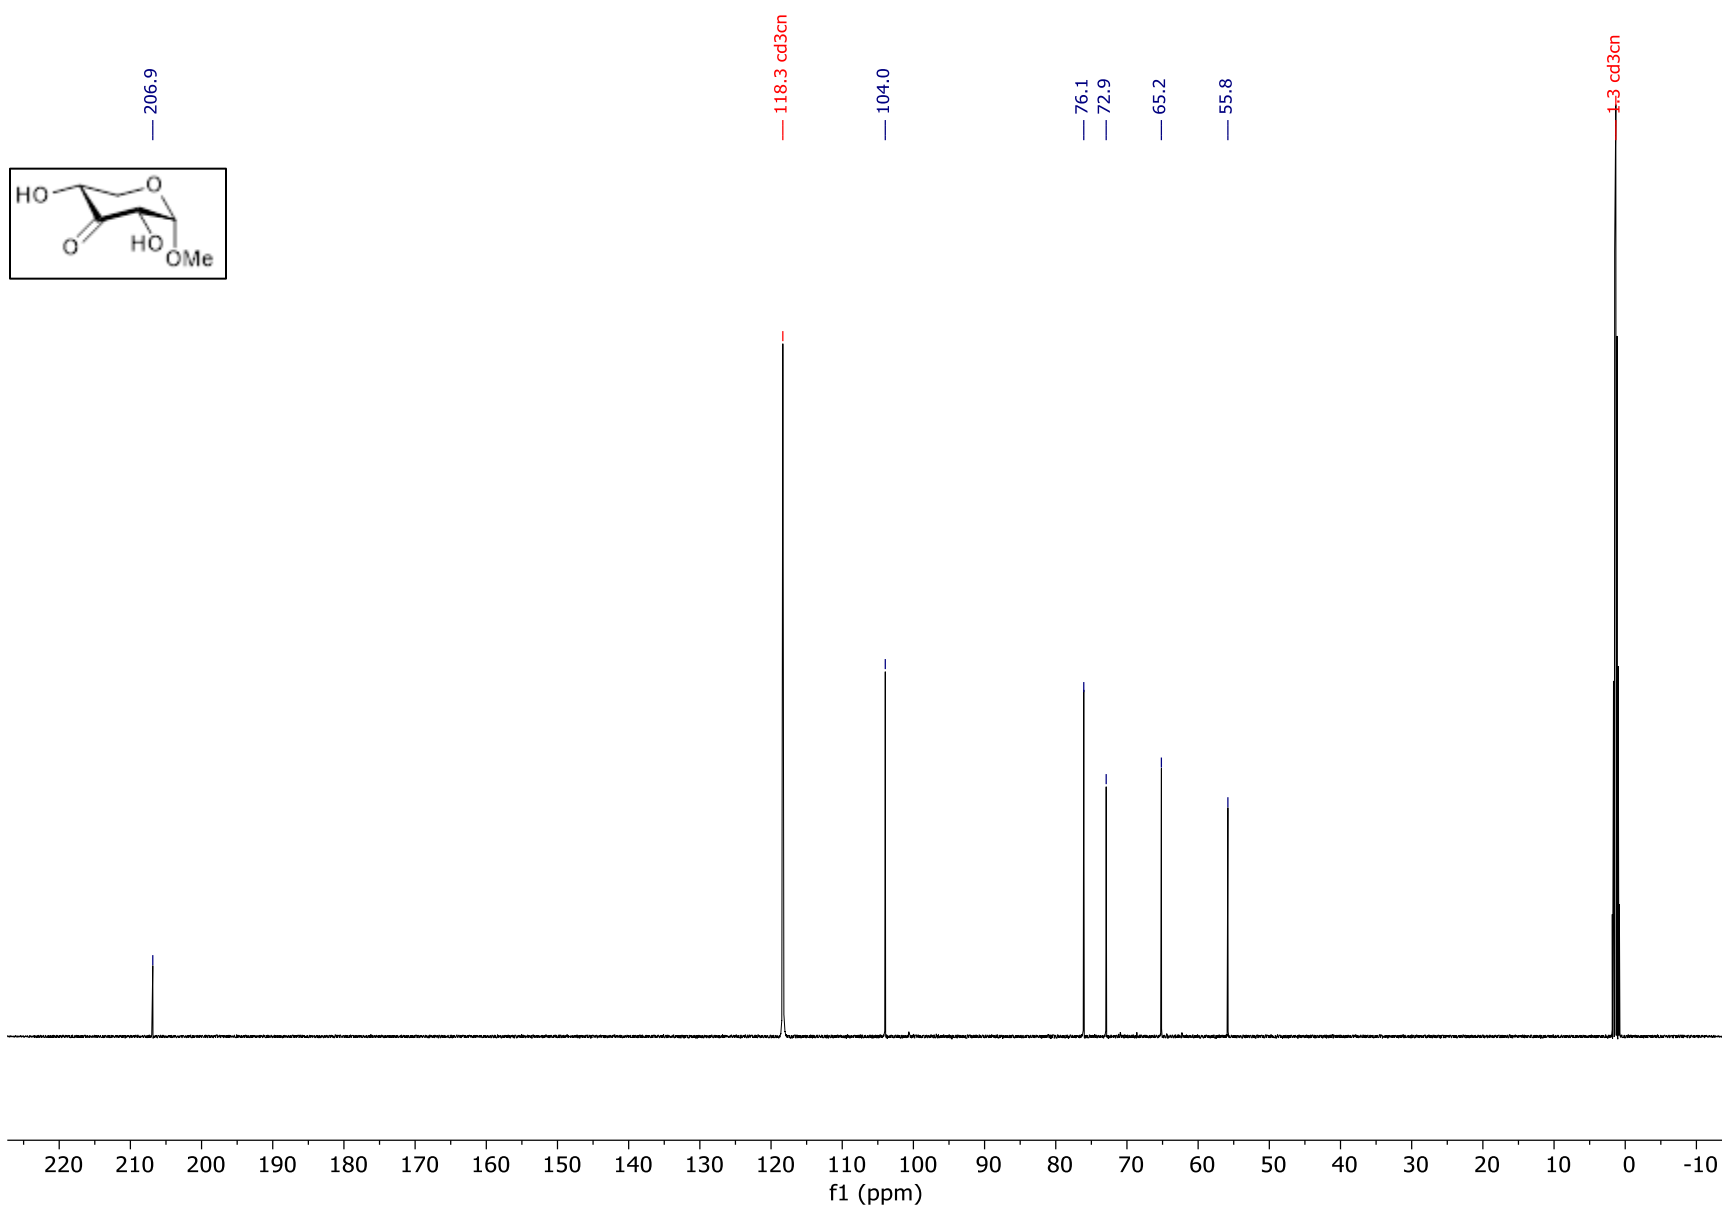

2f - <sup>1</sup>H NMR (500 MHz, CDCl<sub>3</sub>)

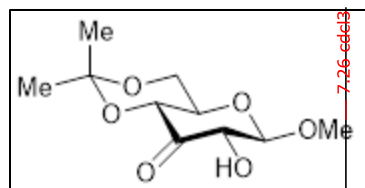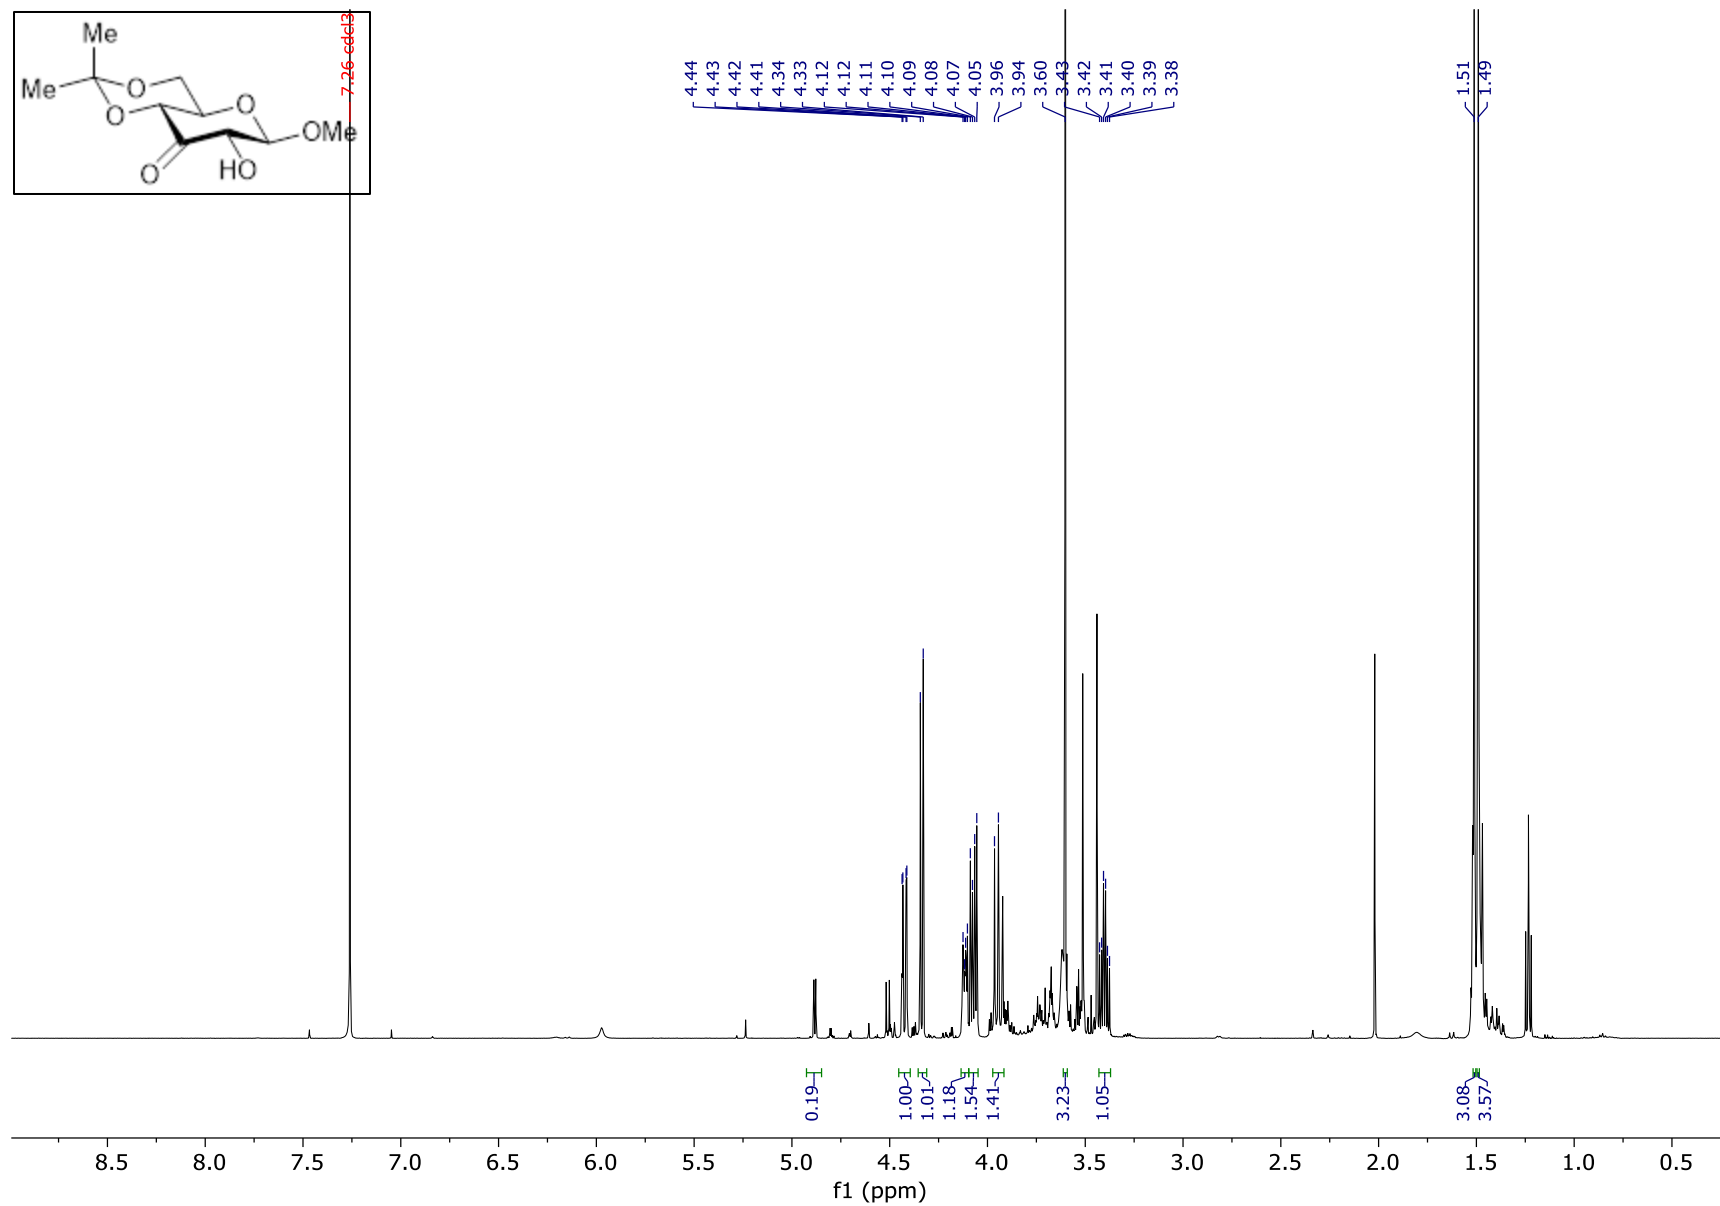

2f – <sup>13</sup>C NMR (126 MHz, CDCl<sub>3</sub>)

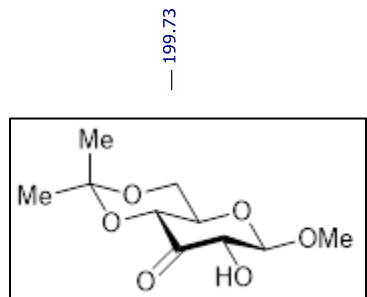

199.73

107.08

100.58

77.32  
77.16 cdc13  
75.30

67.85

62.53

57.85

28.76

18.79

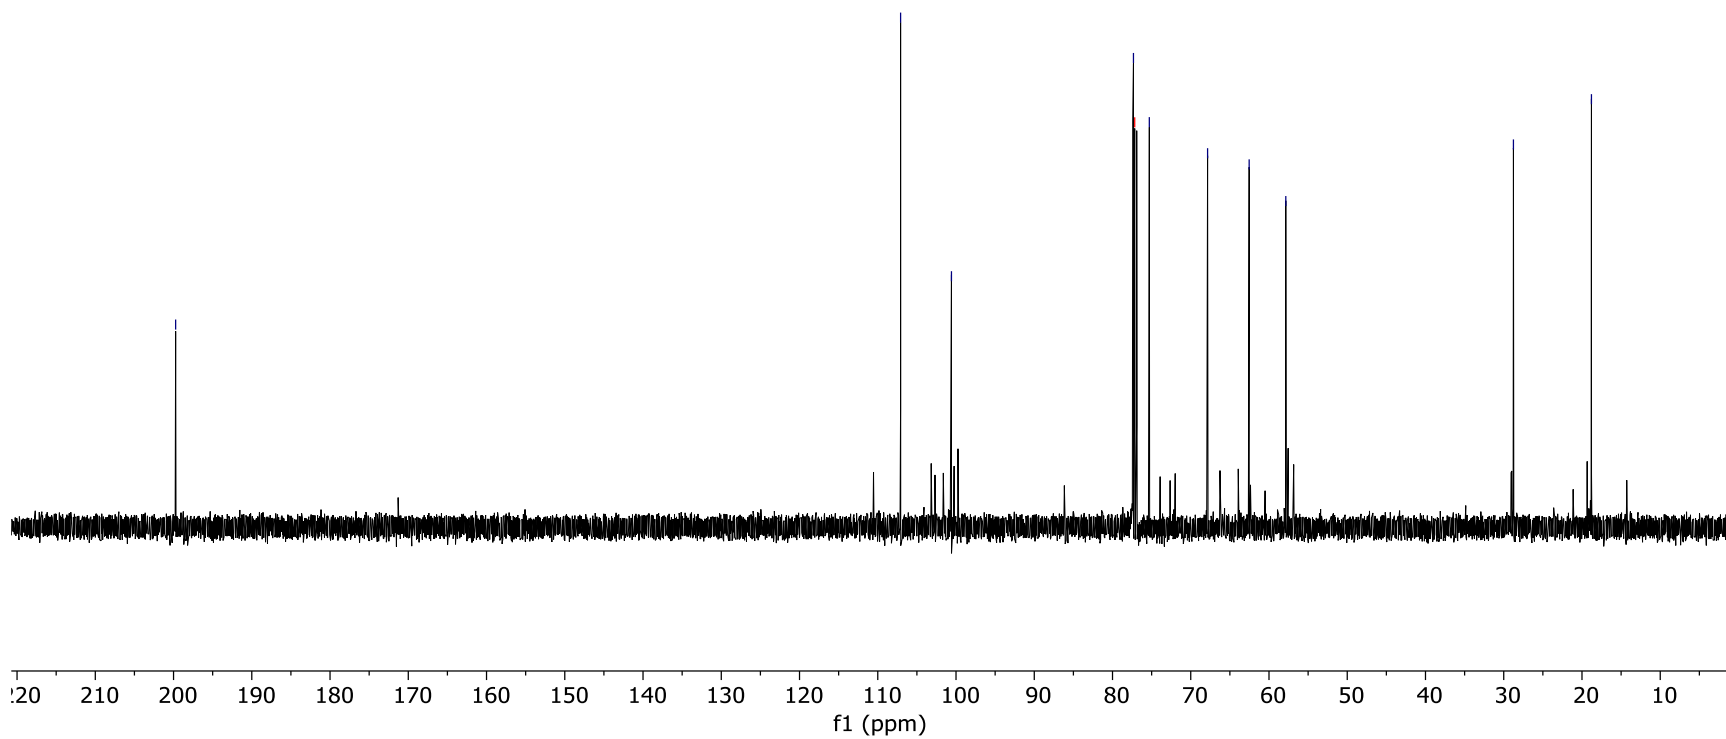

2f - COSY (500 MHz, CDCl<sub>3</sub>)

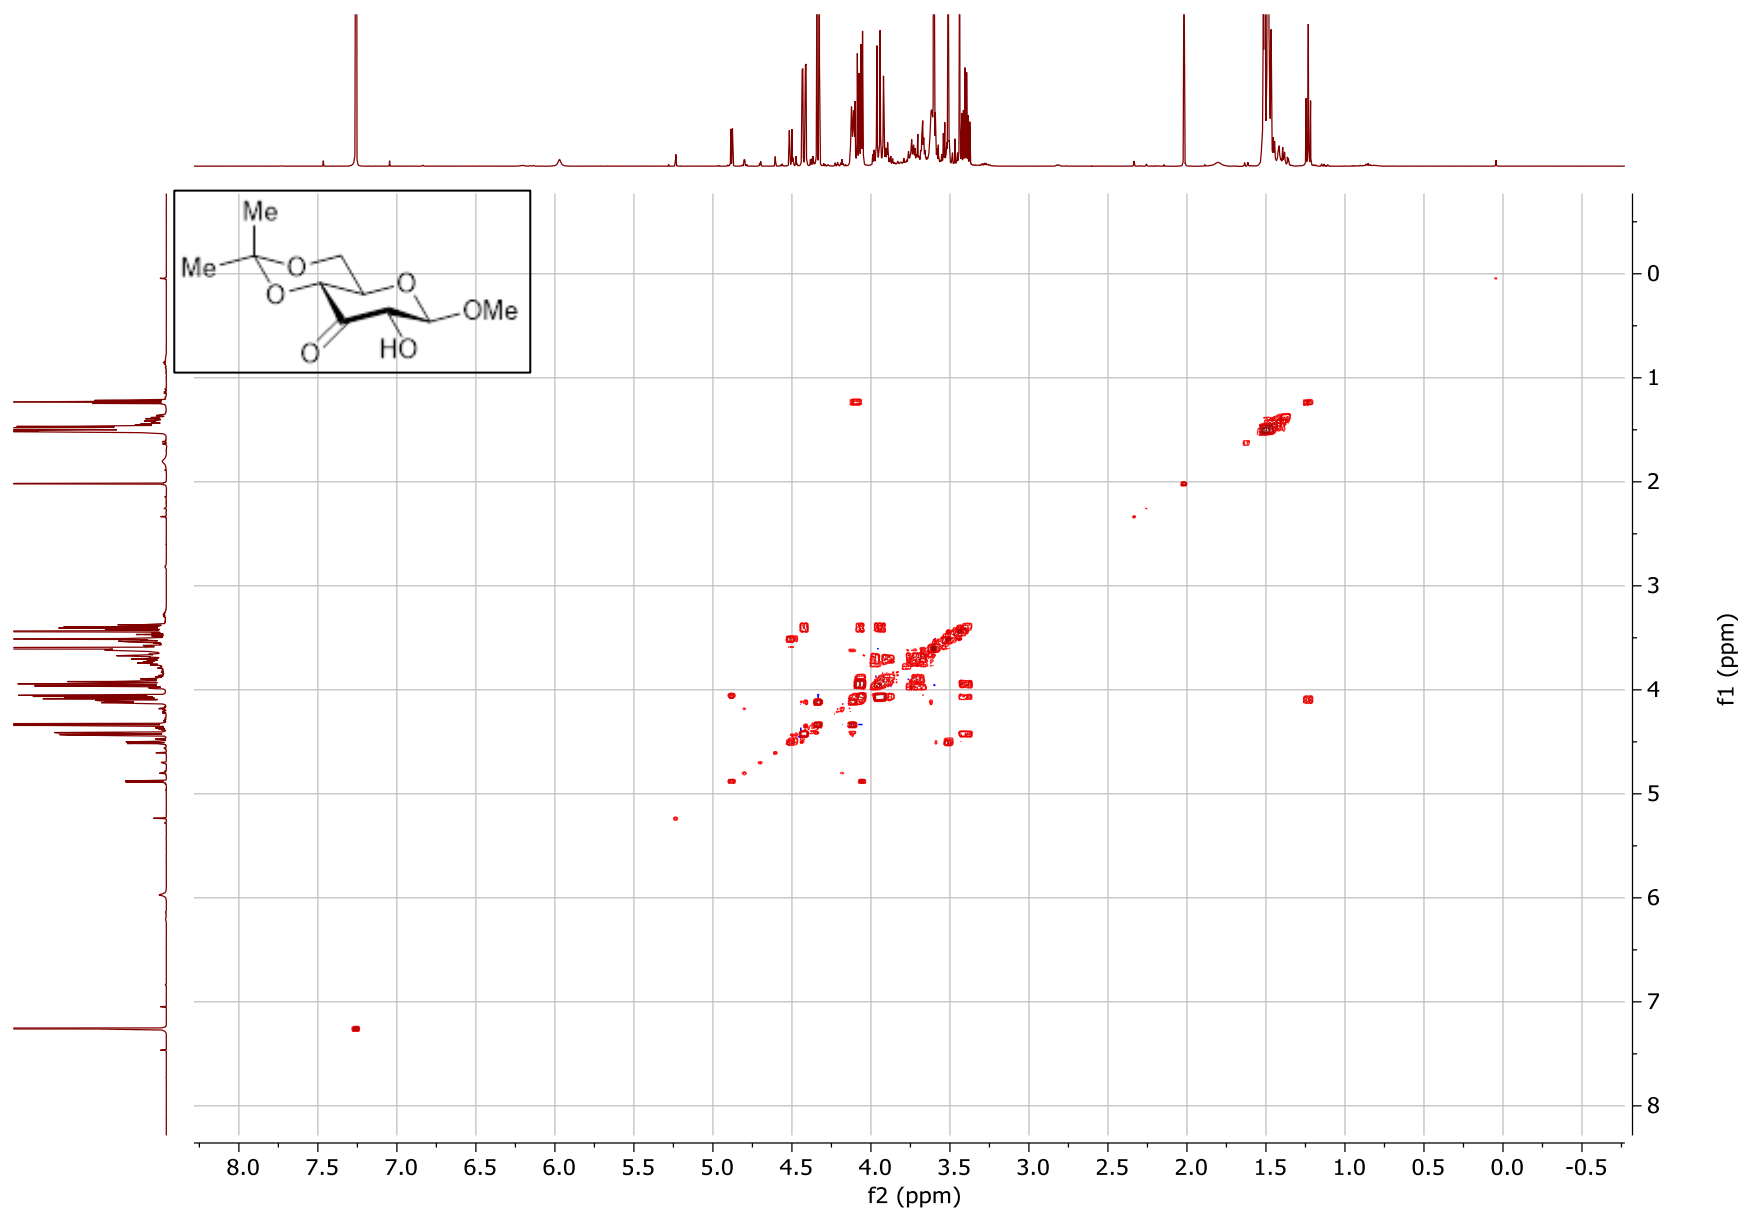

2f - HSQC (500 MHz, CDCl<sub>3</sub>)

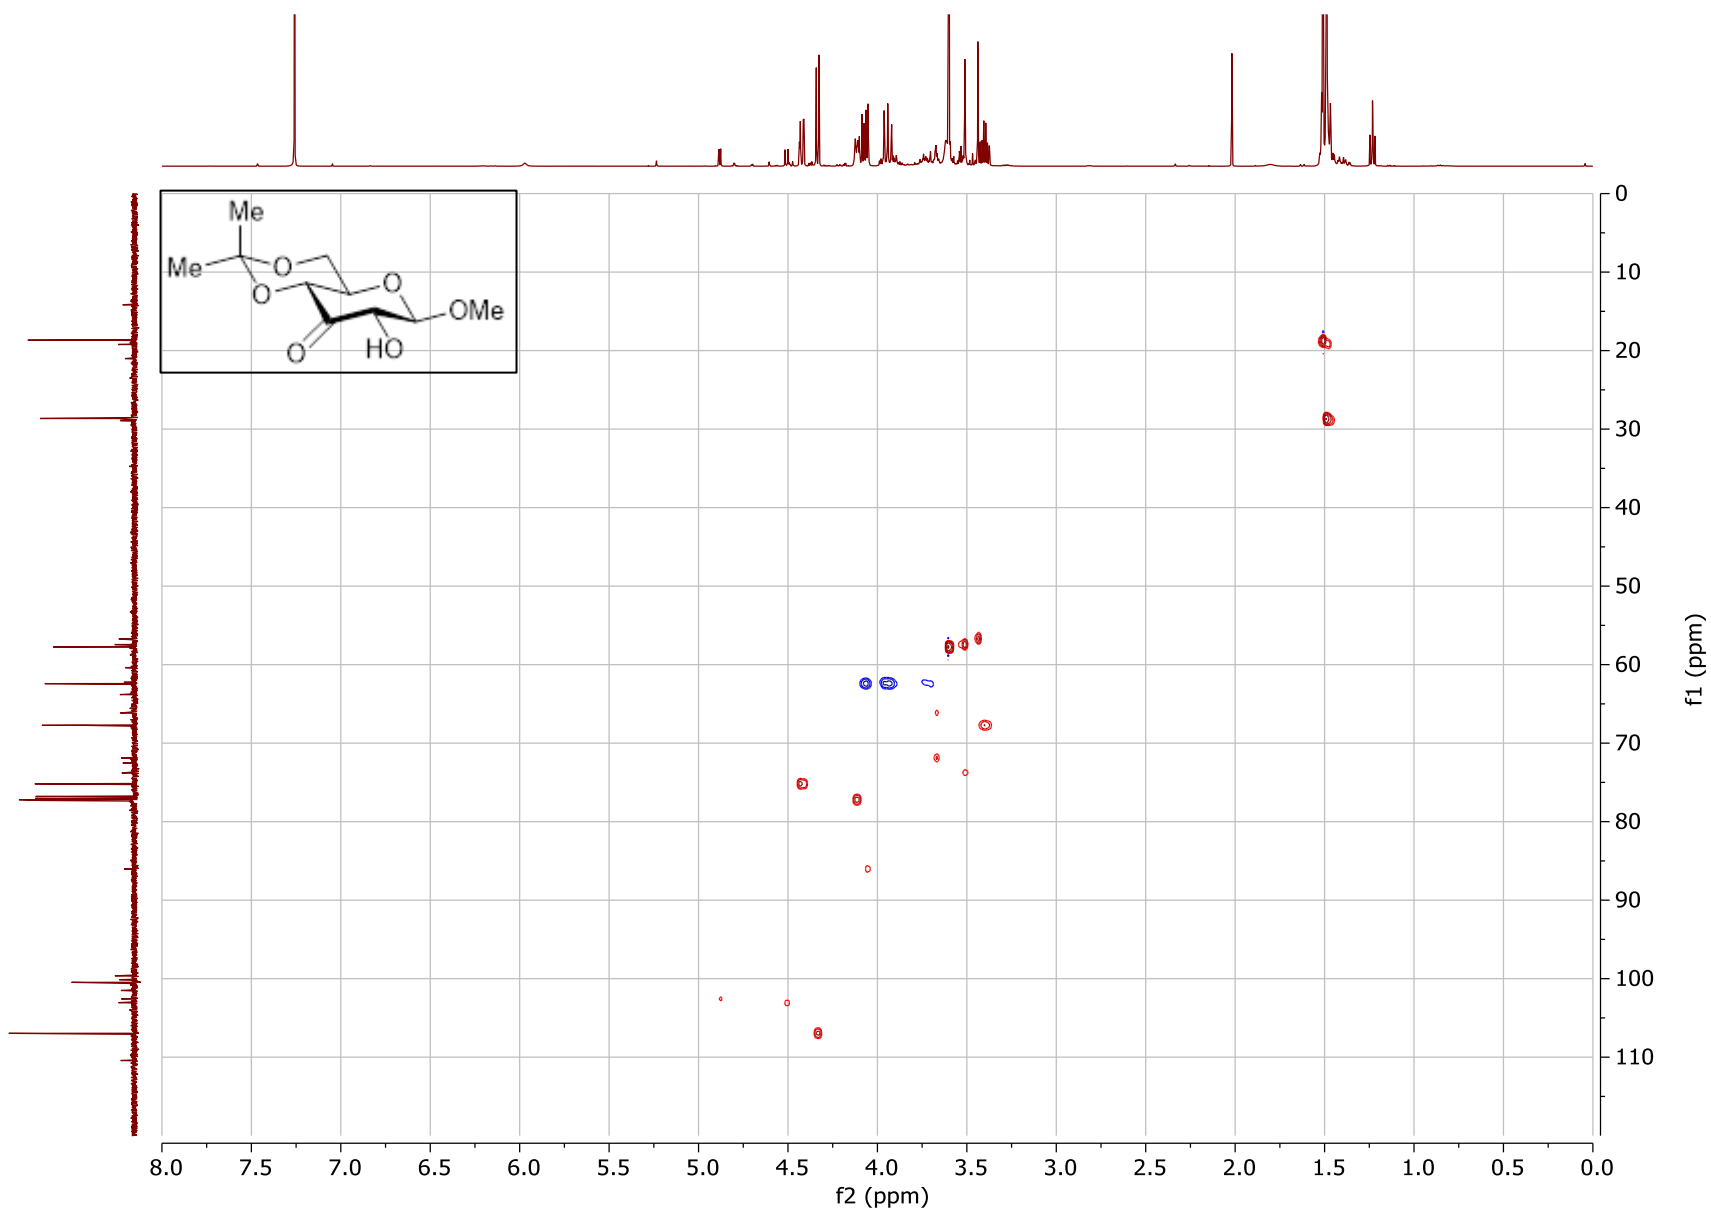



2g - <sup>1</sup>H NMR (500 MHz, CDCl<sub>3</sub>)

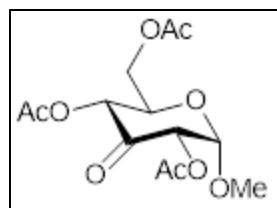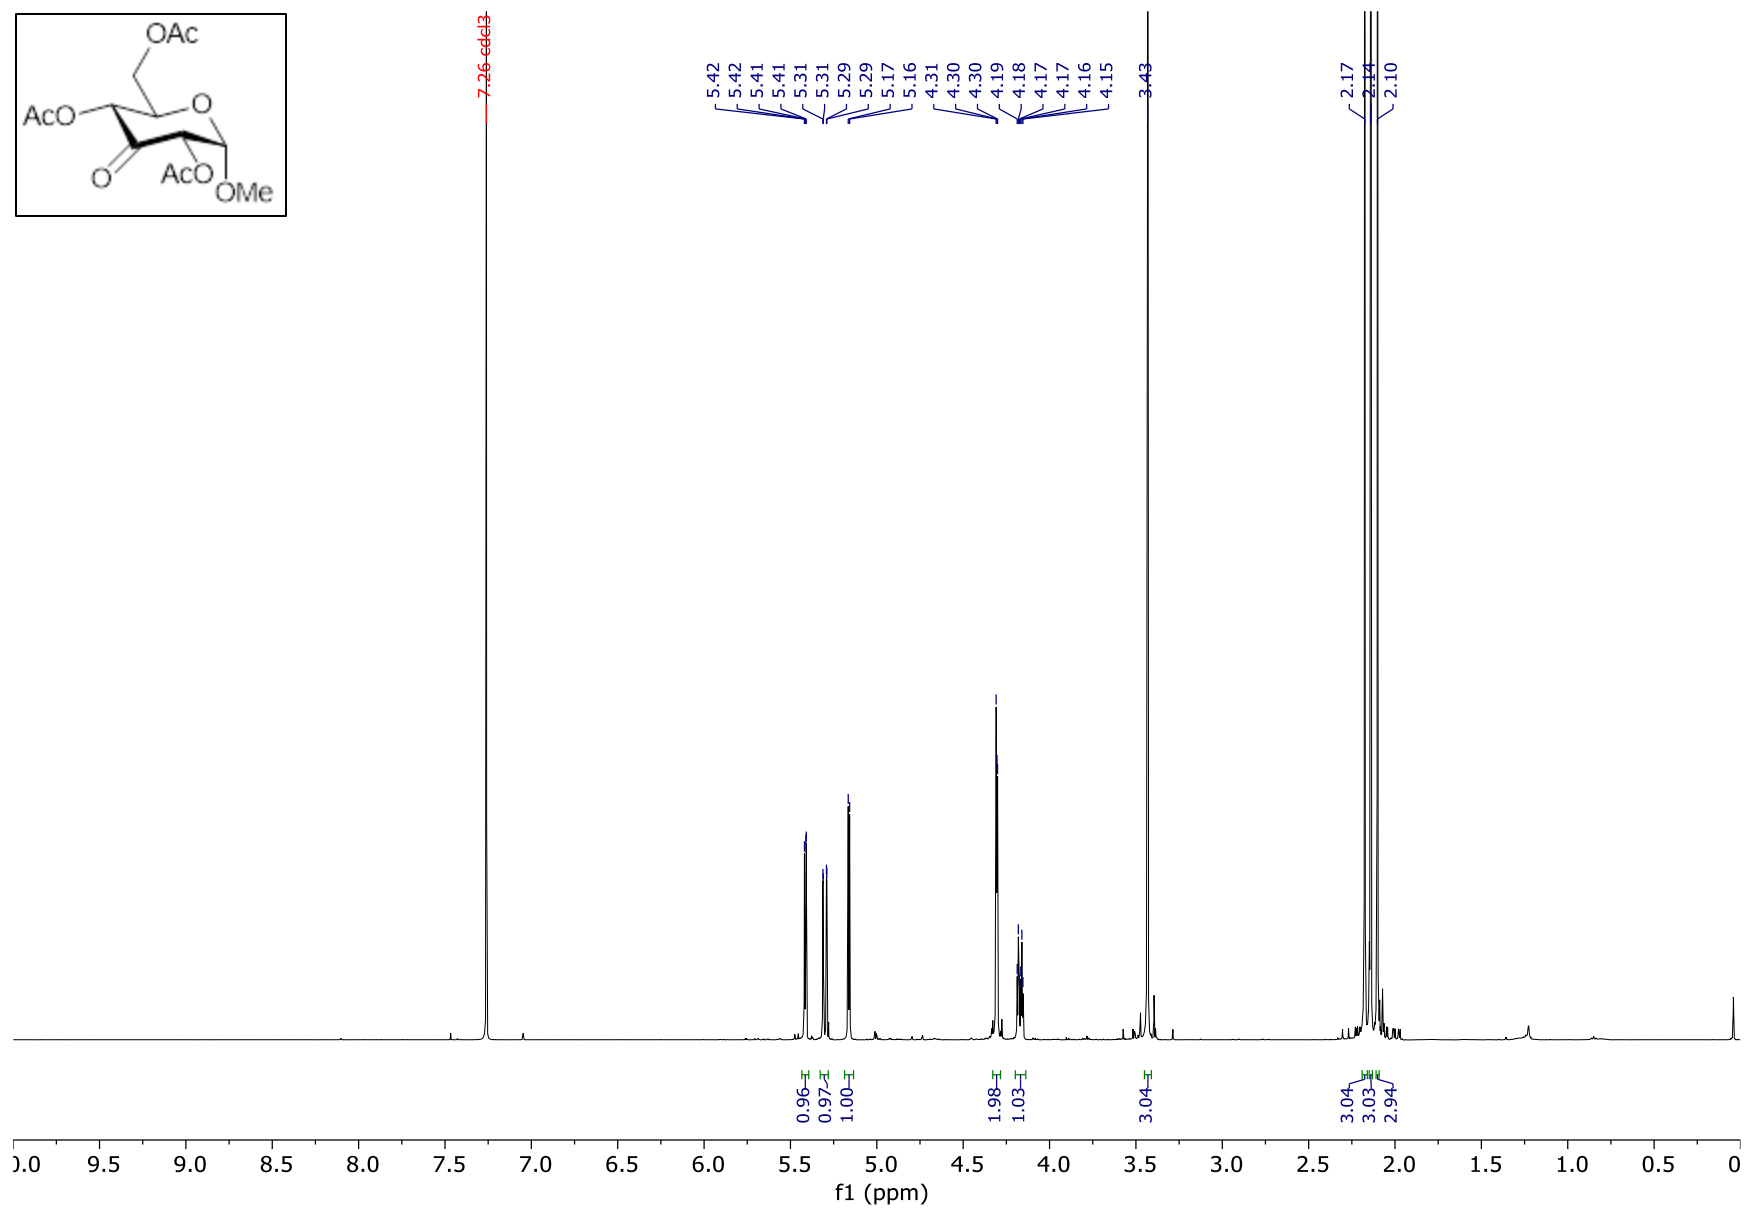

2g – <sup>13</sup>C NMR (126 MHz, CDCl<sub>3</sub>)

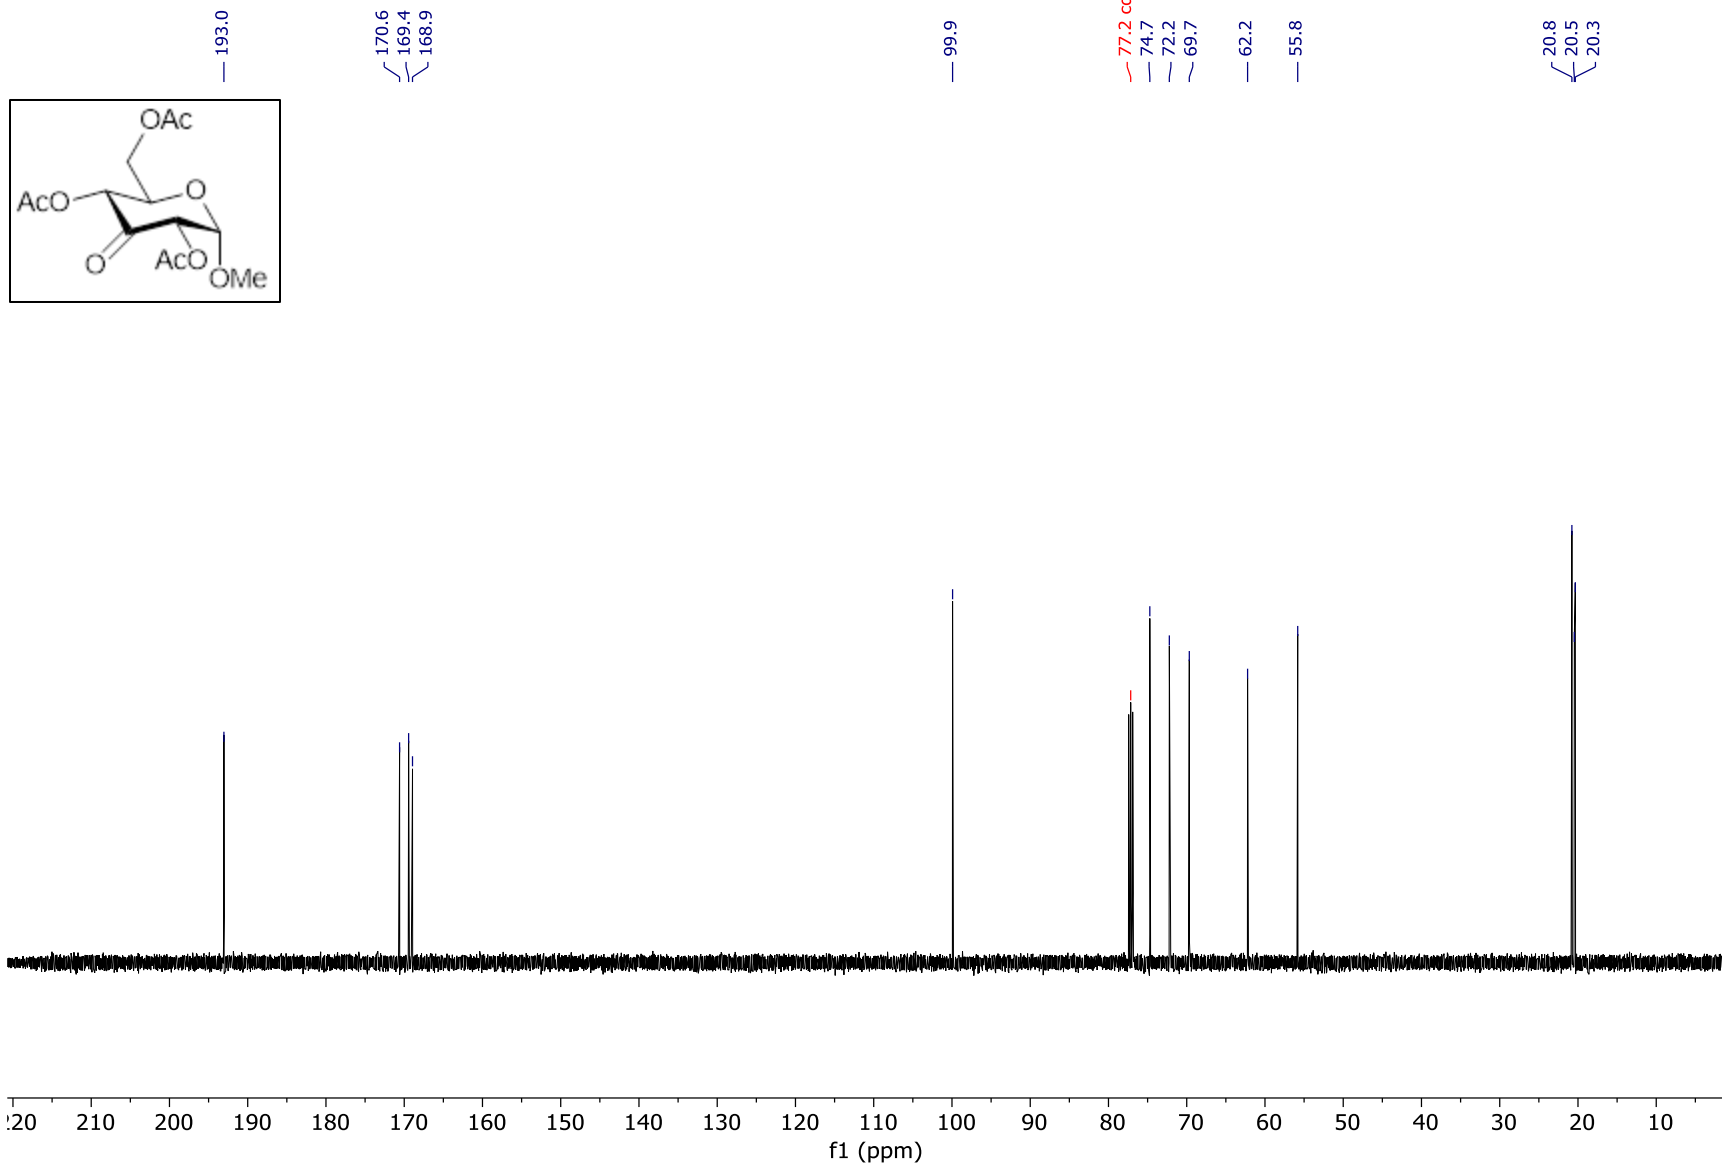

2g – COSY (500 MHz, CDCl<sub>3</sub>)

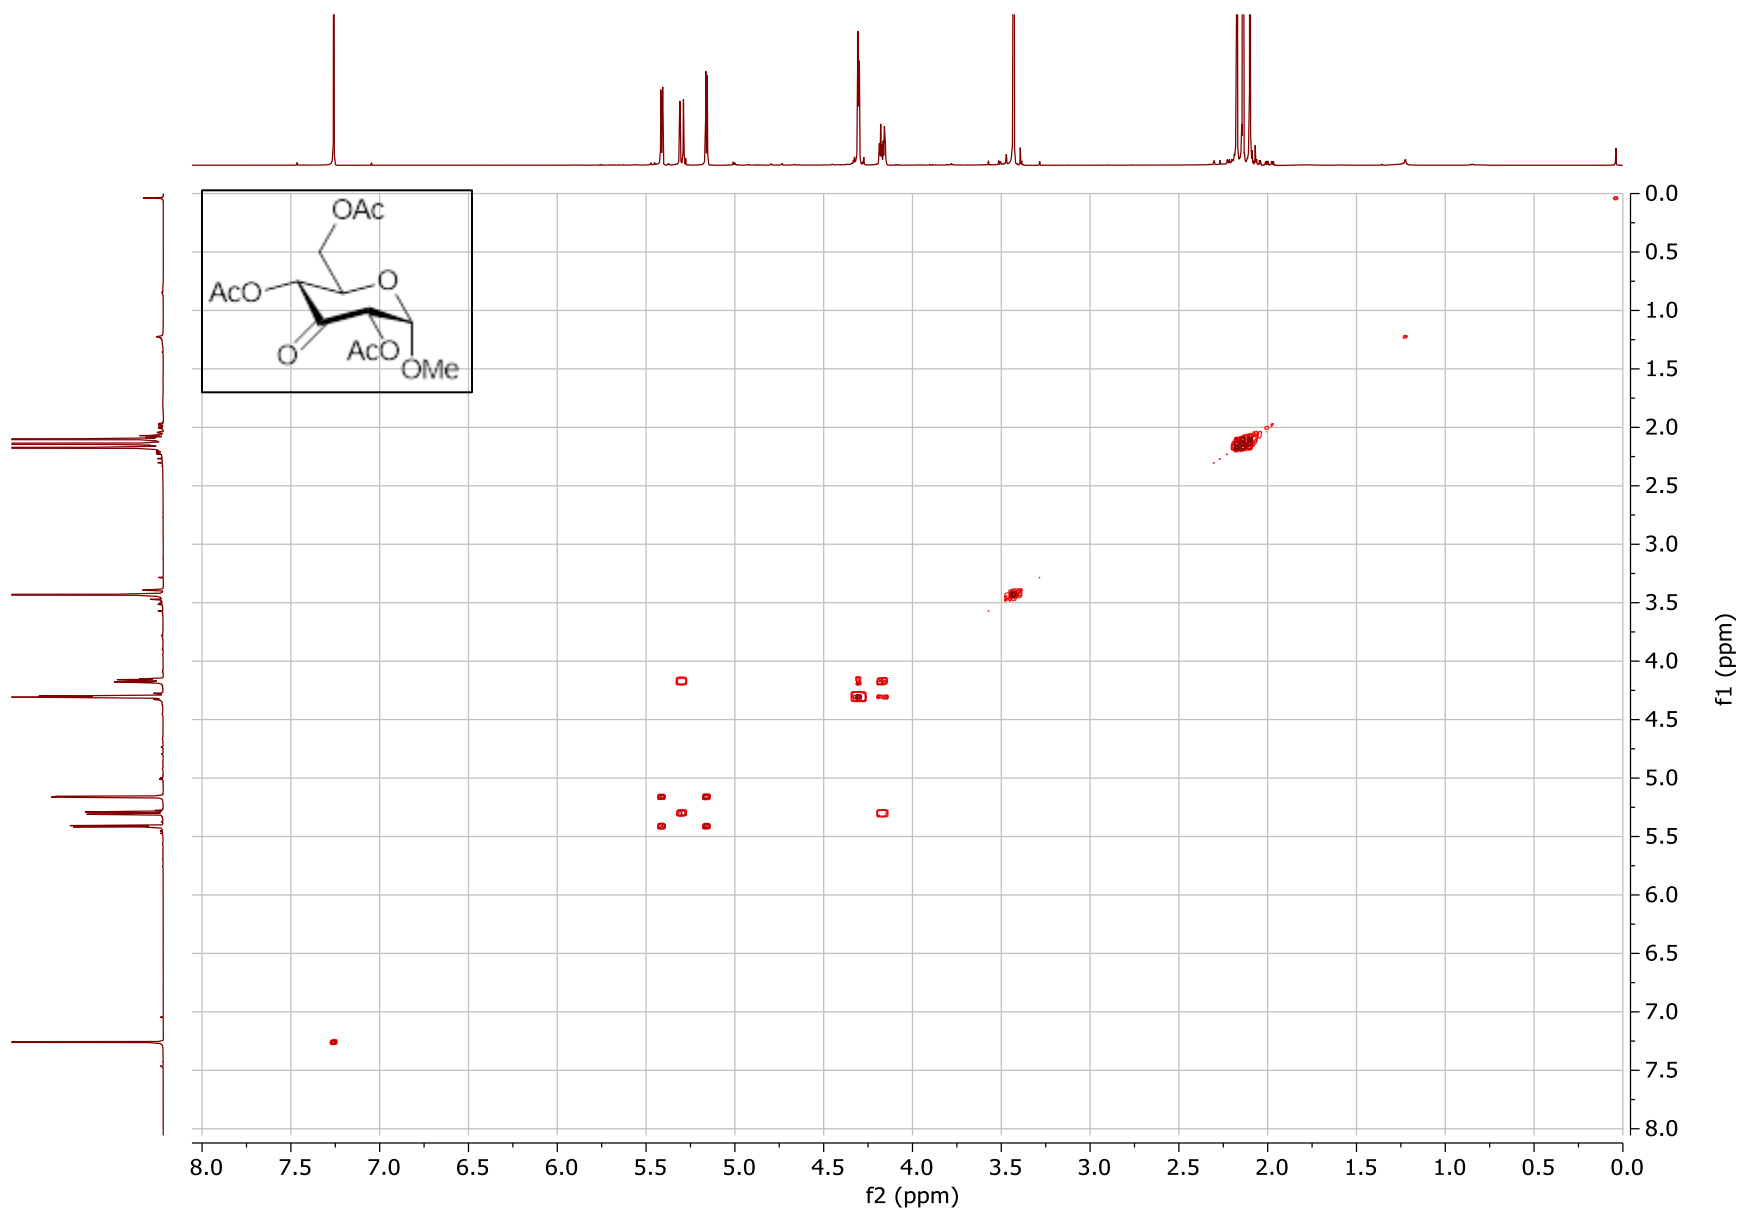

2g – HSQC (500 MHz, CDCl<sub>3</sub>)

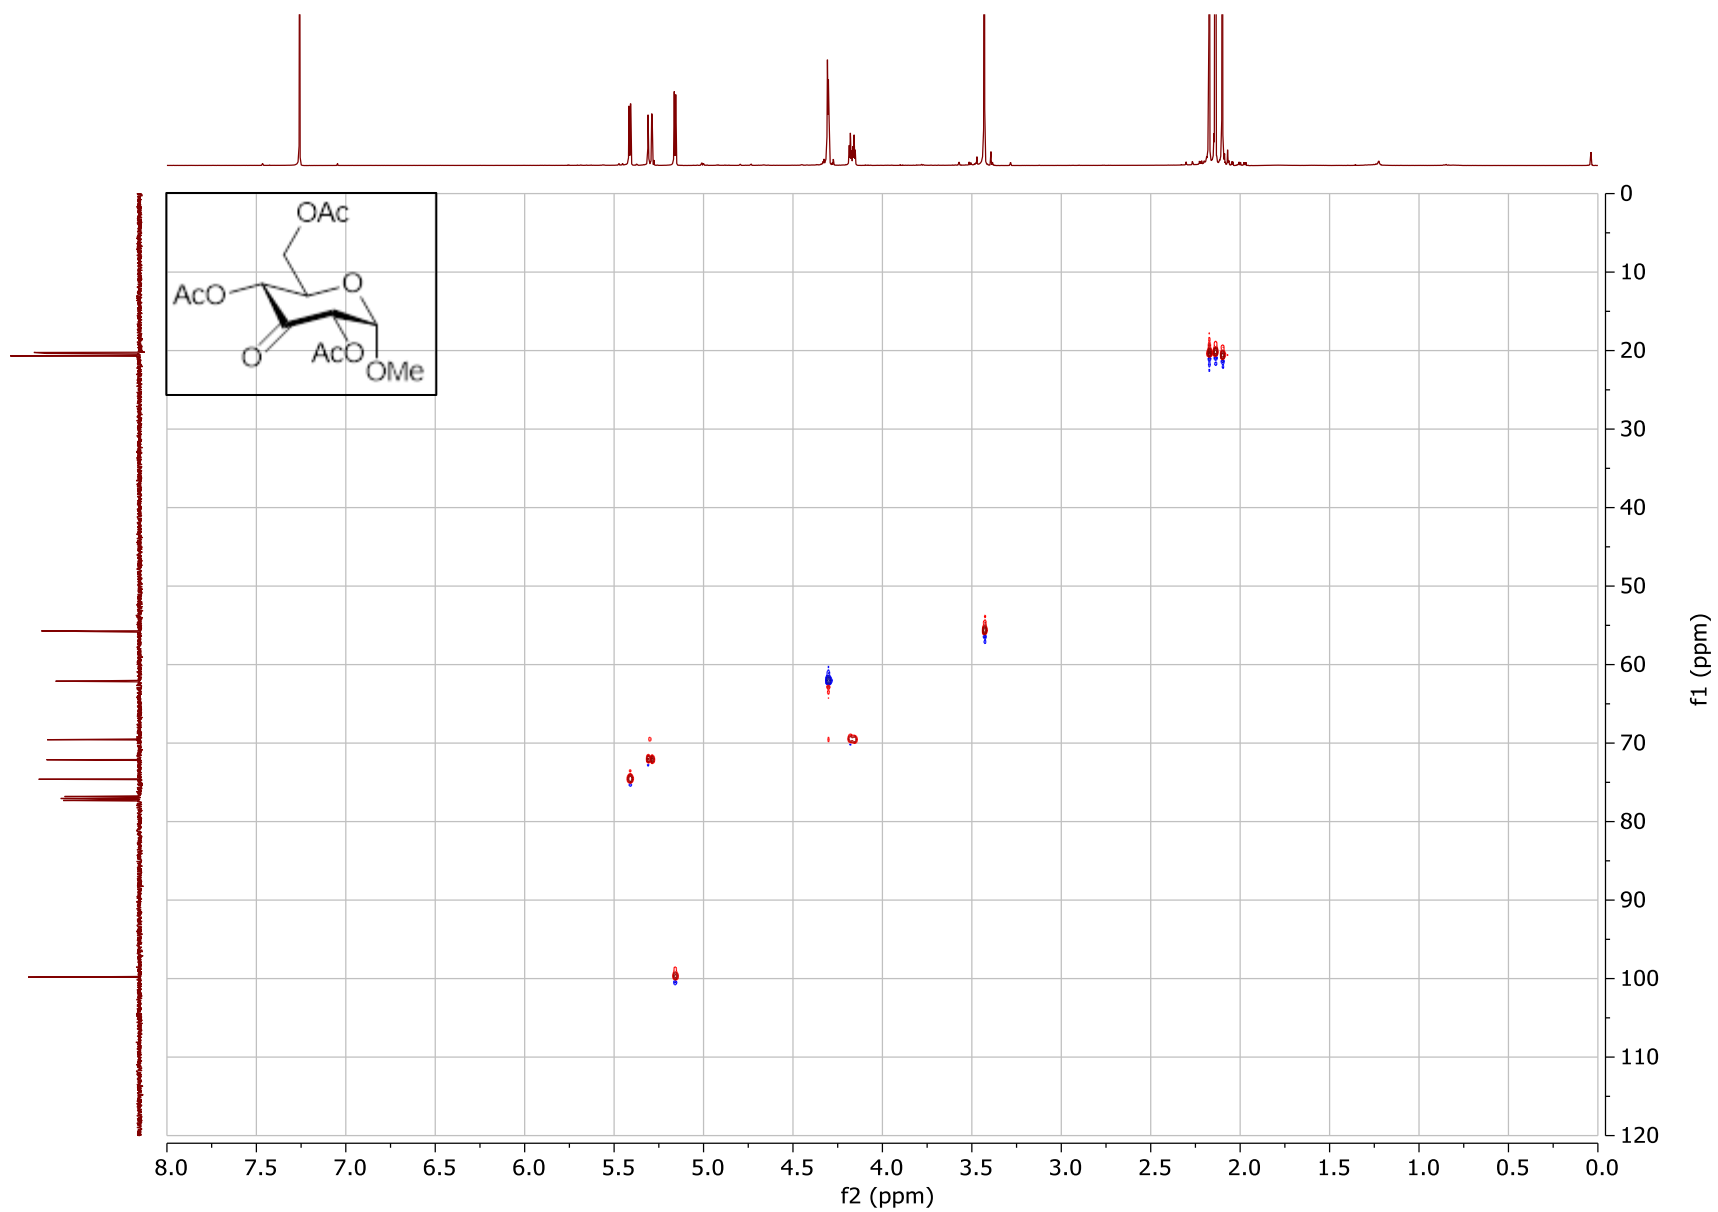

2h - <sup>1</sup>H NMR (500 MHz, CDCl<sub>3</sub>)

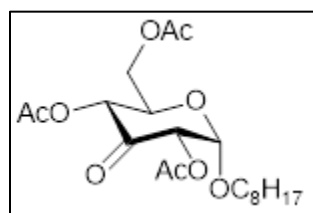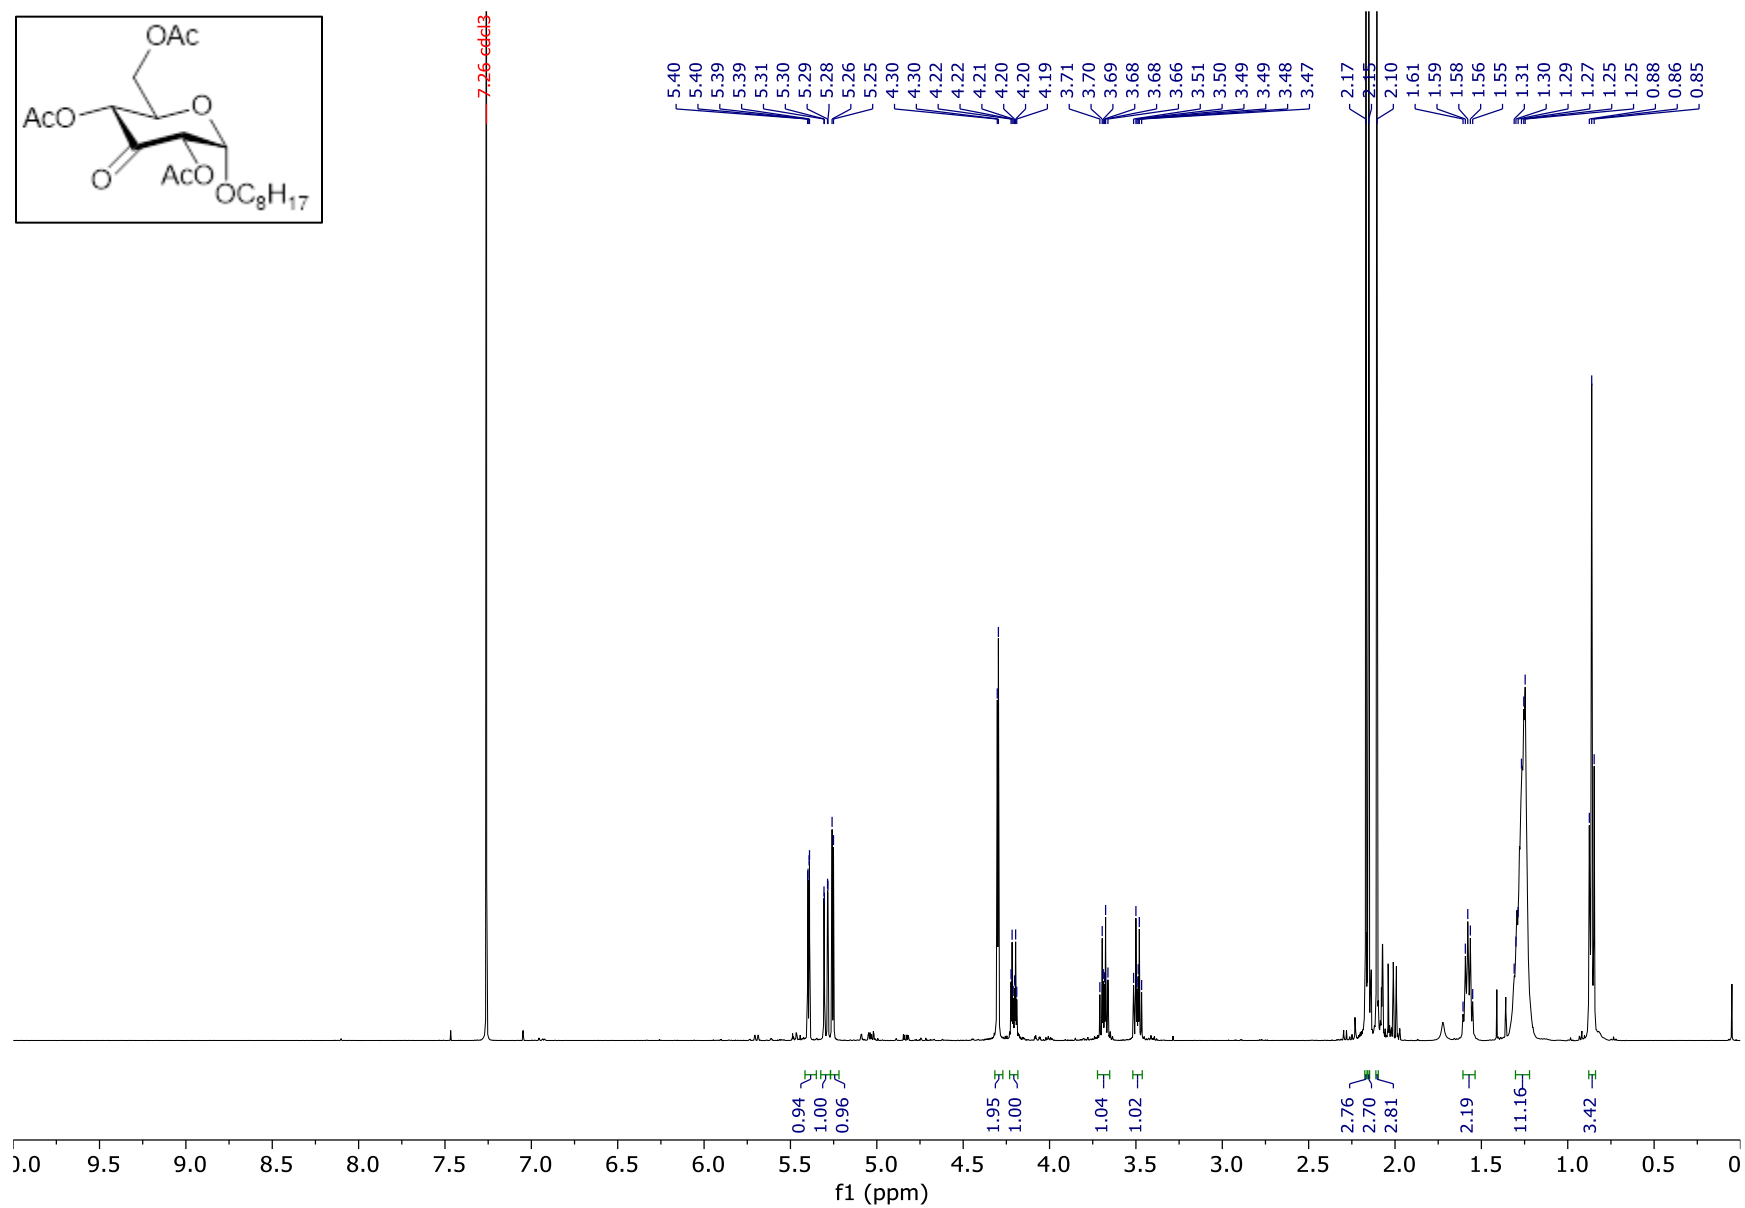

2h -  $^{13}\text{C}$  NMR (126 MHz,  $\text{CDCl}_3$ )

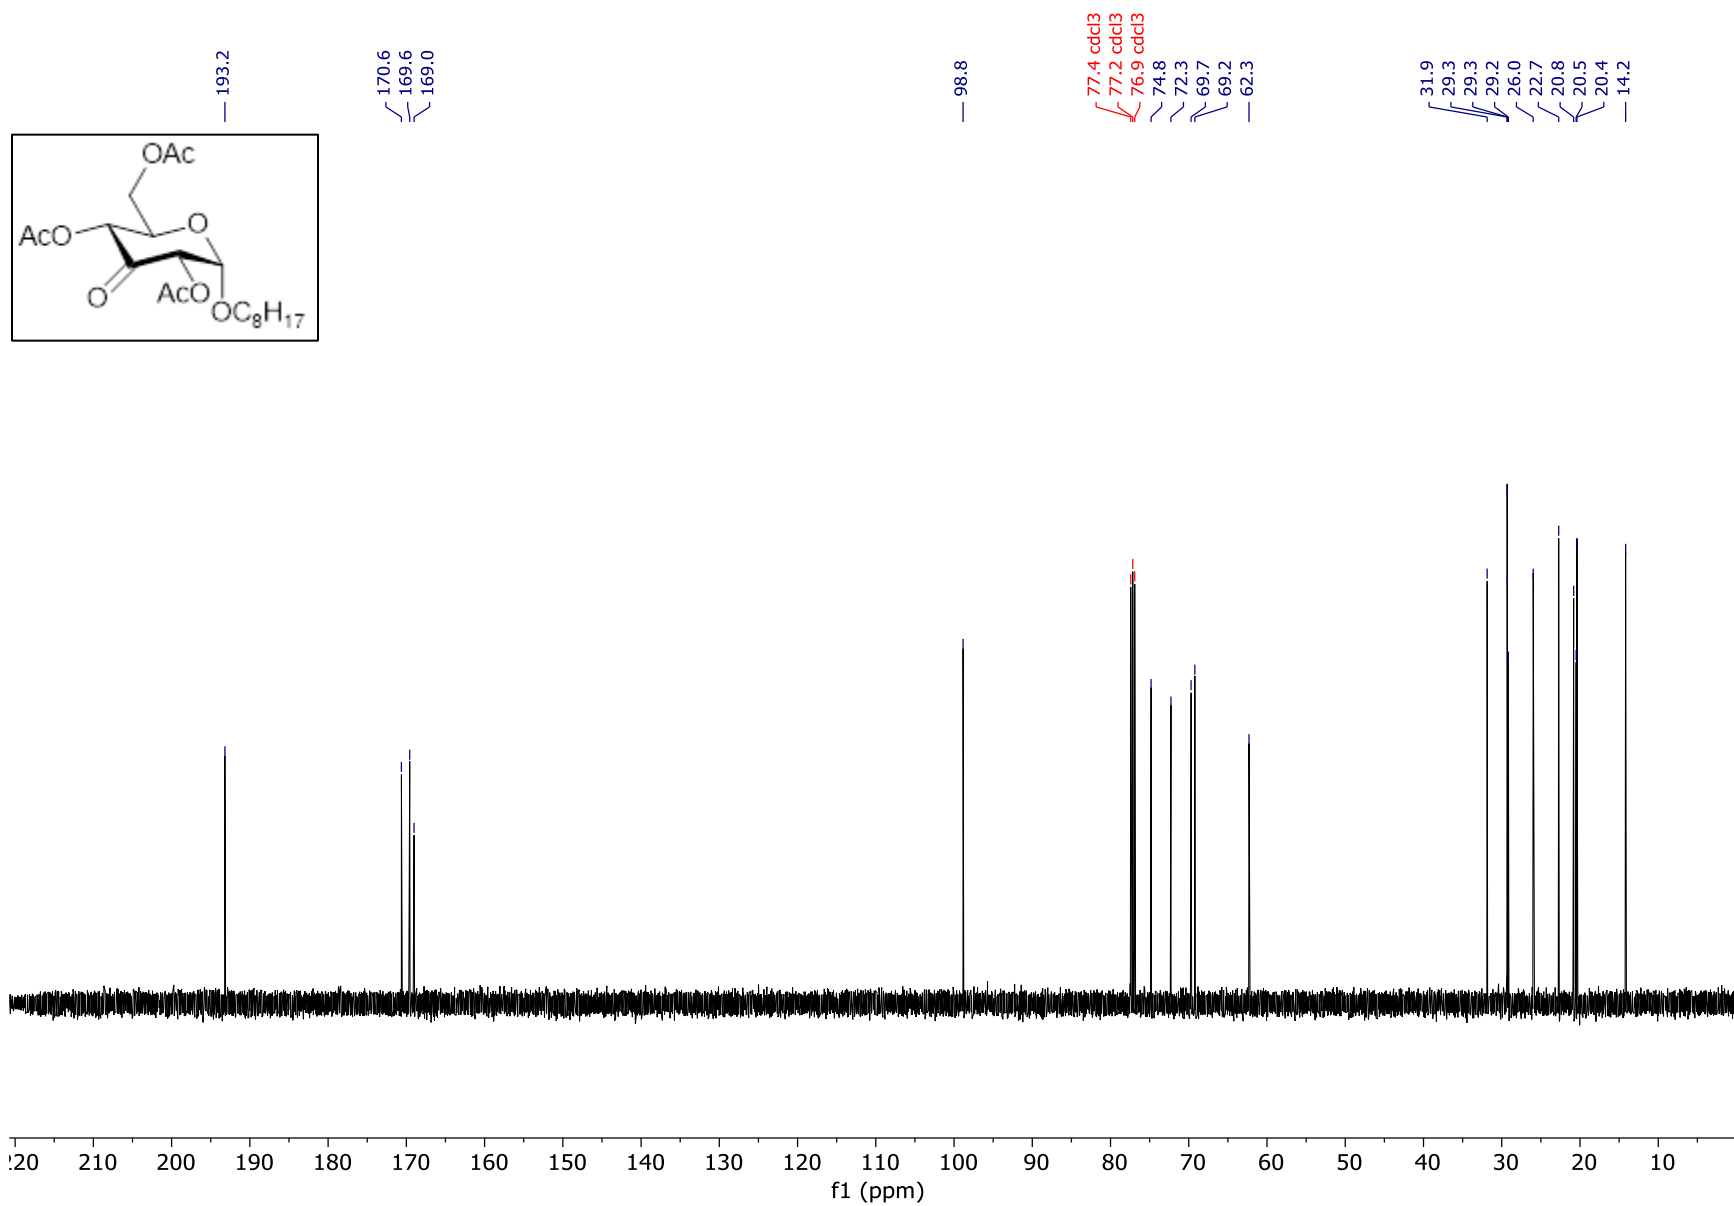

2h - COSY (500 MHz, CDCl<sub>3</sub>)

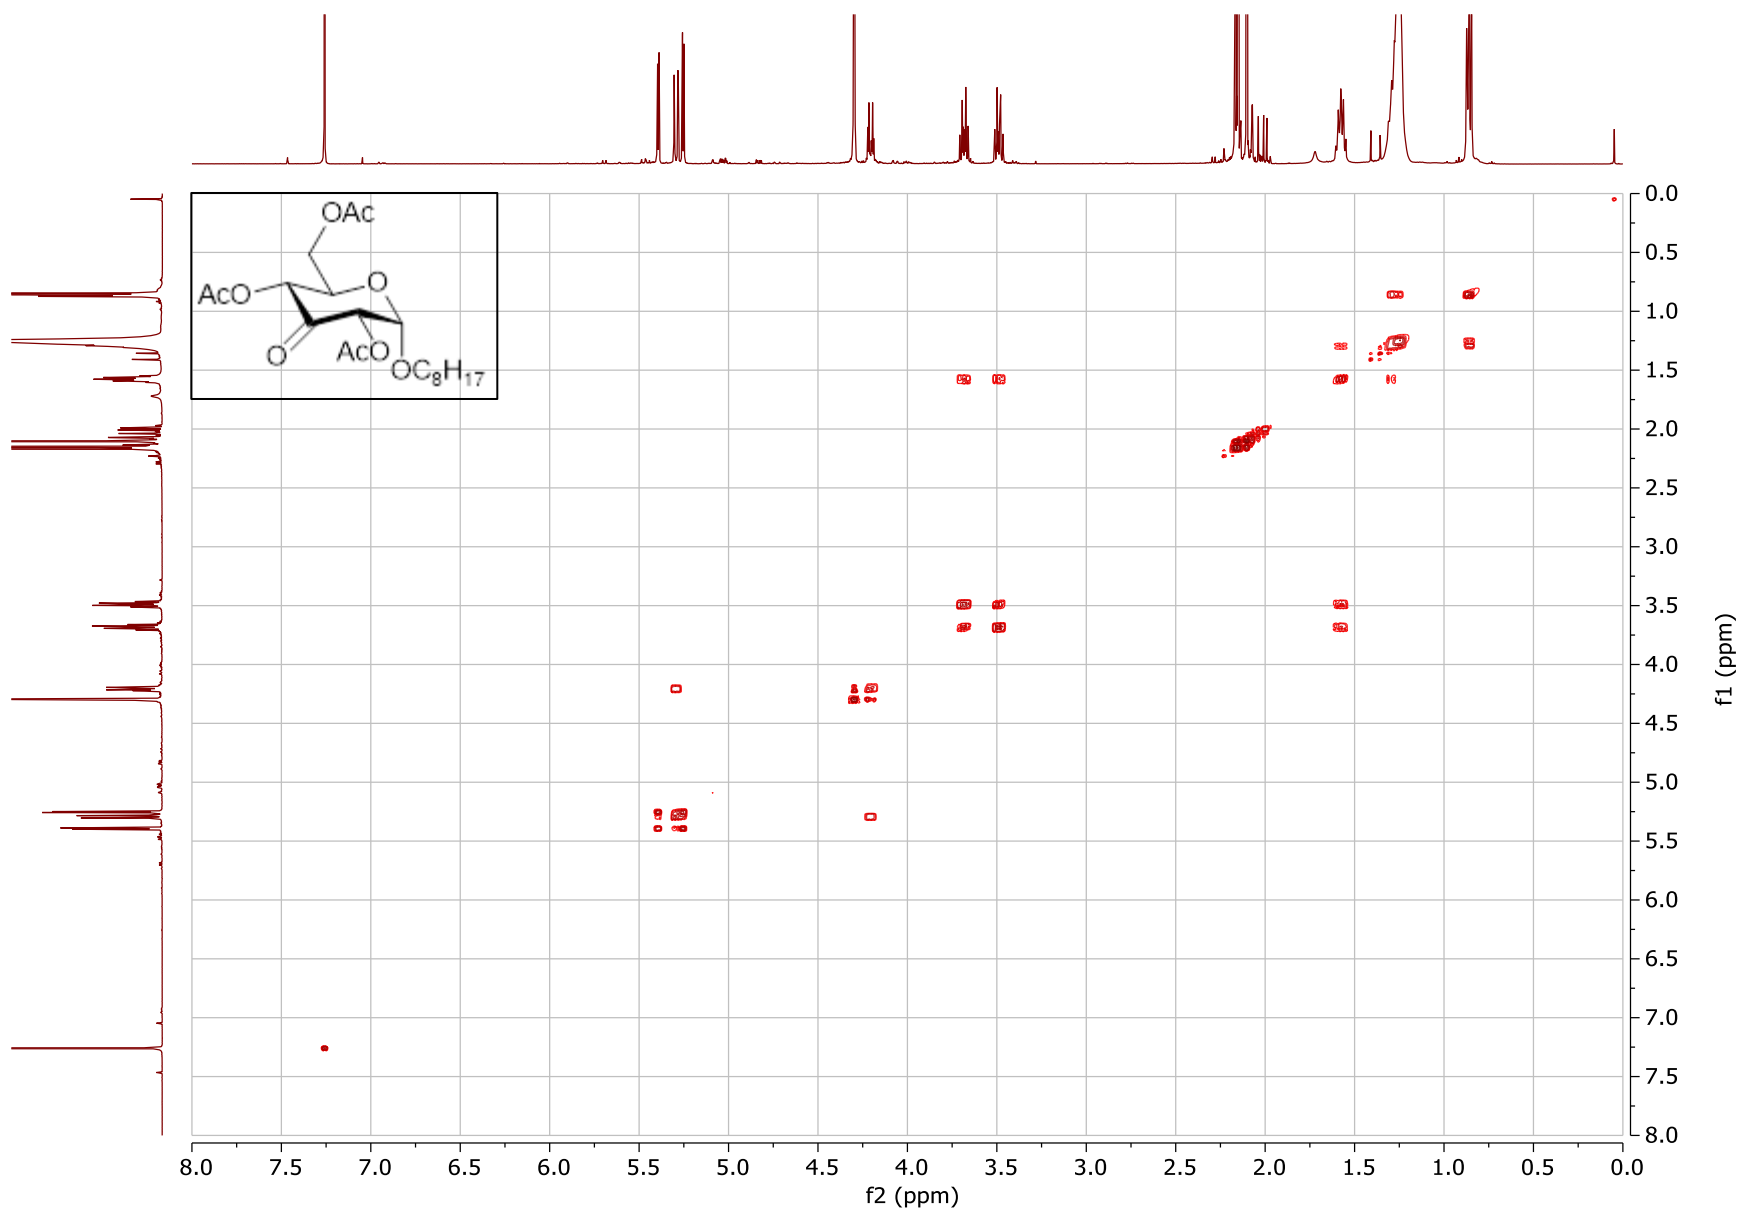

2h - HSQC (500 MHz, CDCl<sub>3</sub>)

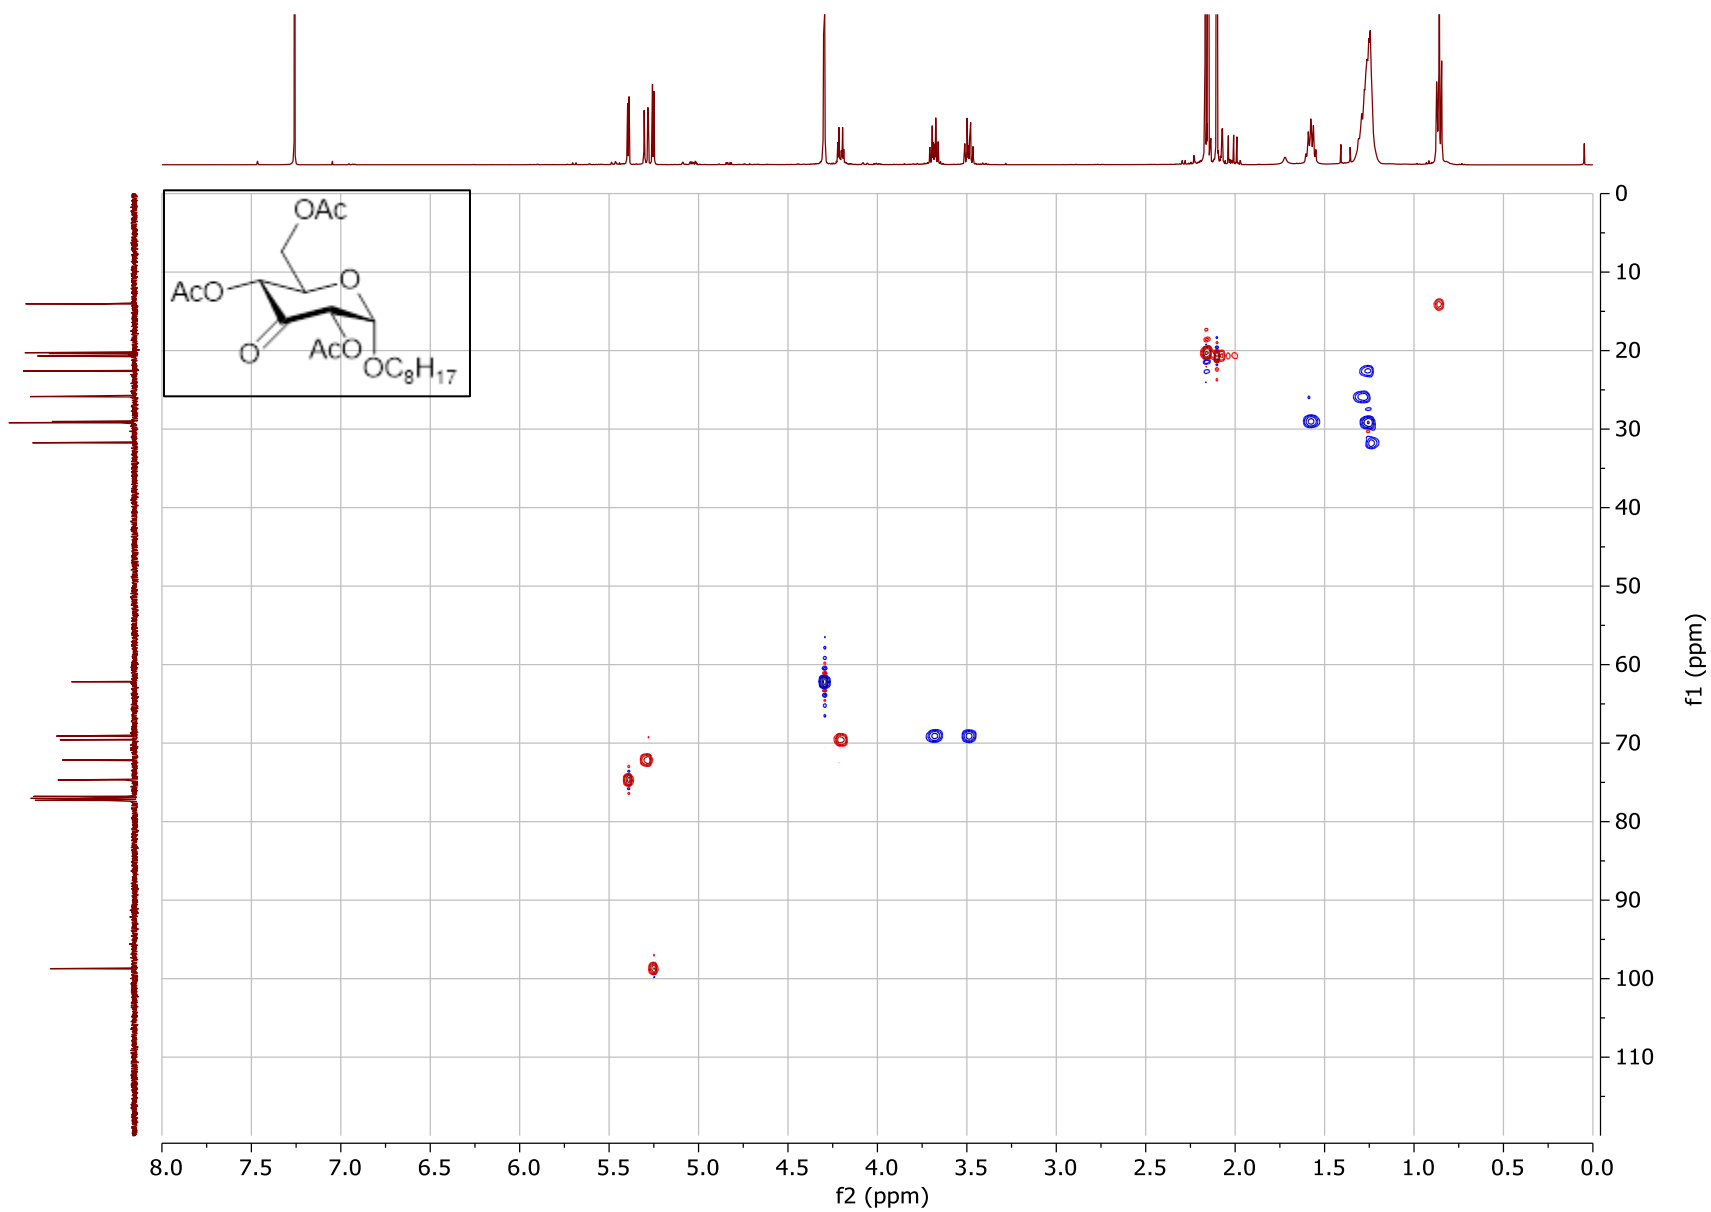



2i - <sup>1</sup>H NMR (500 MHz, CDCl<sub>3</sub>)

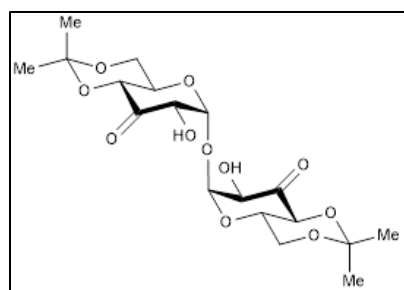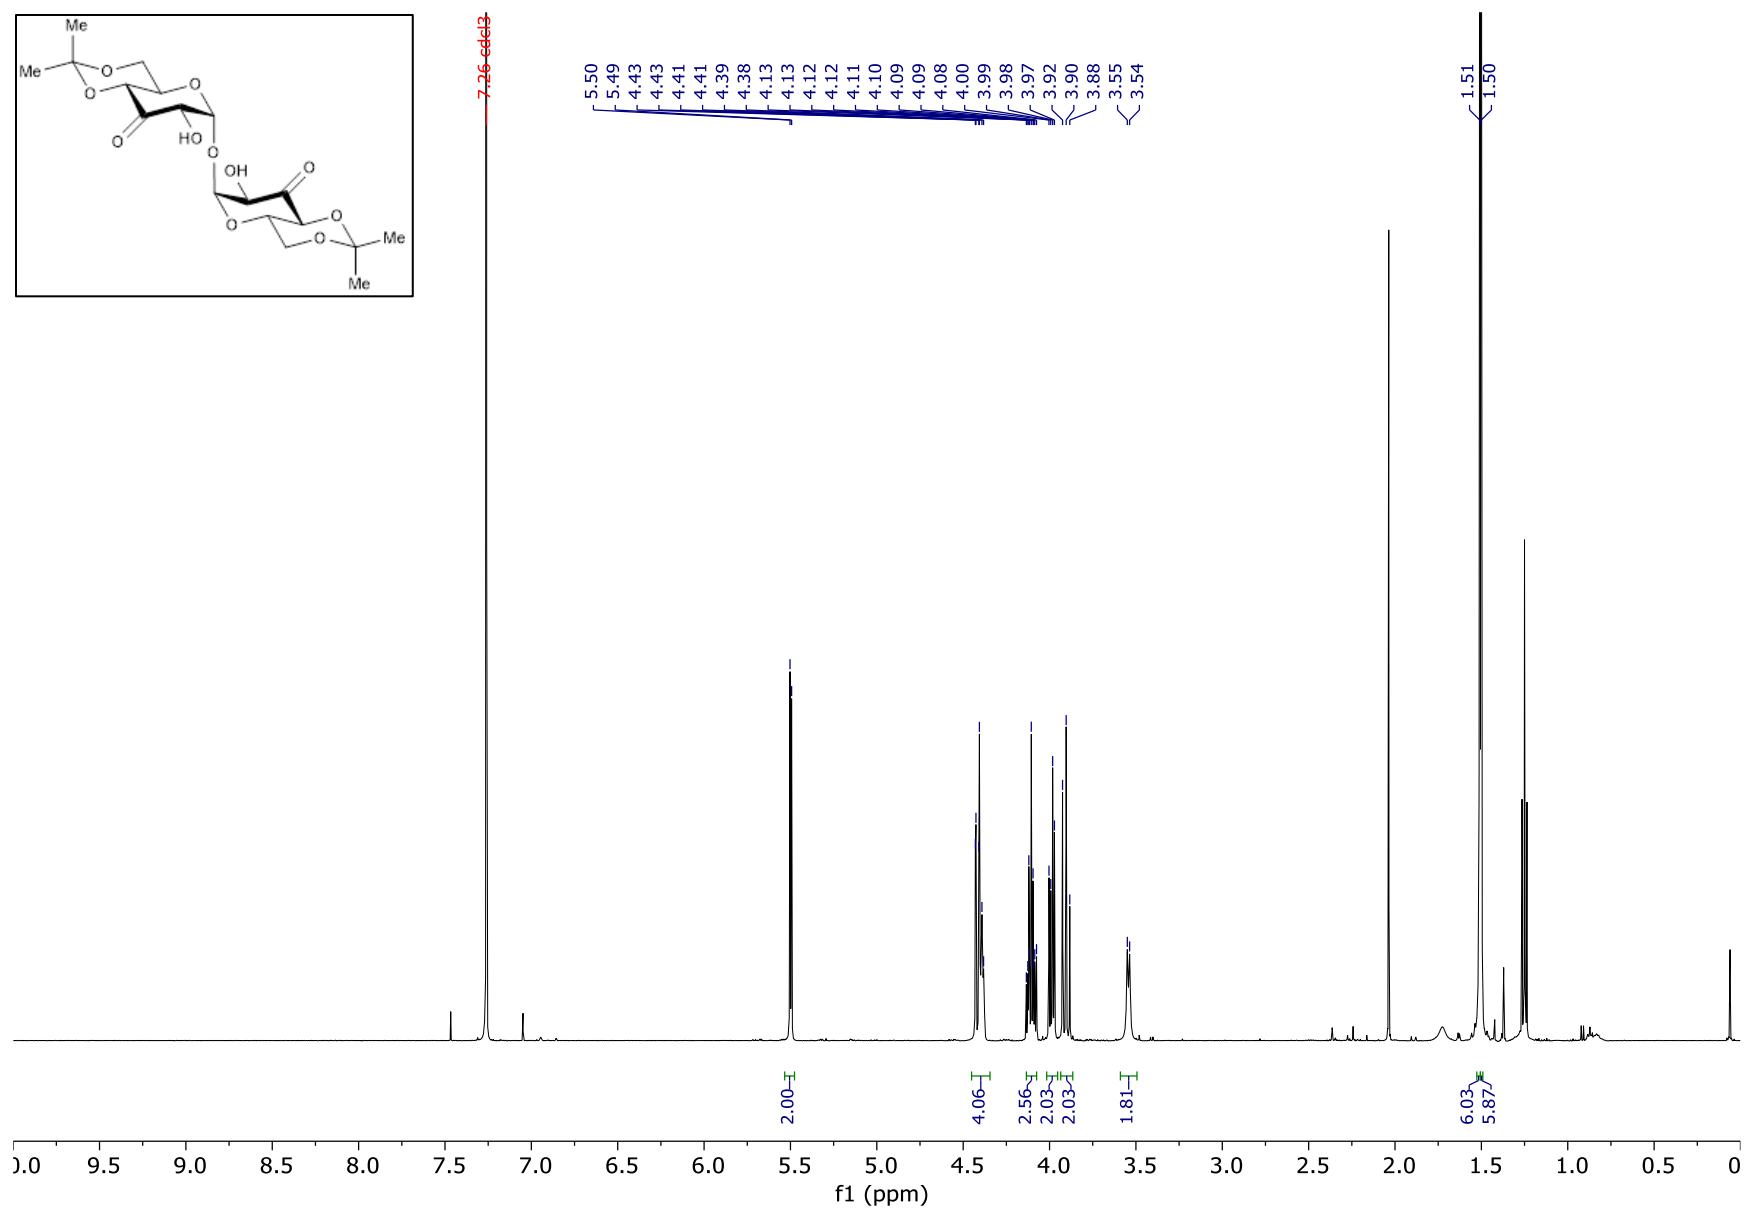

2i –  $^{13}\text{C}$  NMR (126 MHz,  $\text{CDCl}_3$ )

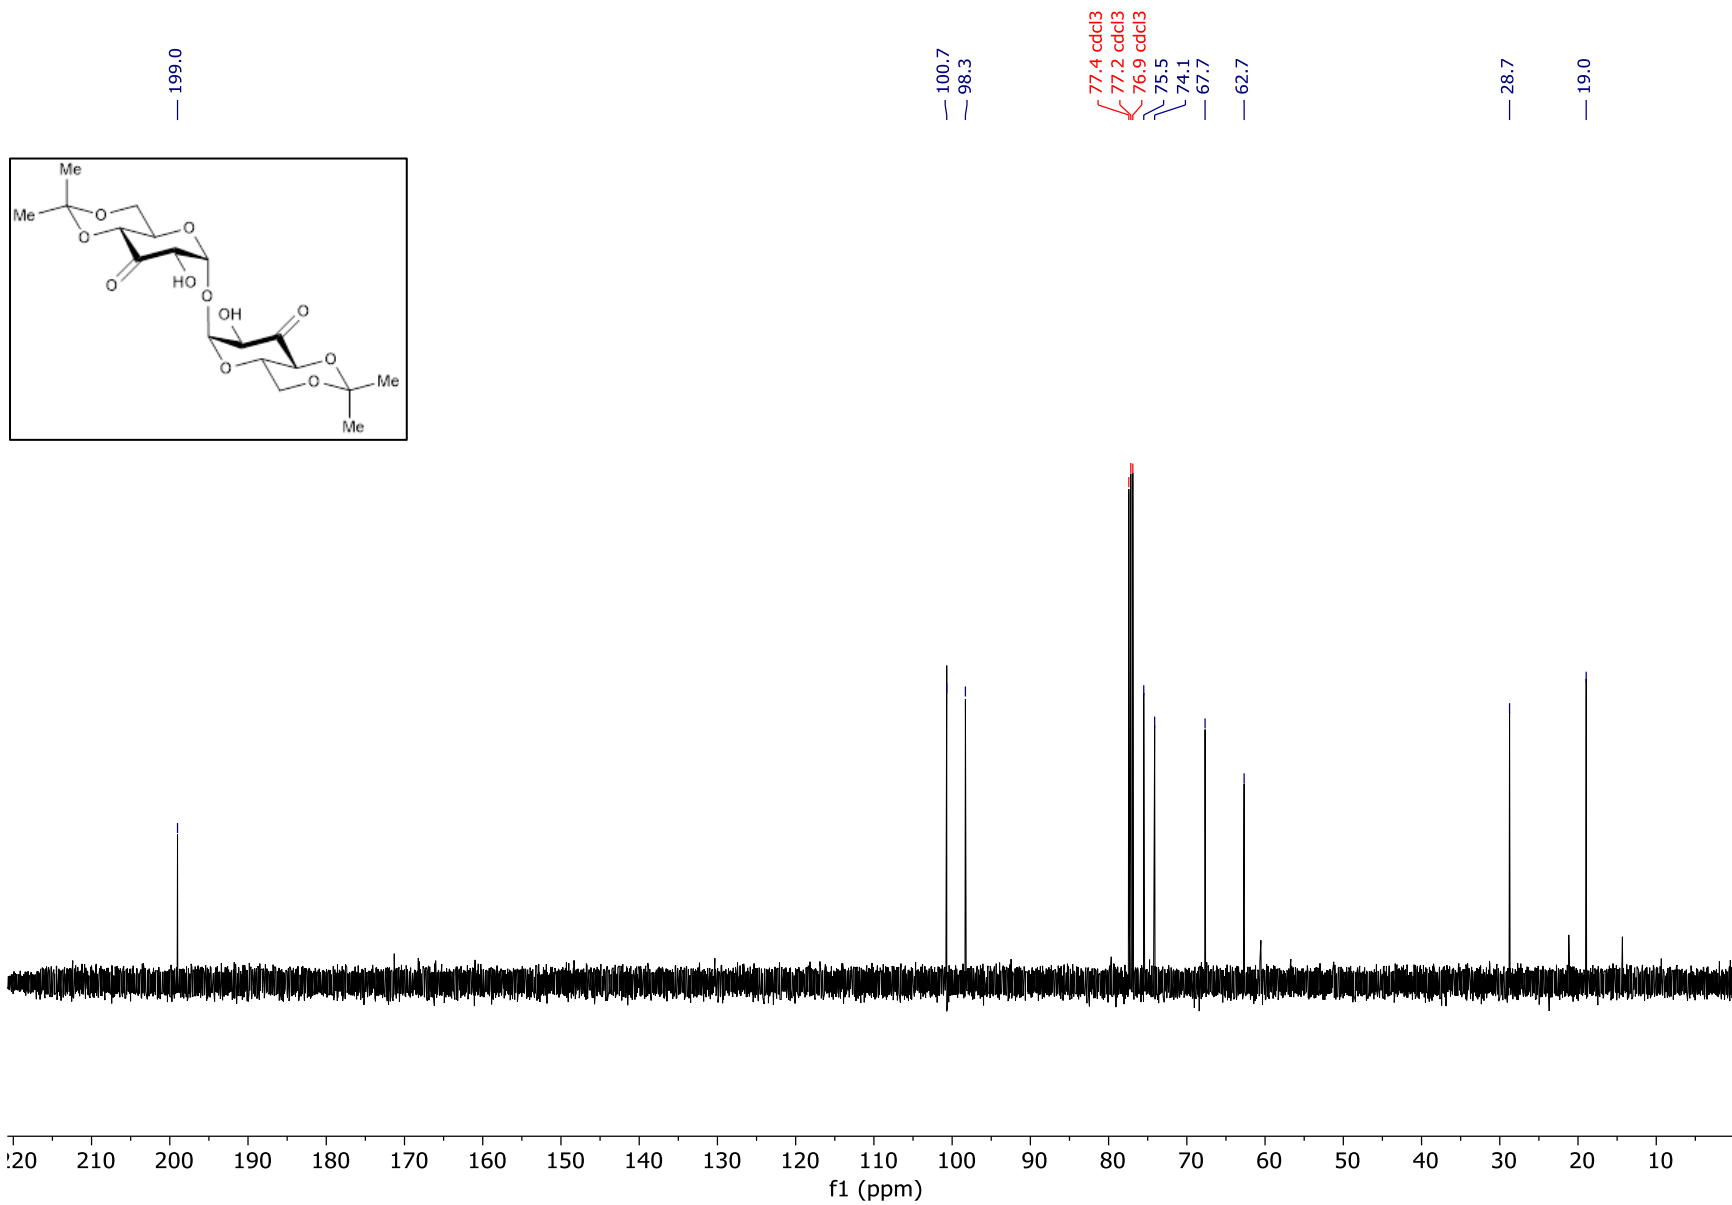

2i -COSY (500 MHz, CDCl<sub>3</sub>)

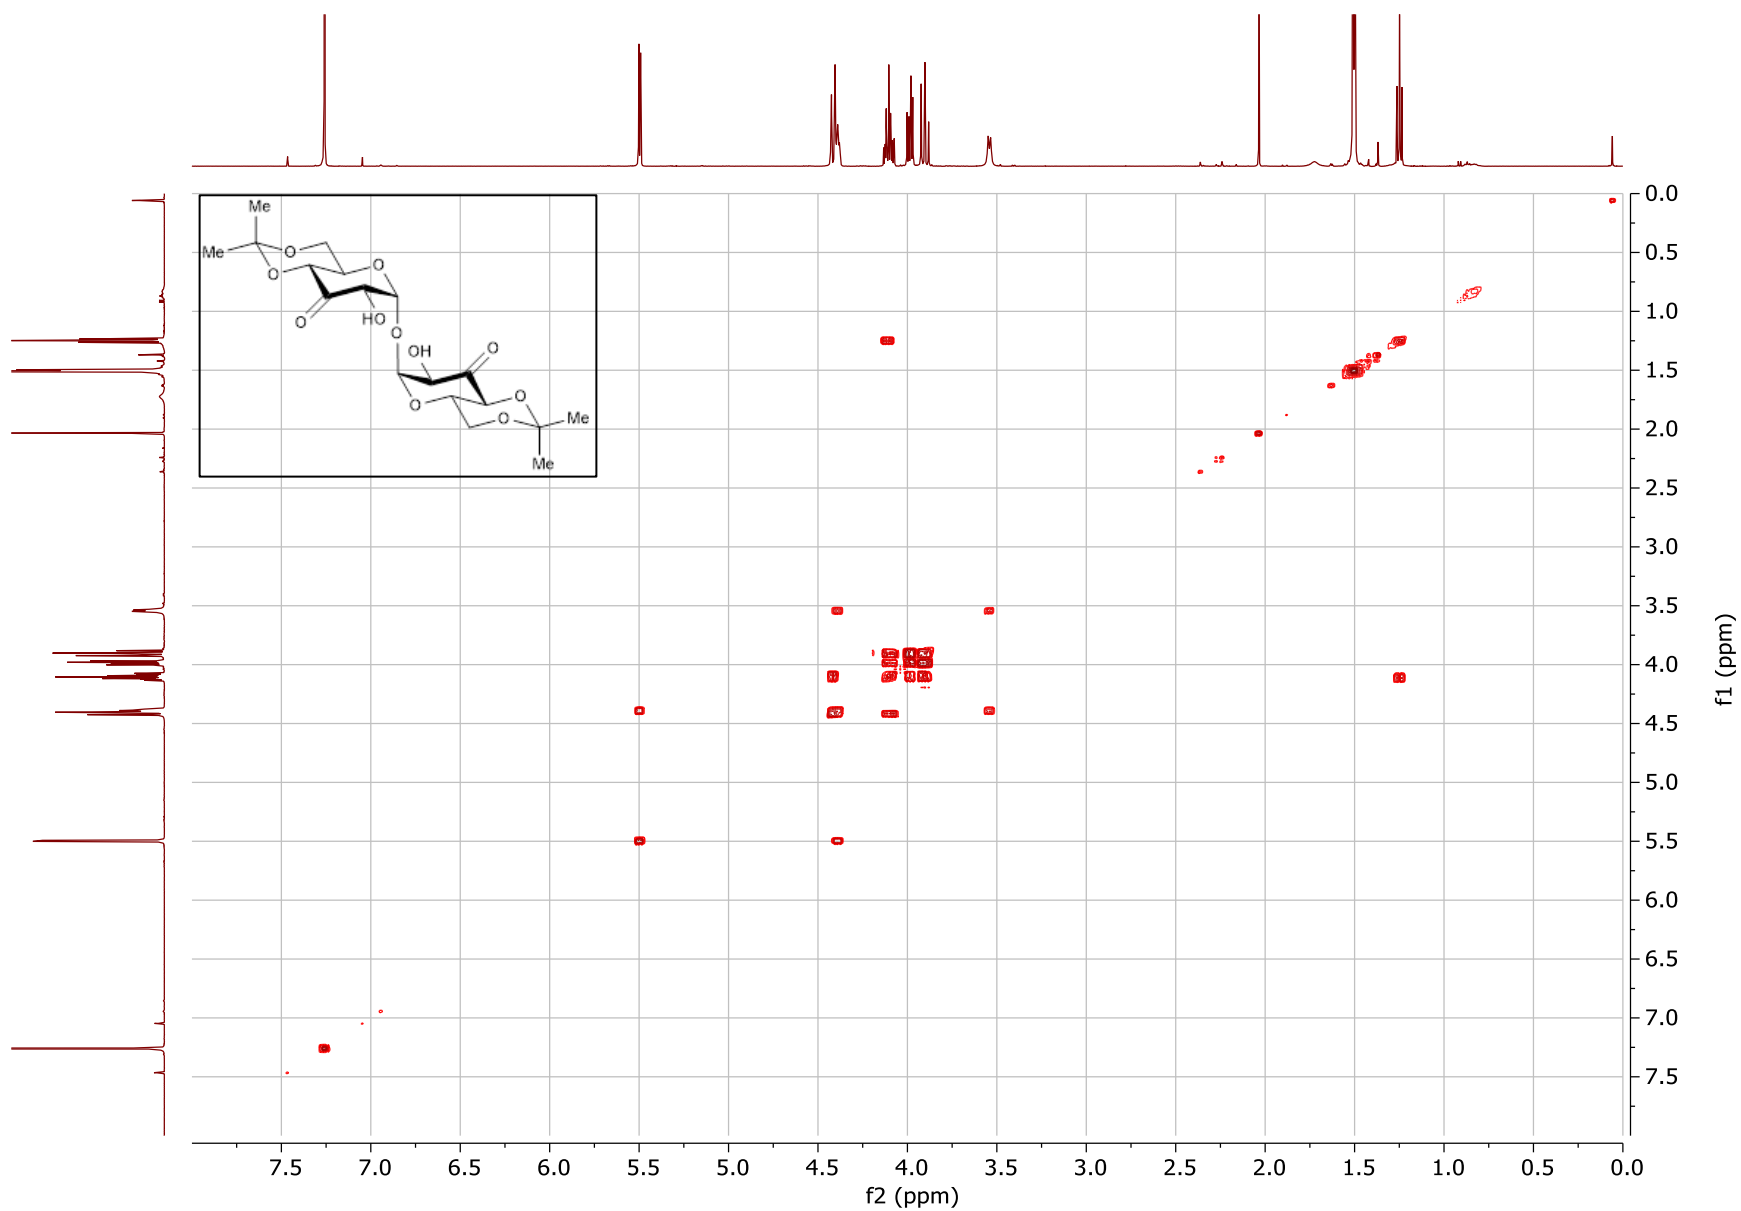

2i – HSQC (500 MHz, CDCl<sub>3</sub>)

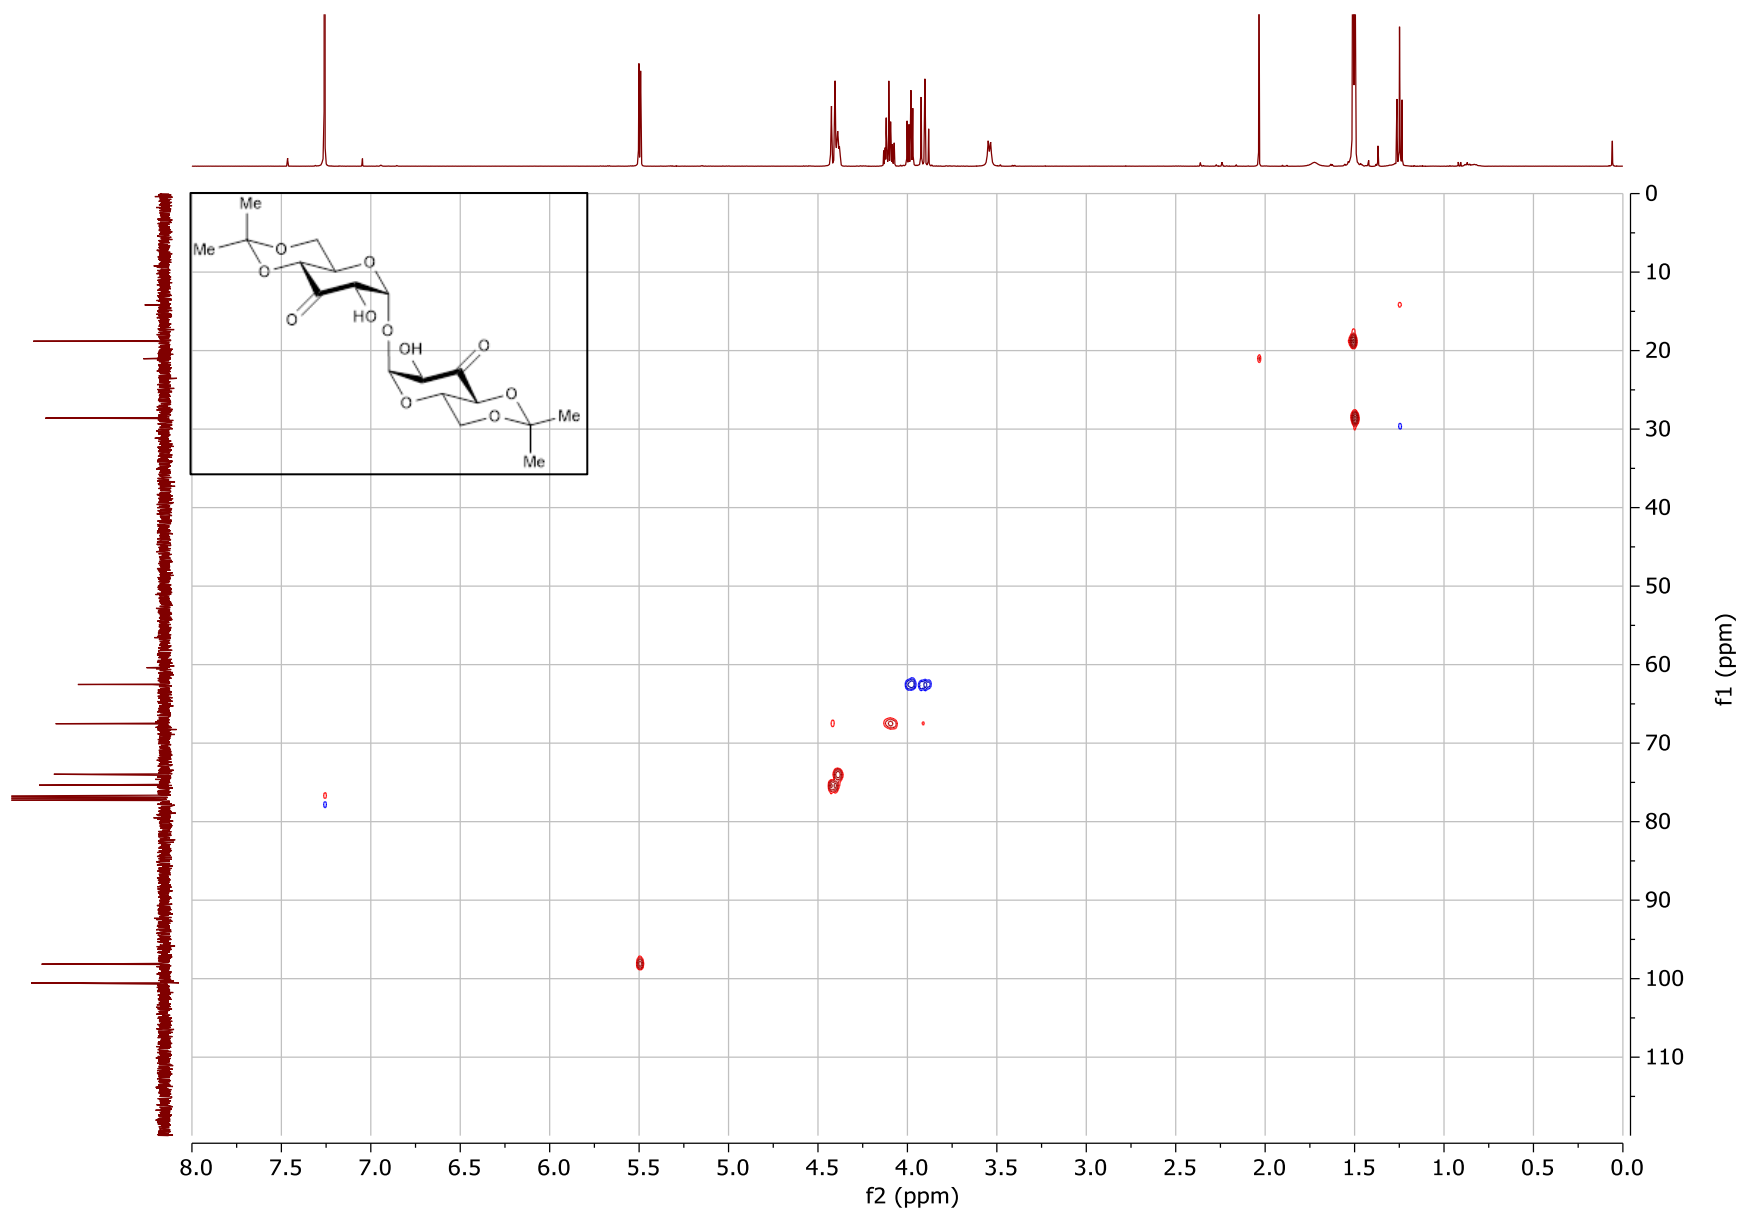

2j - <sup>1</sup>H NMR (500 MHz, CD<sub>3</sub>CN)

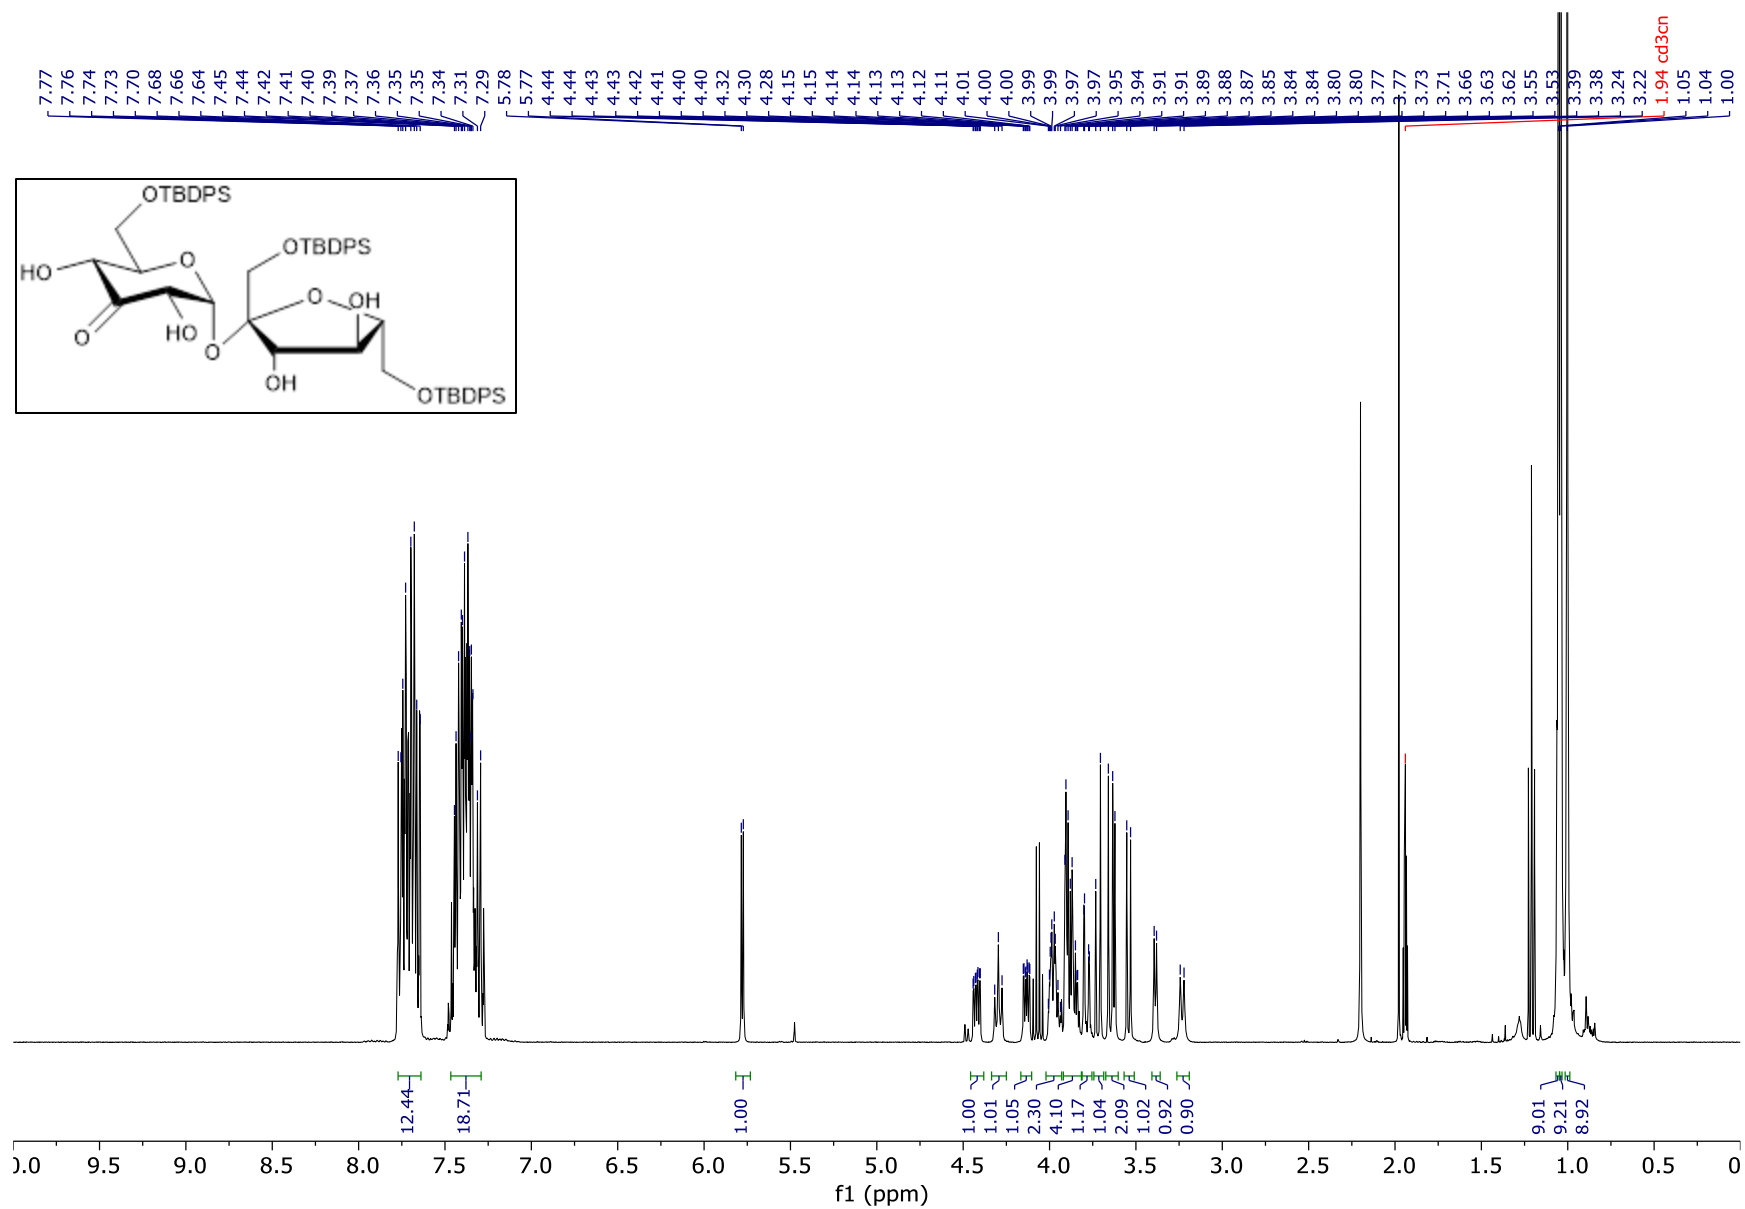

2j-<sup>13</sup>C NMR (126 MHz, CD<sub>3</sub>CN)

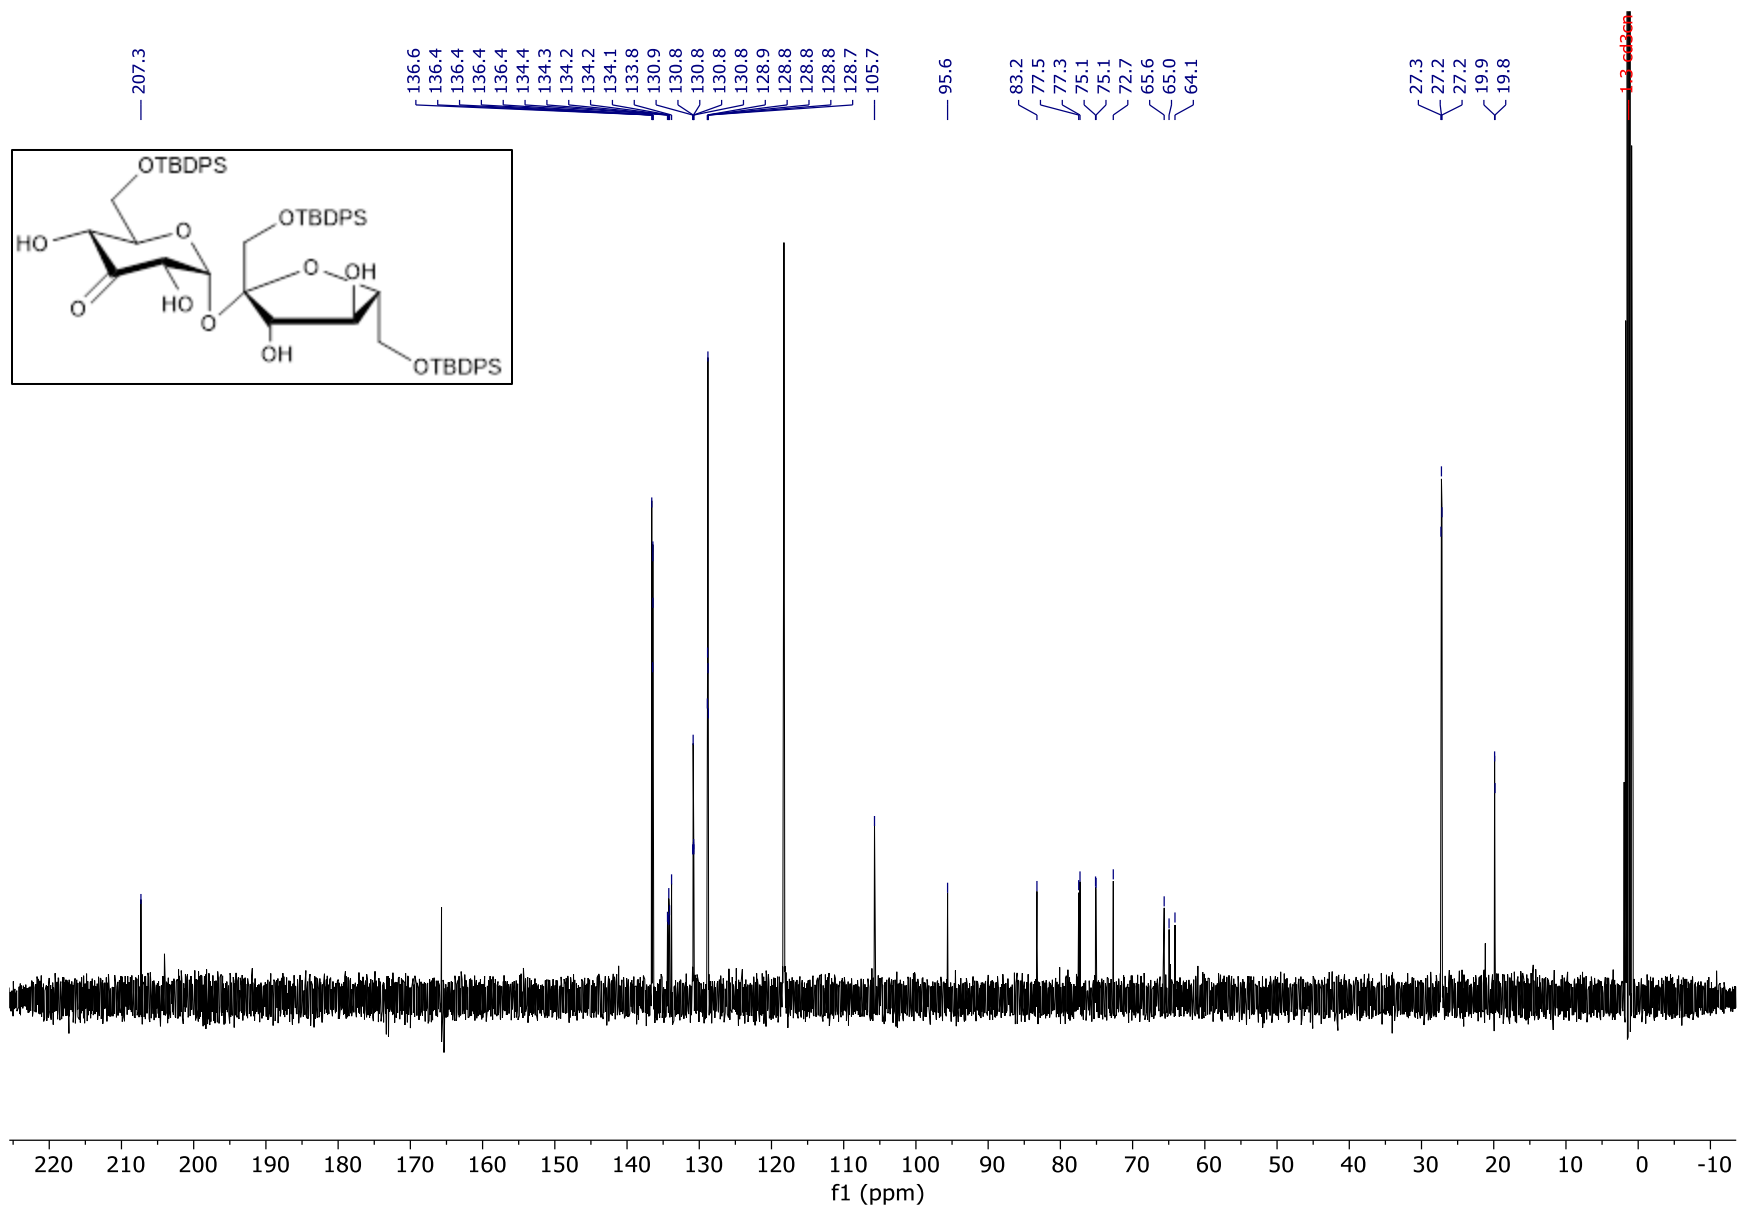

2j – COSY (500 MHz, CD<sub>3</sub>CN)

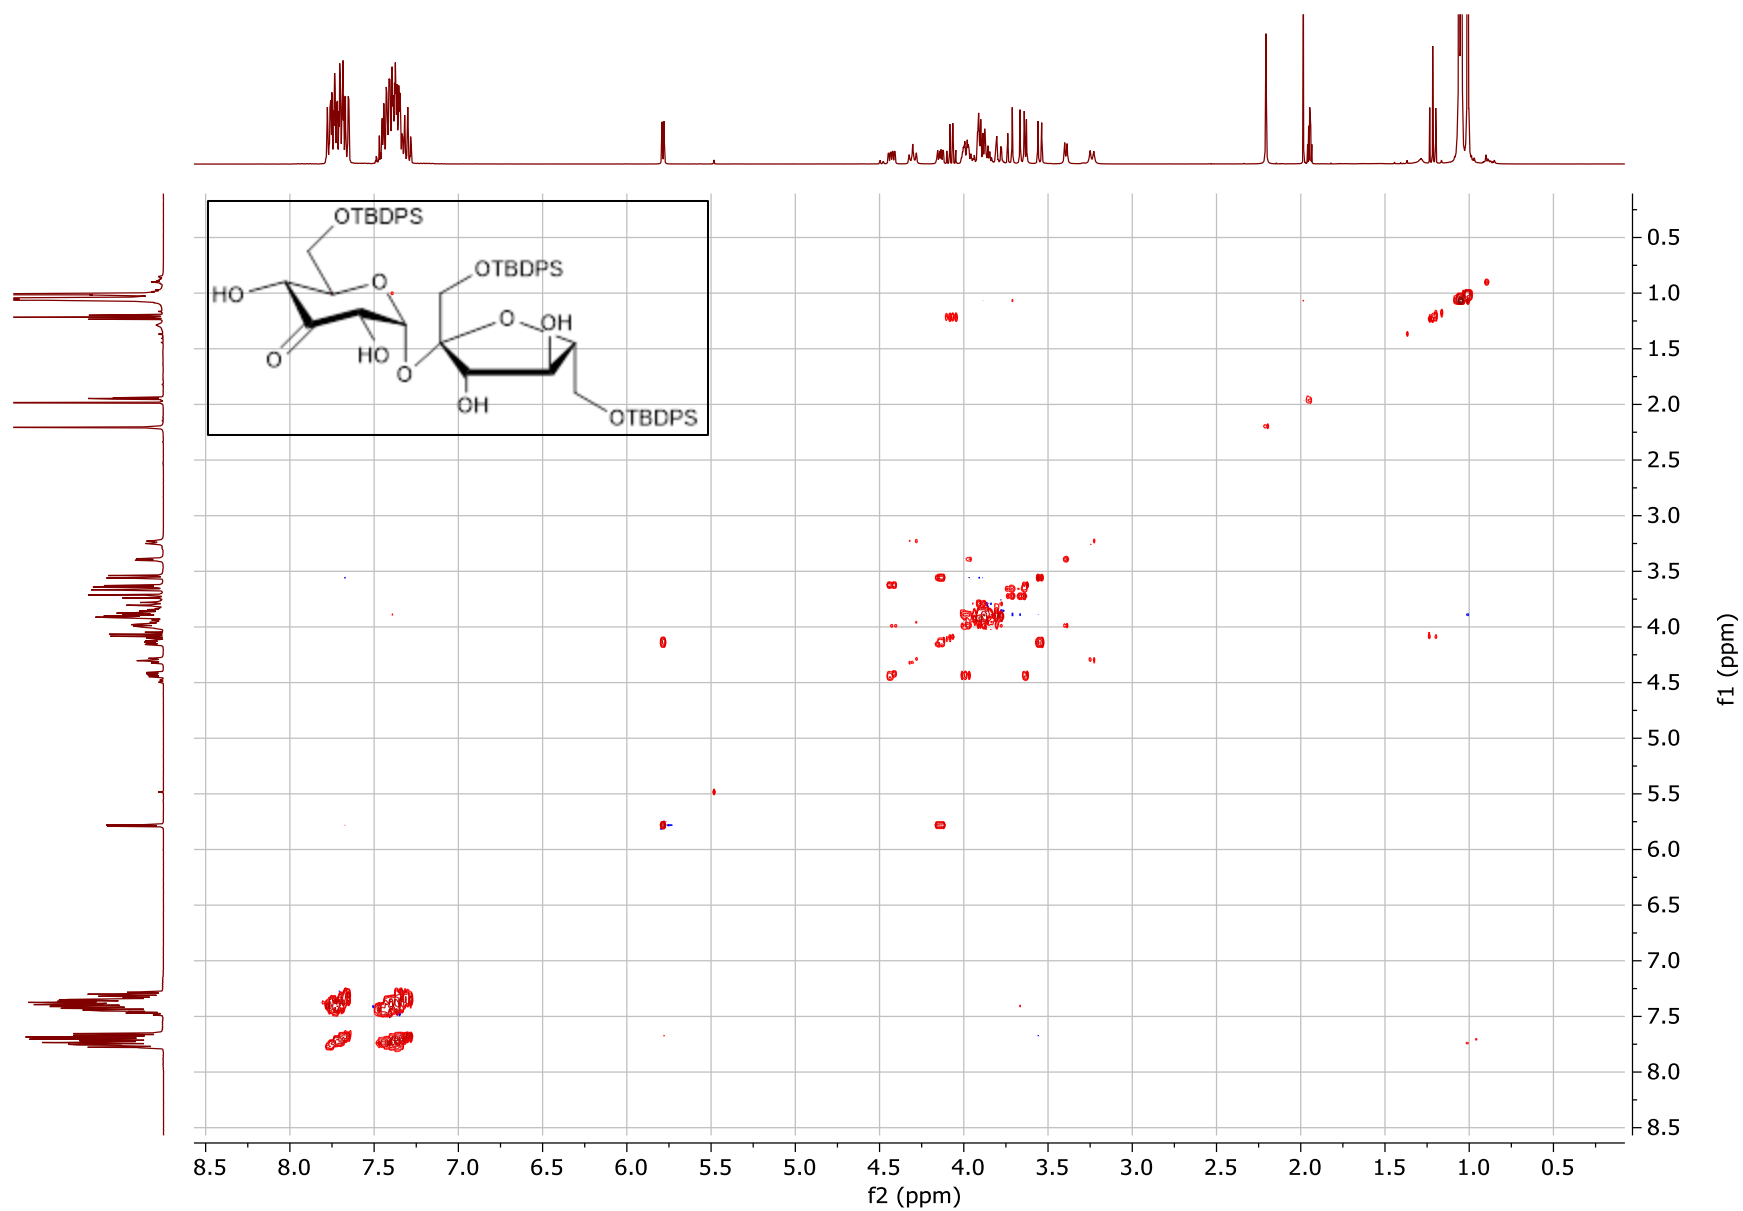

2j – HSQC (500 MHz, CD<sub>3</sub>CN)

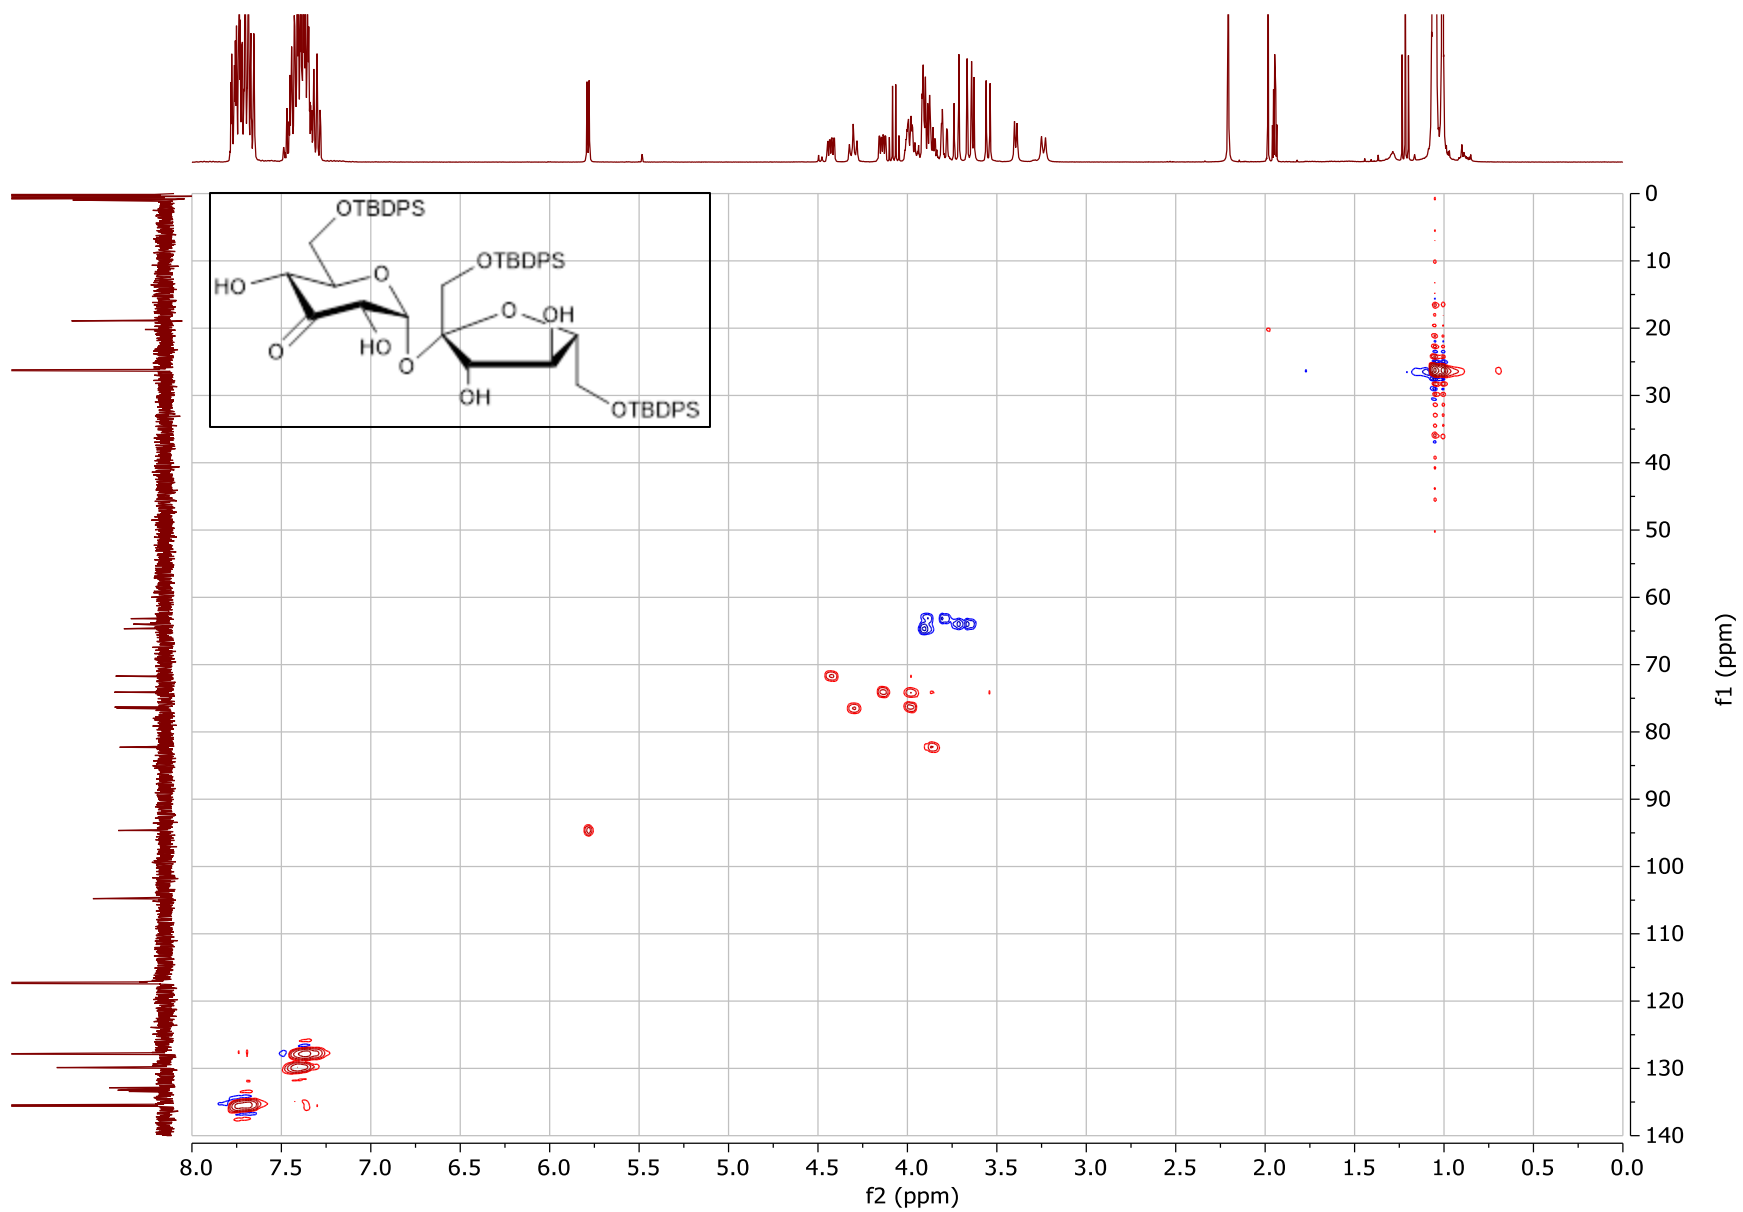



2k - <sup>1</sup>H NMR (500 MHz, CD<sub>3</sub>CN)

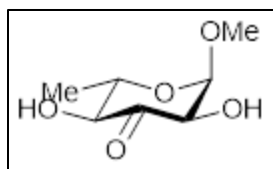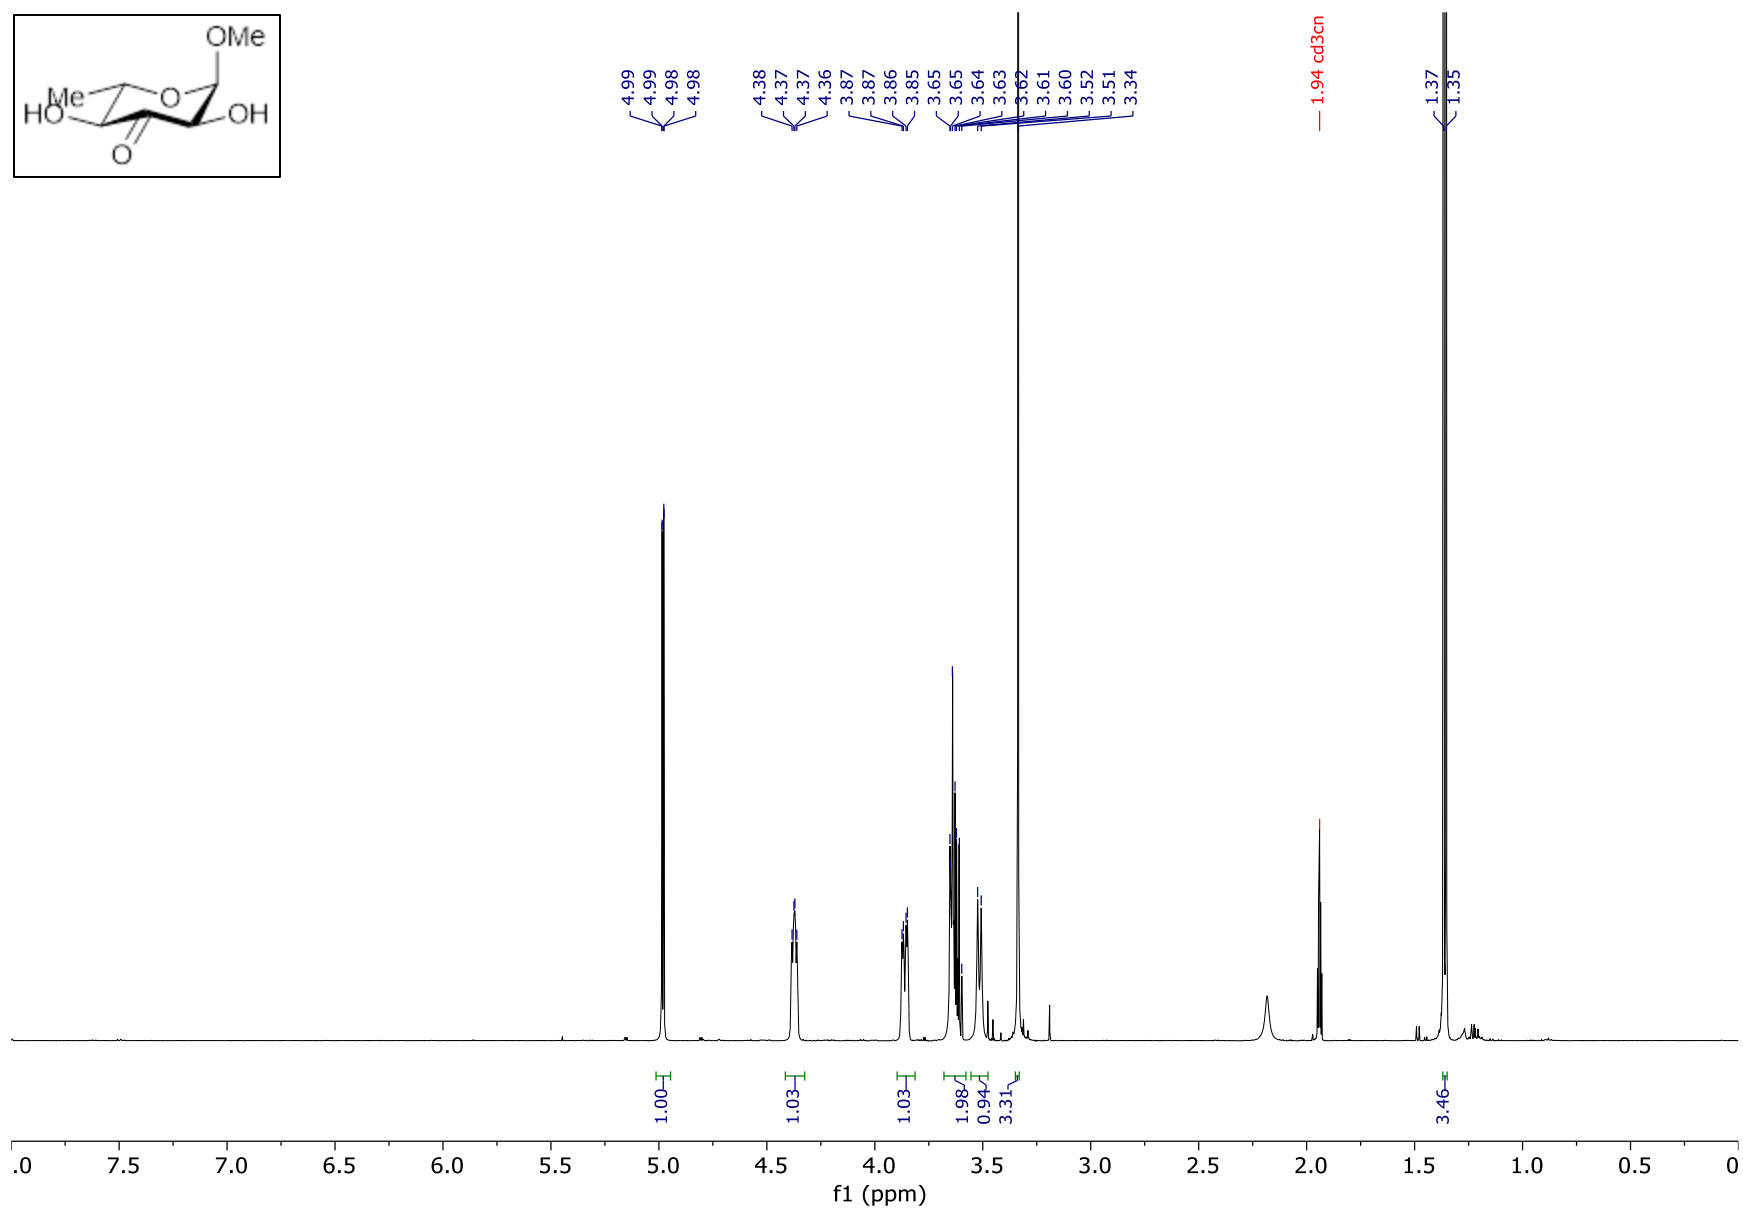

2k -  $^{13}\text{C}$  NMR (126 MHz,  $\text{CD}_3\text{CN}$ )

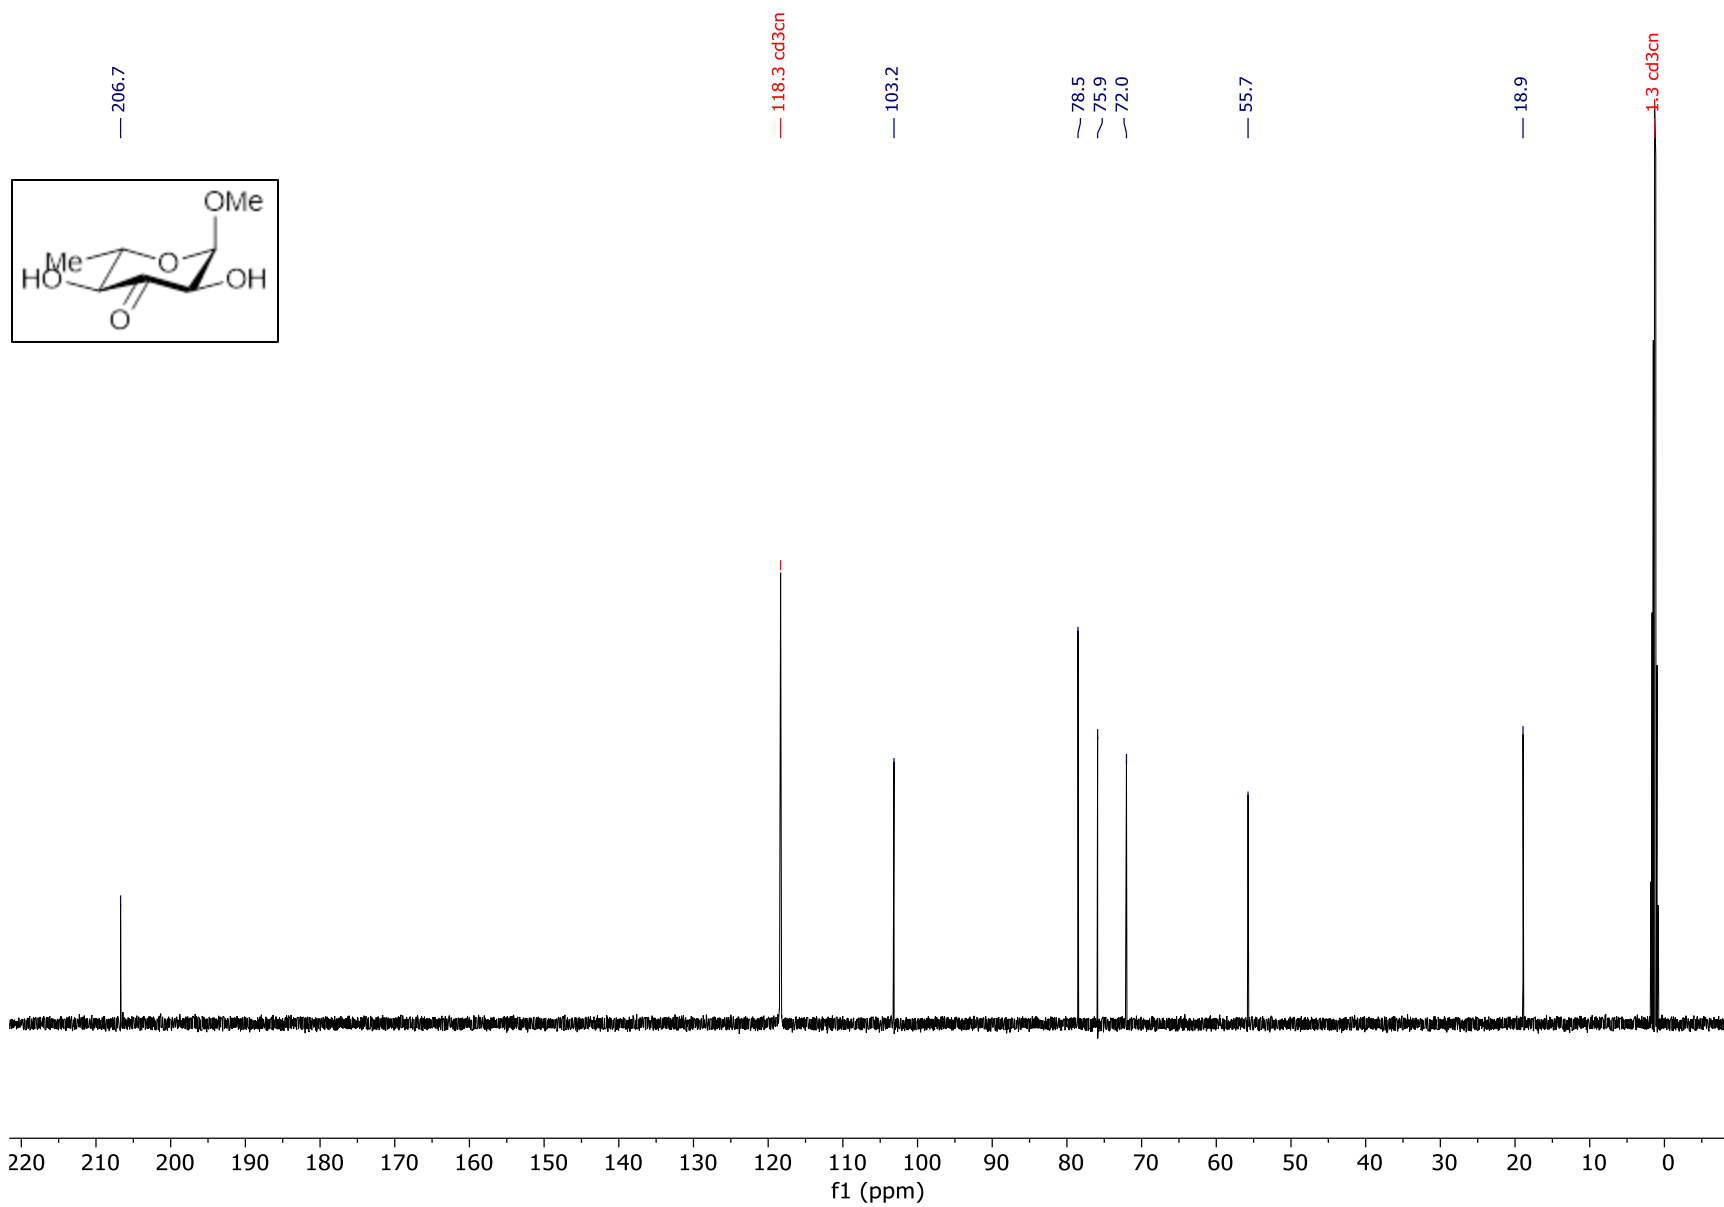

2I - <sup>1</sup>H NMR (400 MHz, CD<sub>3</sub>CN)

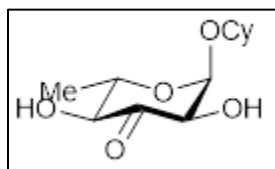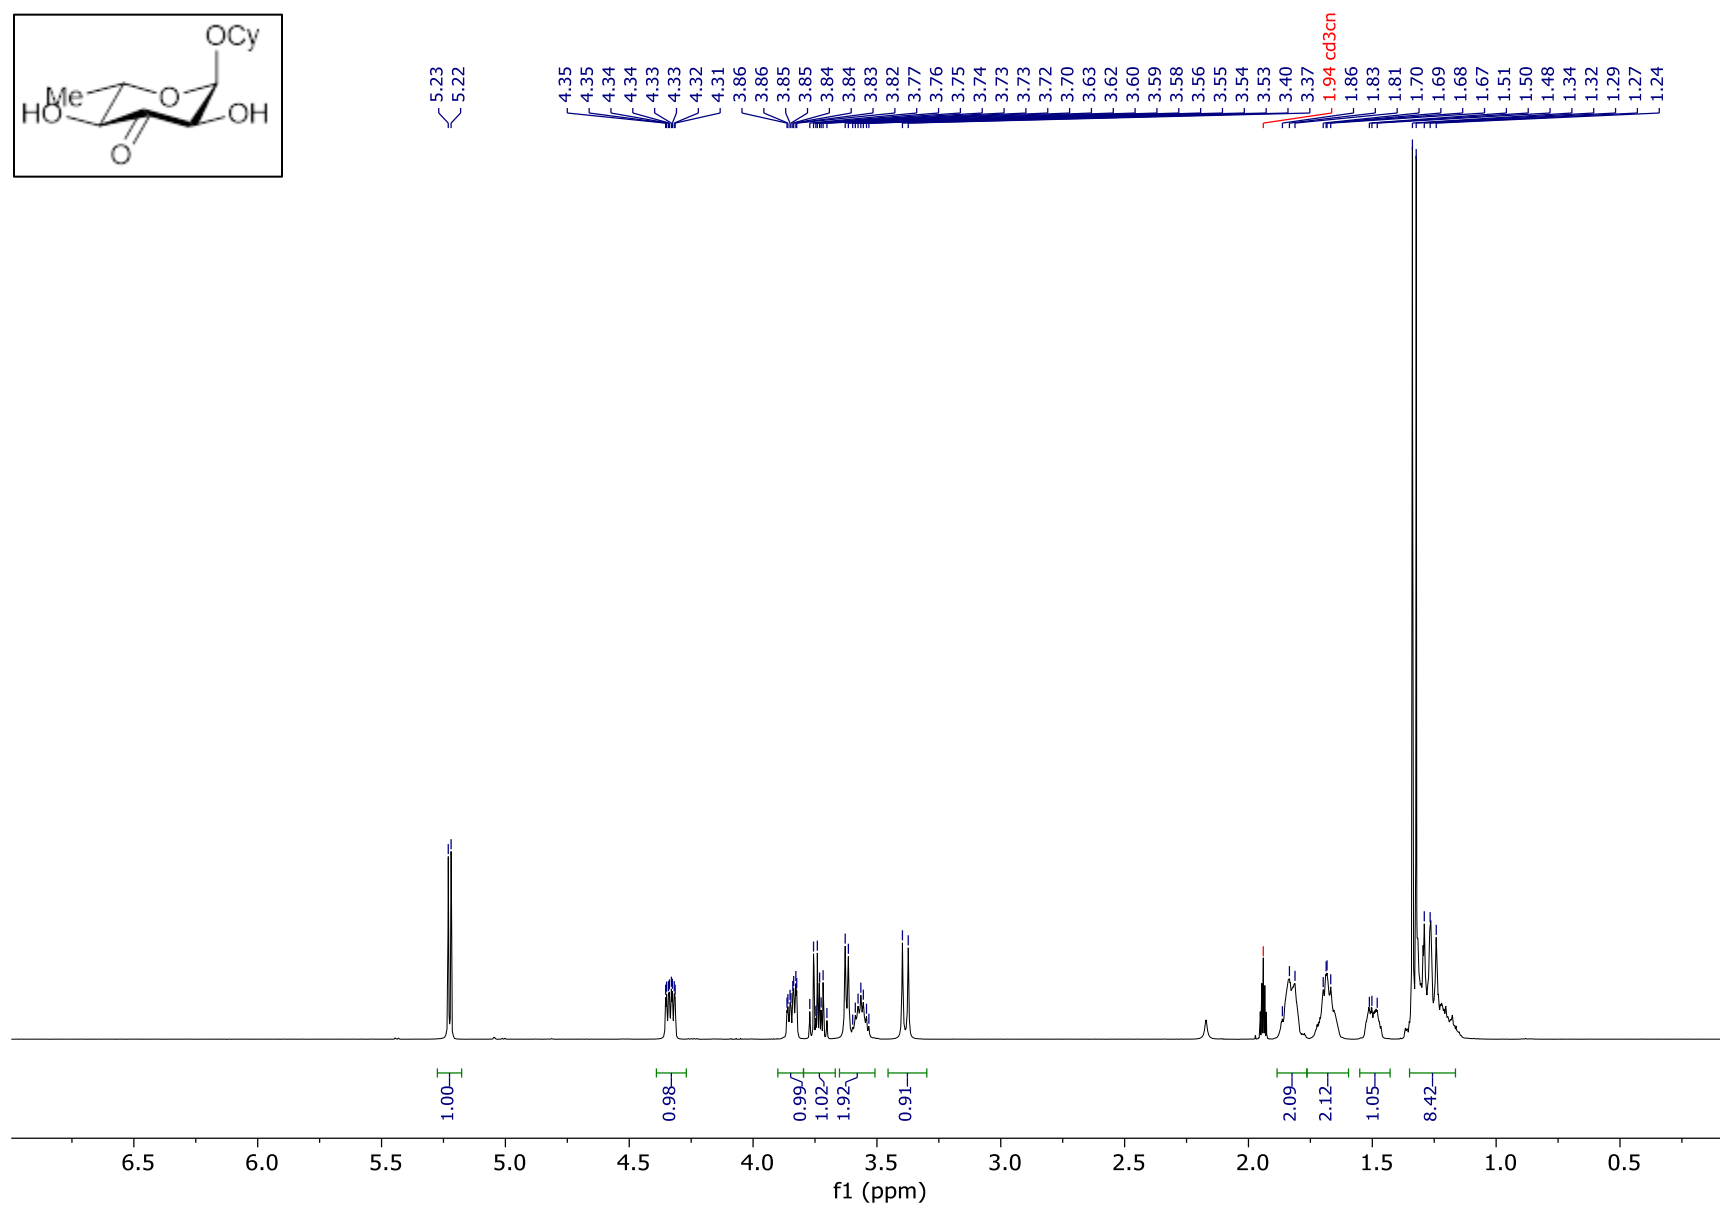

2I – <sup>13</sup>C NMR (100 MHz, CD<sub>3</sub>CN)

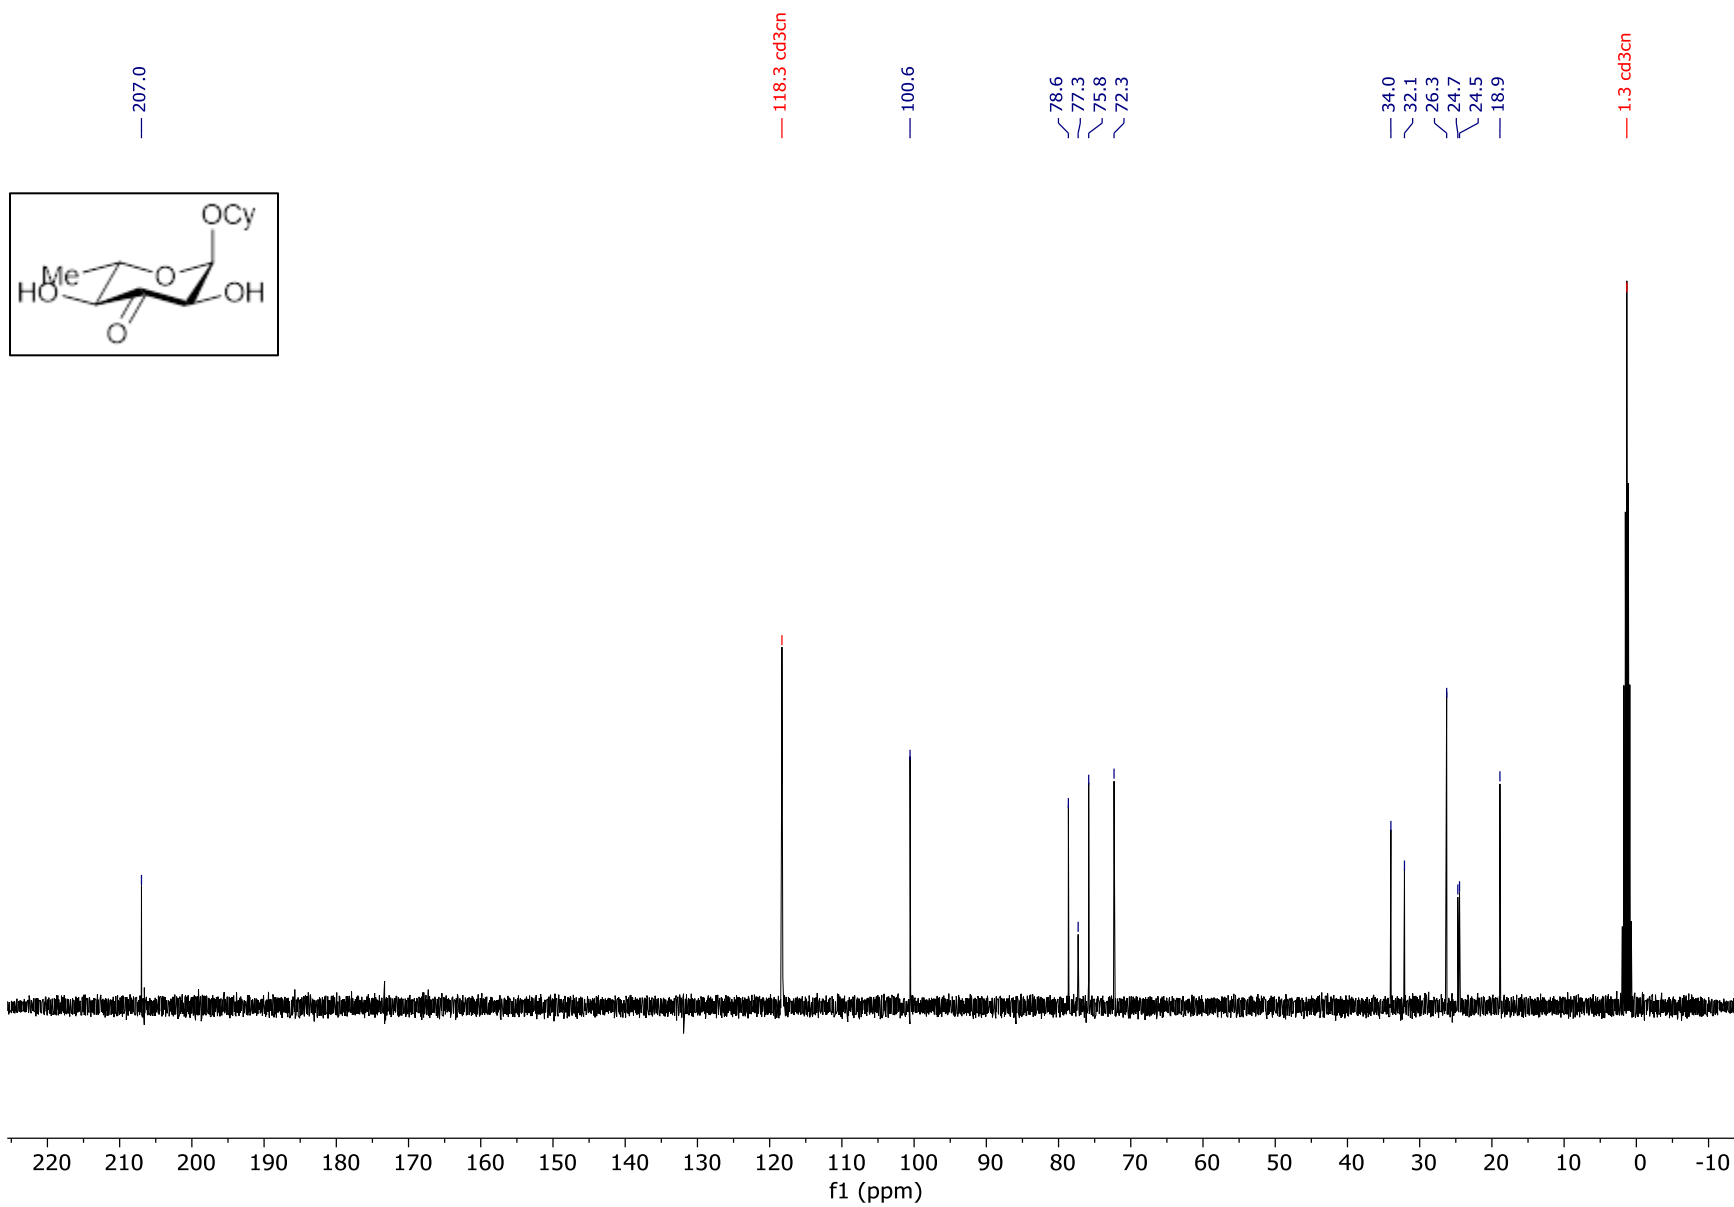

2I – COSY (400 MHz, CD<sub>3</sub>CN)

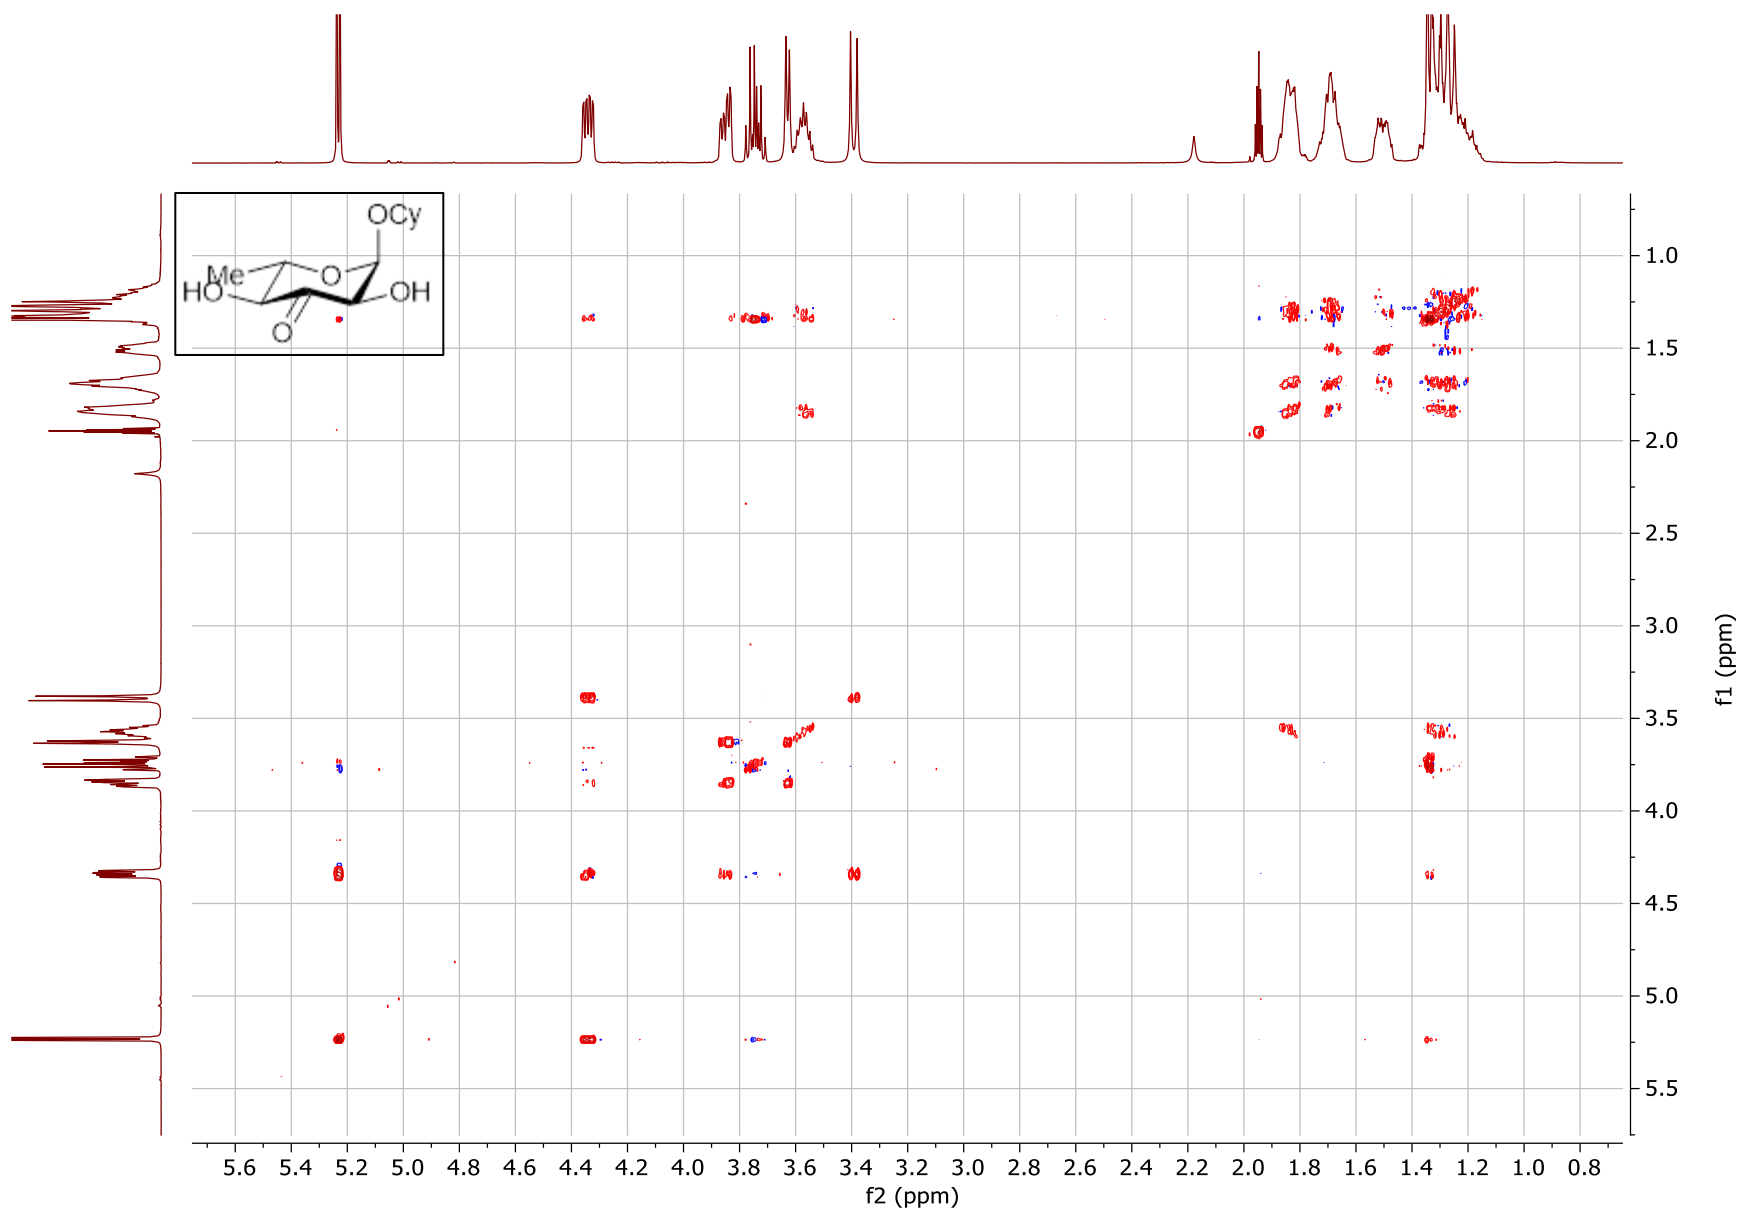

2I – HSQC (400 MHz, CD<sub>3</sub>CN)

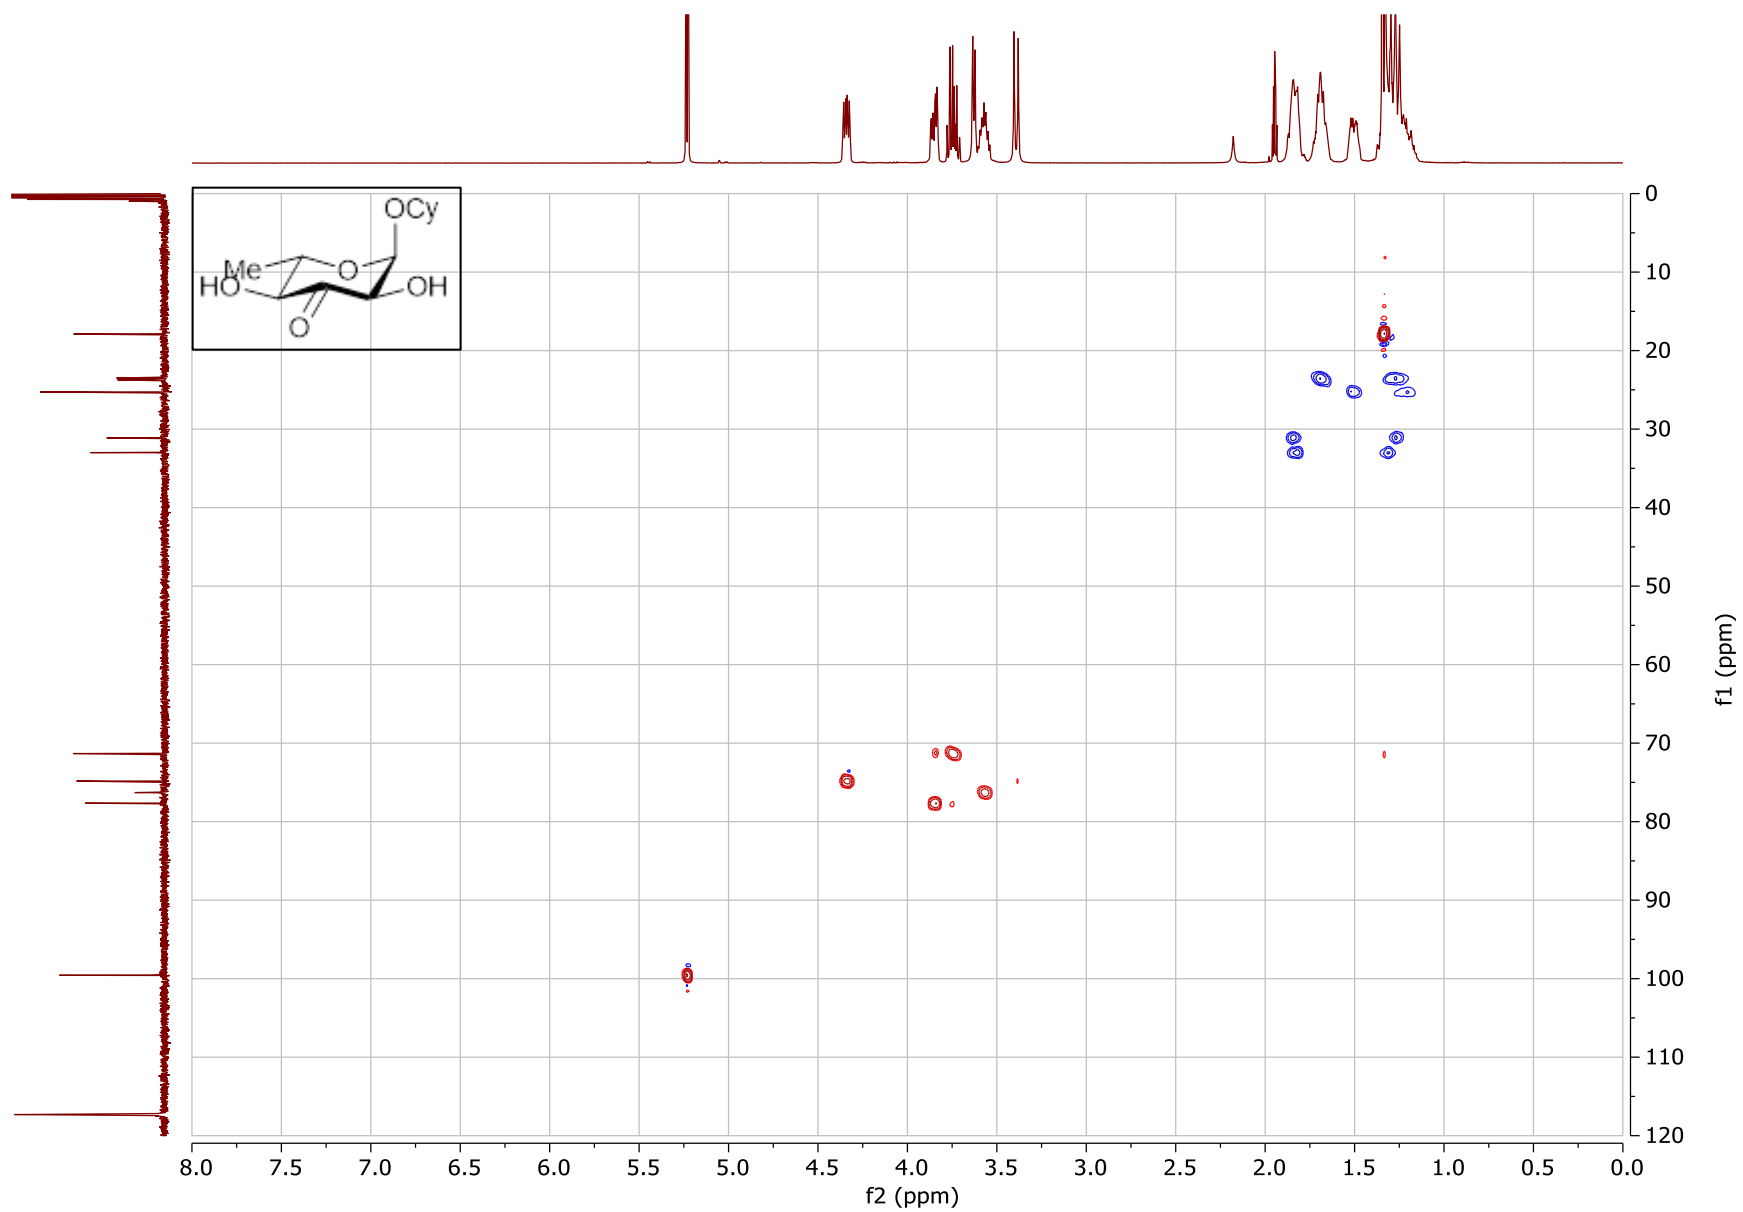

2m -  $^1\text{H}$  NMR (500 MHz,  $\text{CD}_3\text{CN}$ )

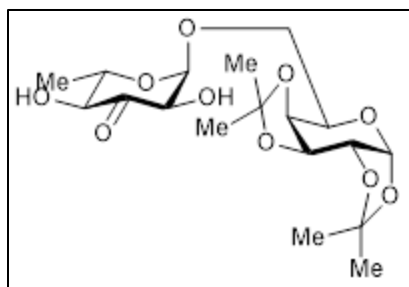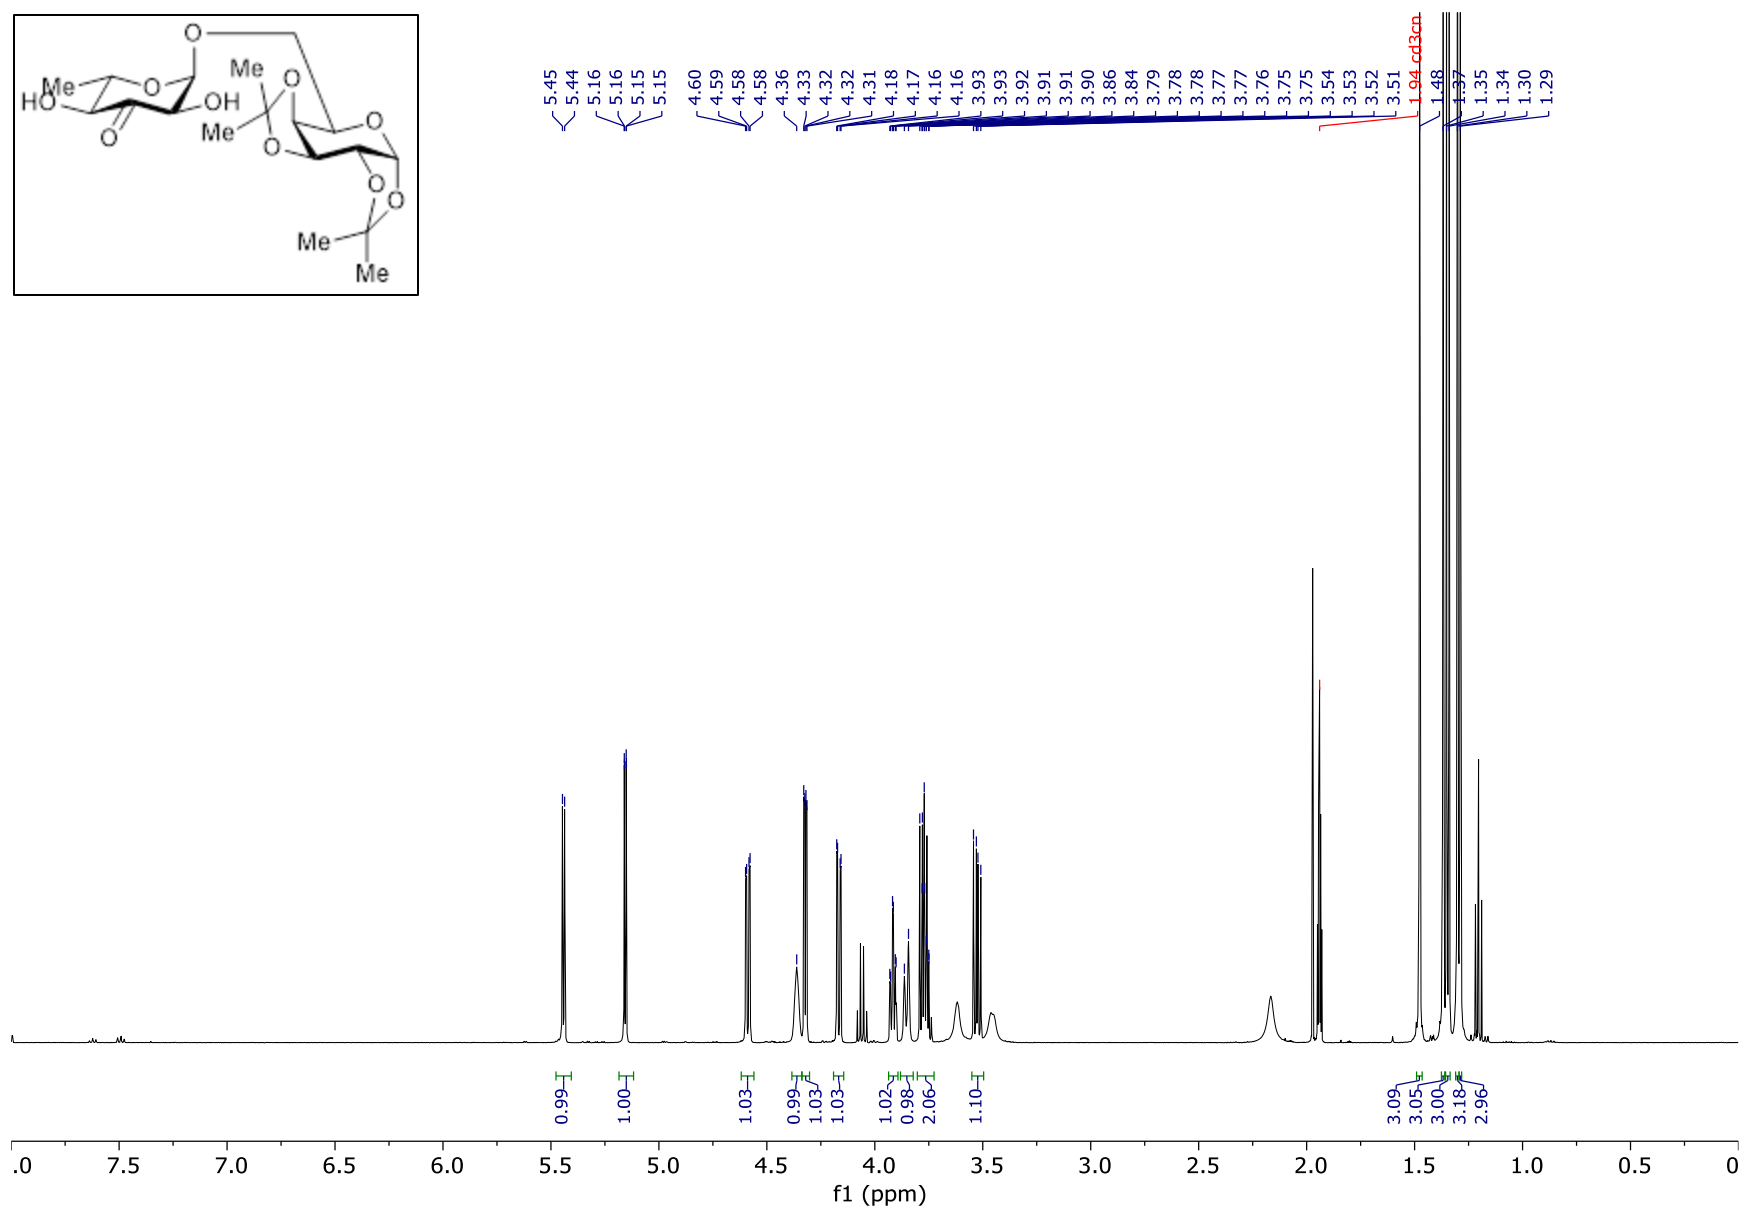

2m - <sup>13</sup>C NMR (126 MHz, CD<sub>3</sub>CN)

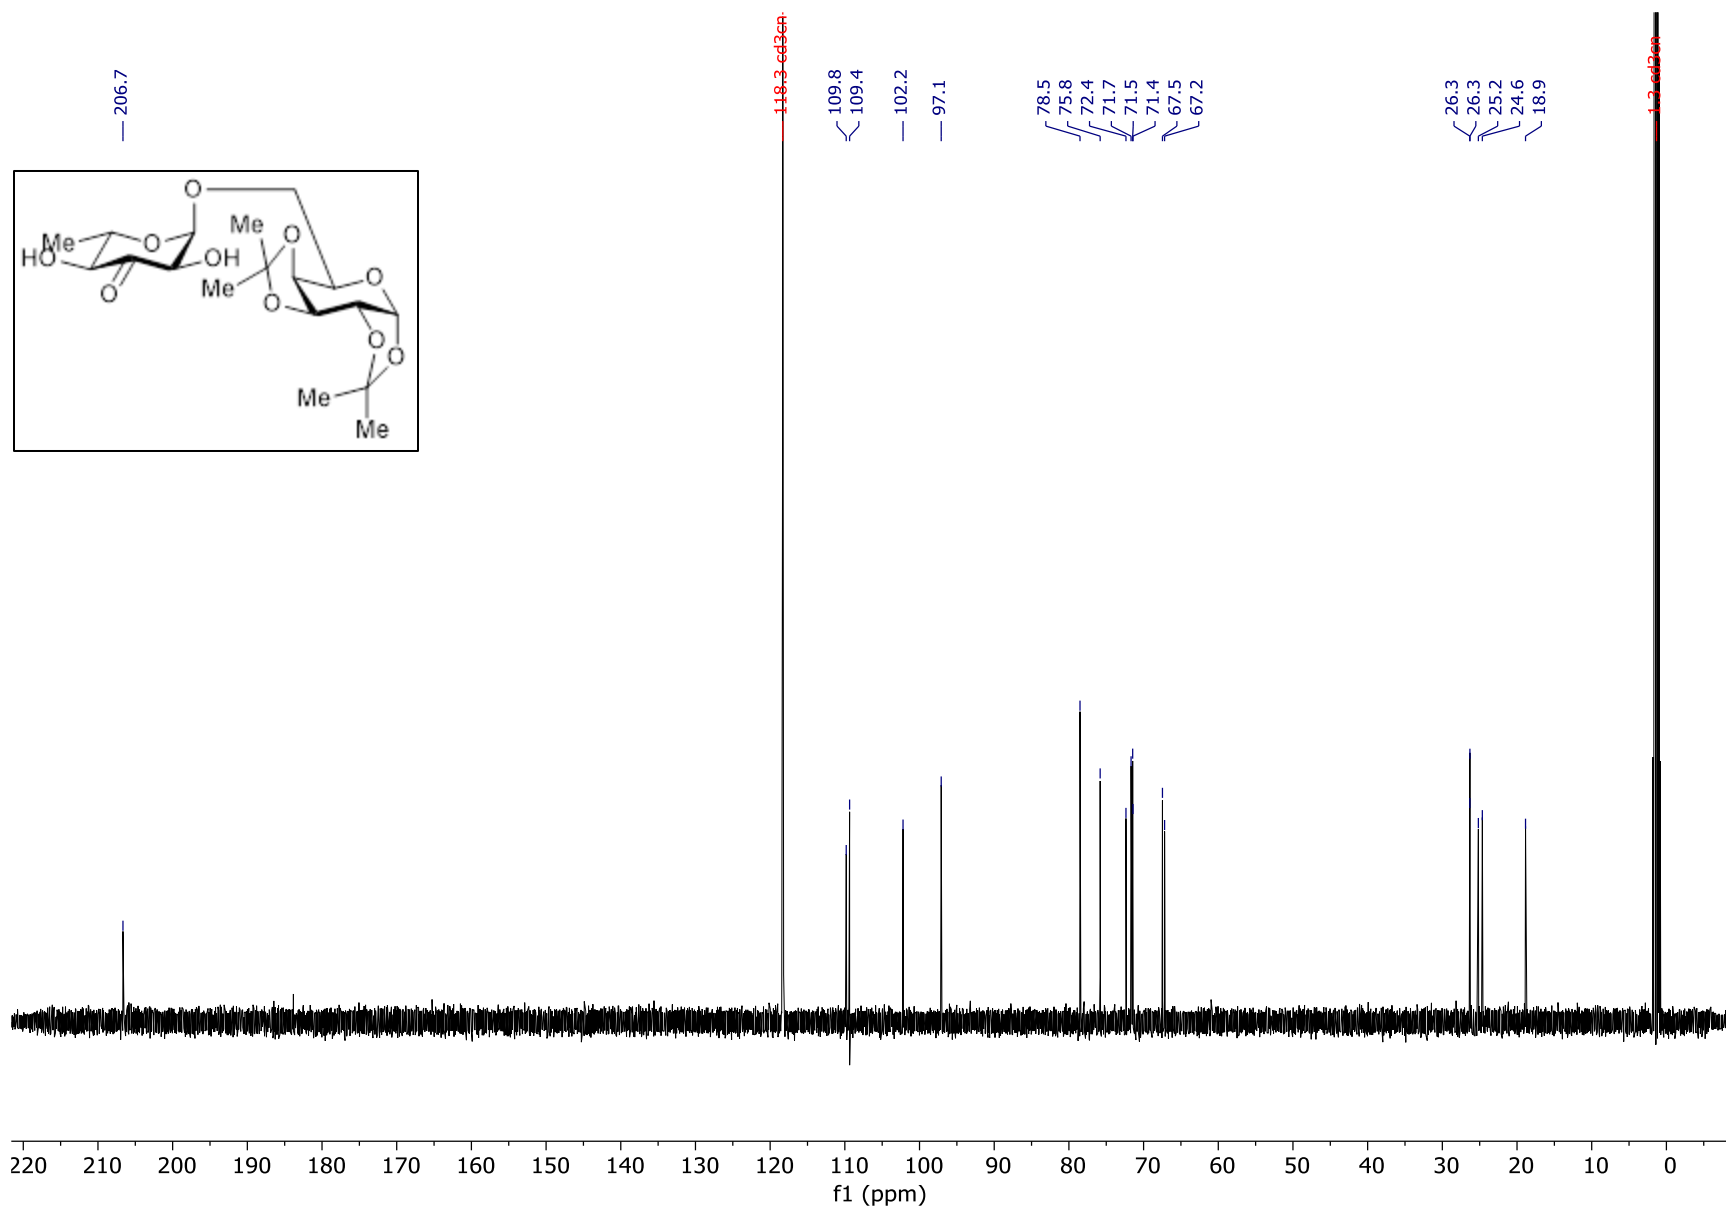



2m – COSY (500 MHz, CD<sub>3</sub>CN)

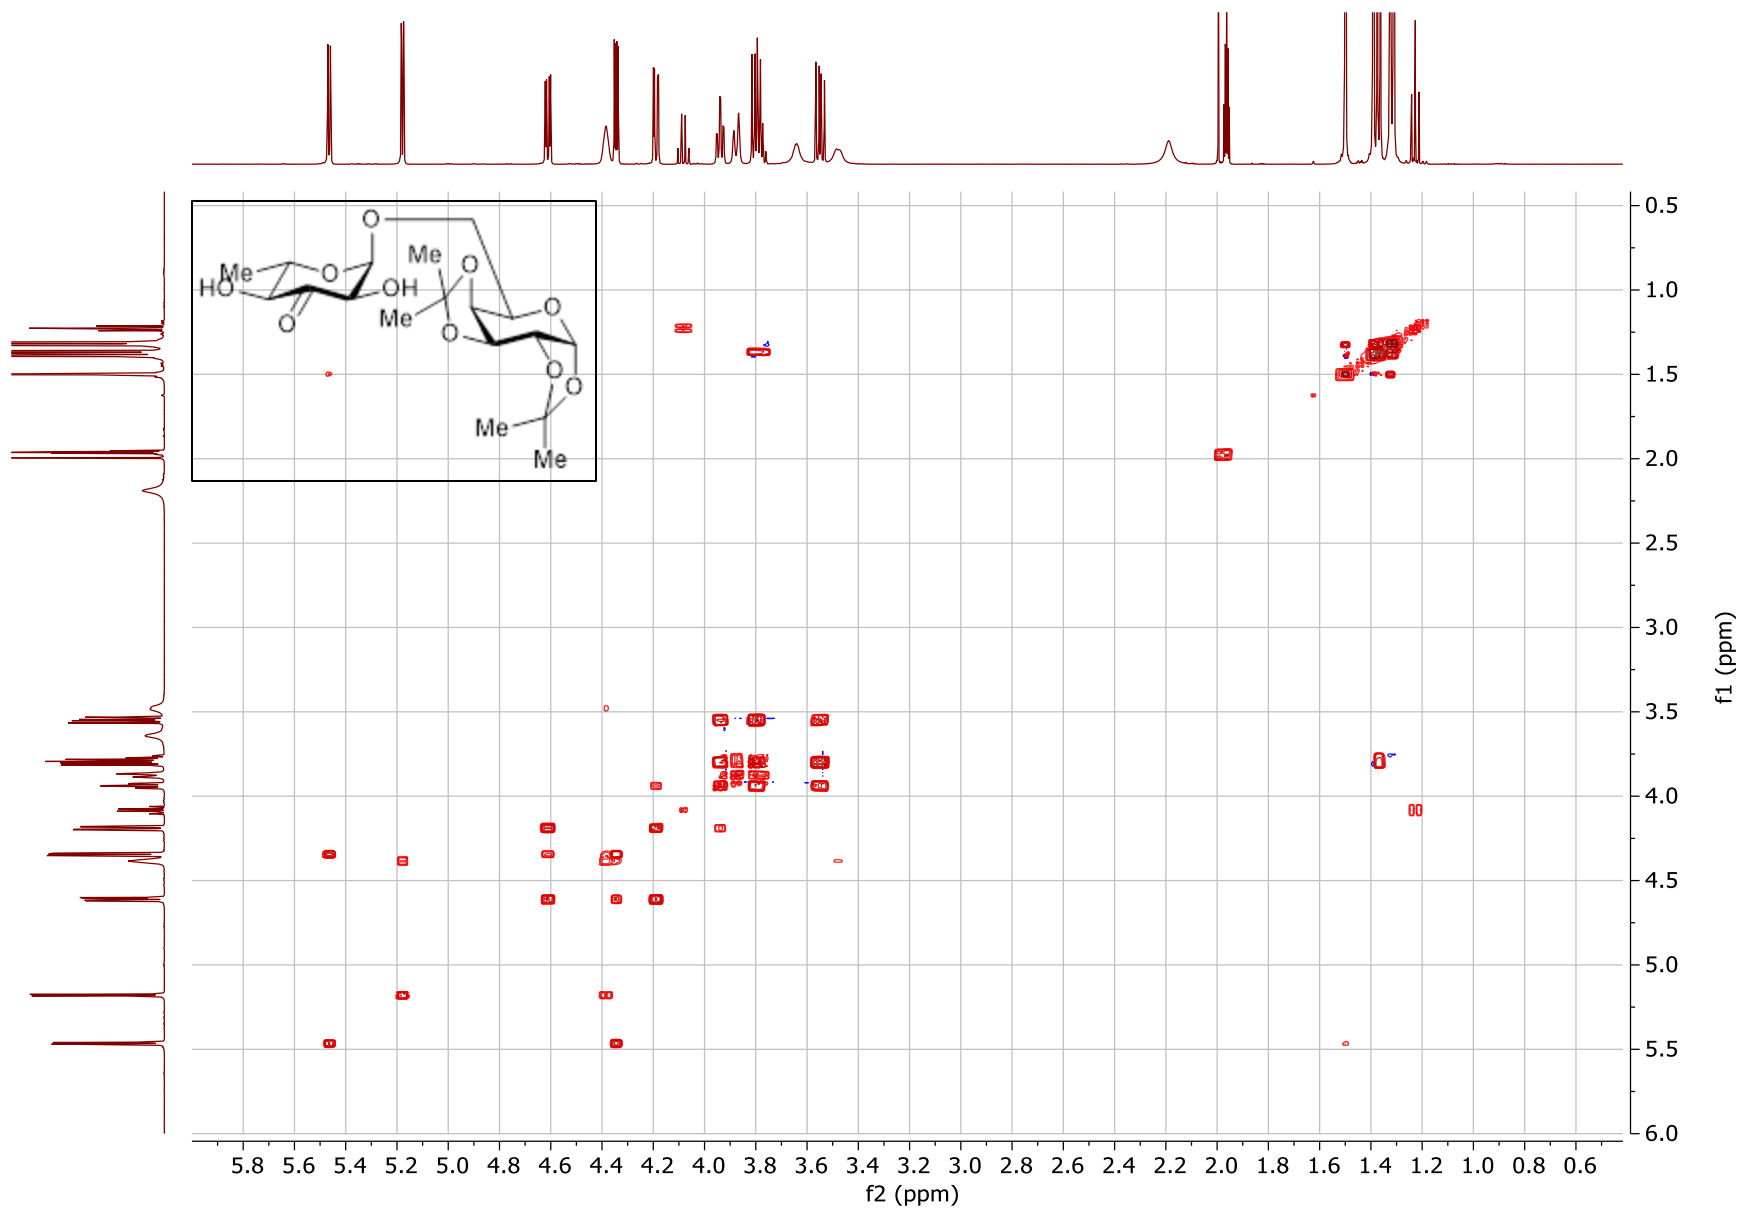

2m – HSQC (500 MHz, CD<sub>3</sub>CN)

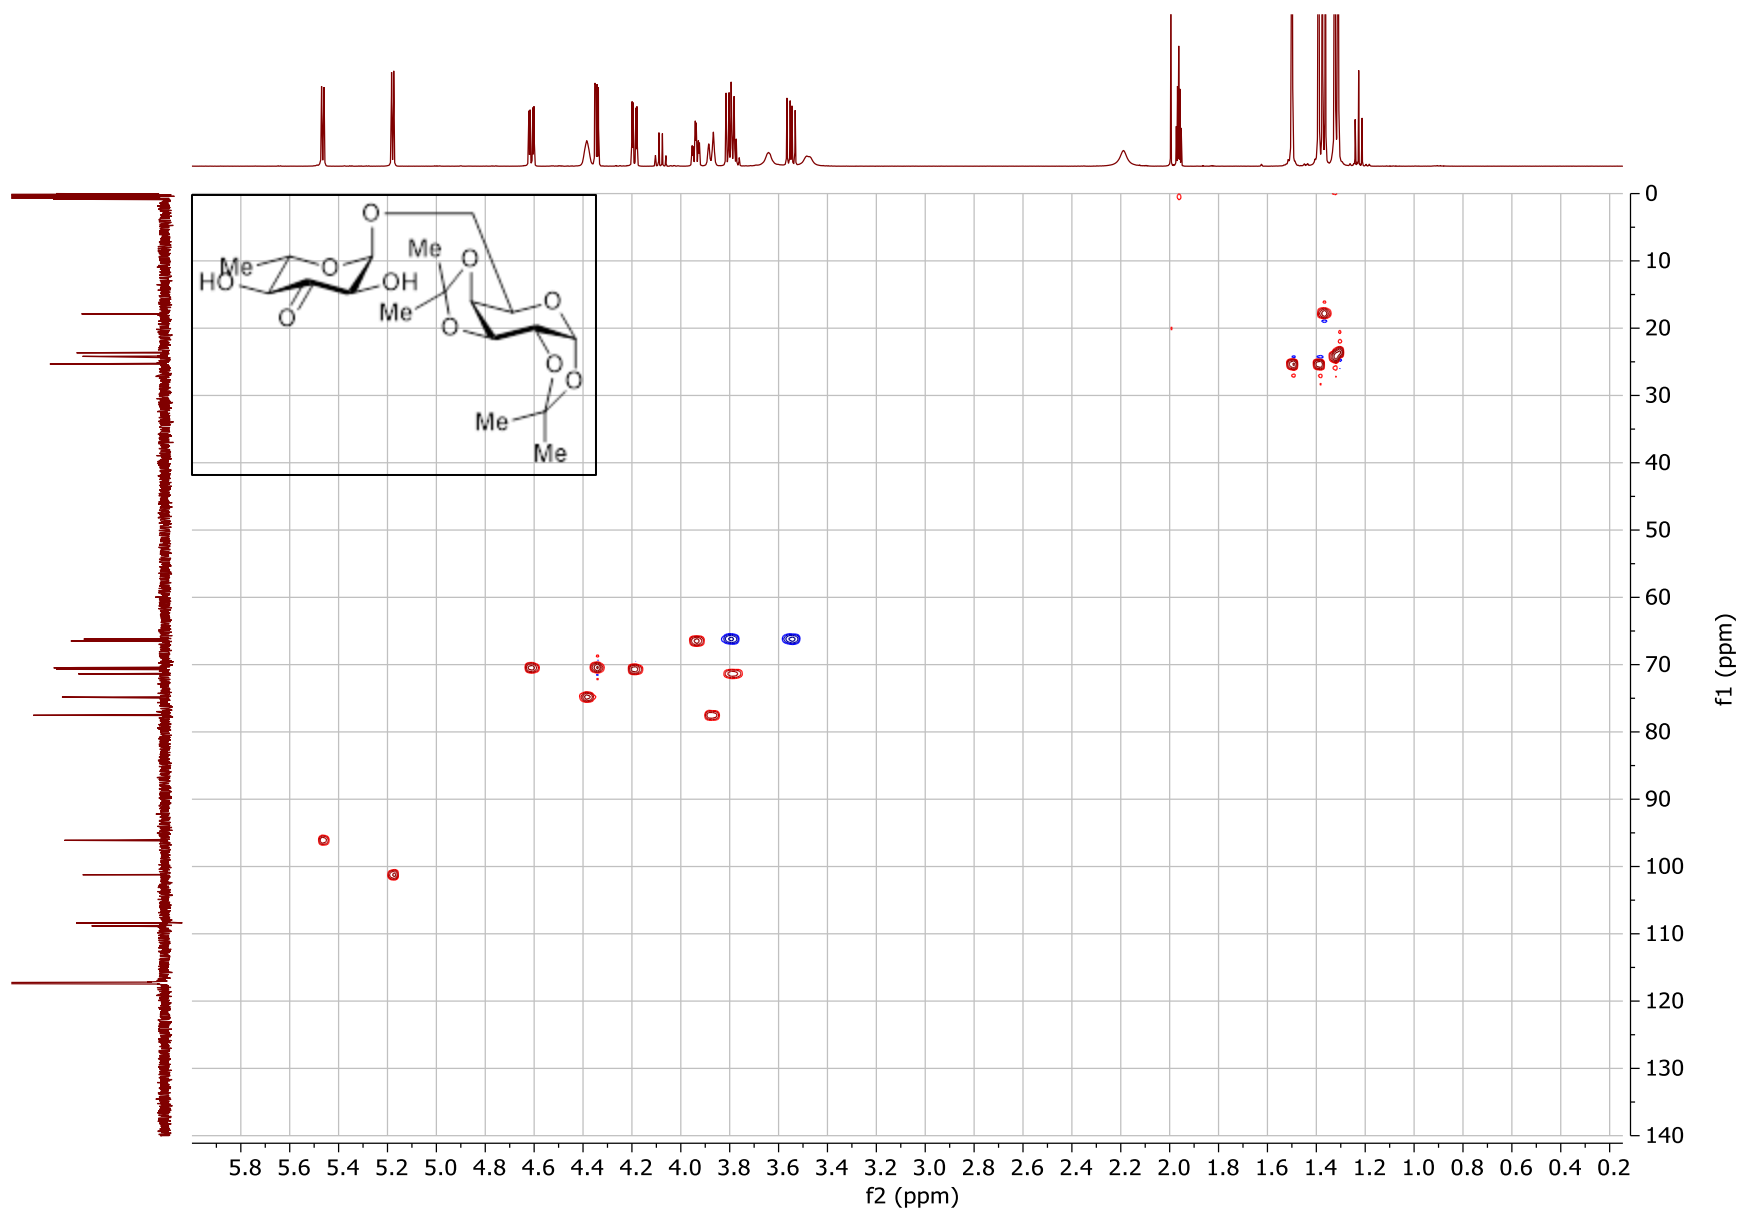

2n - <sup>1</sup>H NMR (500 MHz, CDCl<sub>3</sub>)

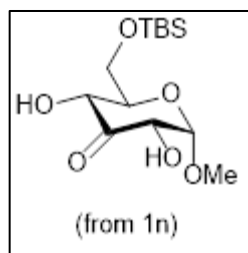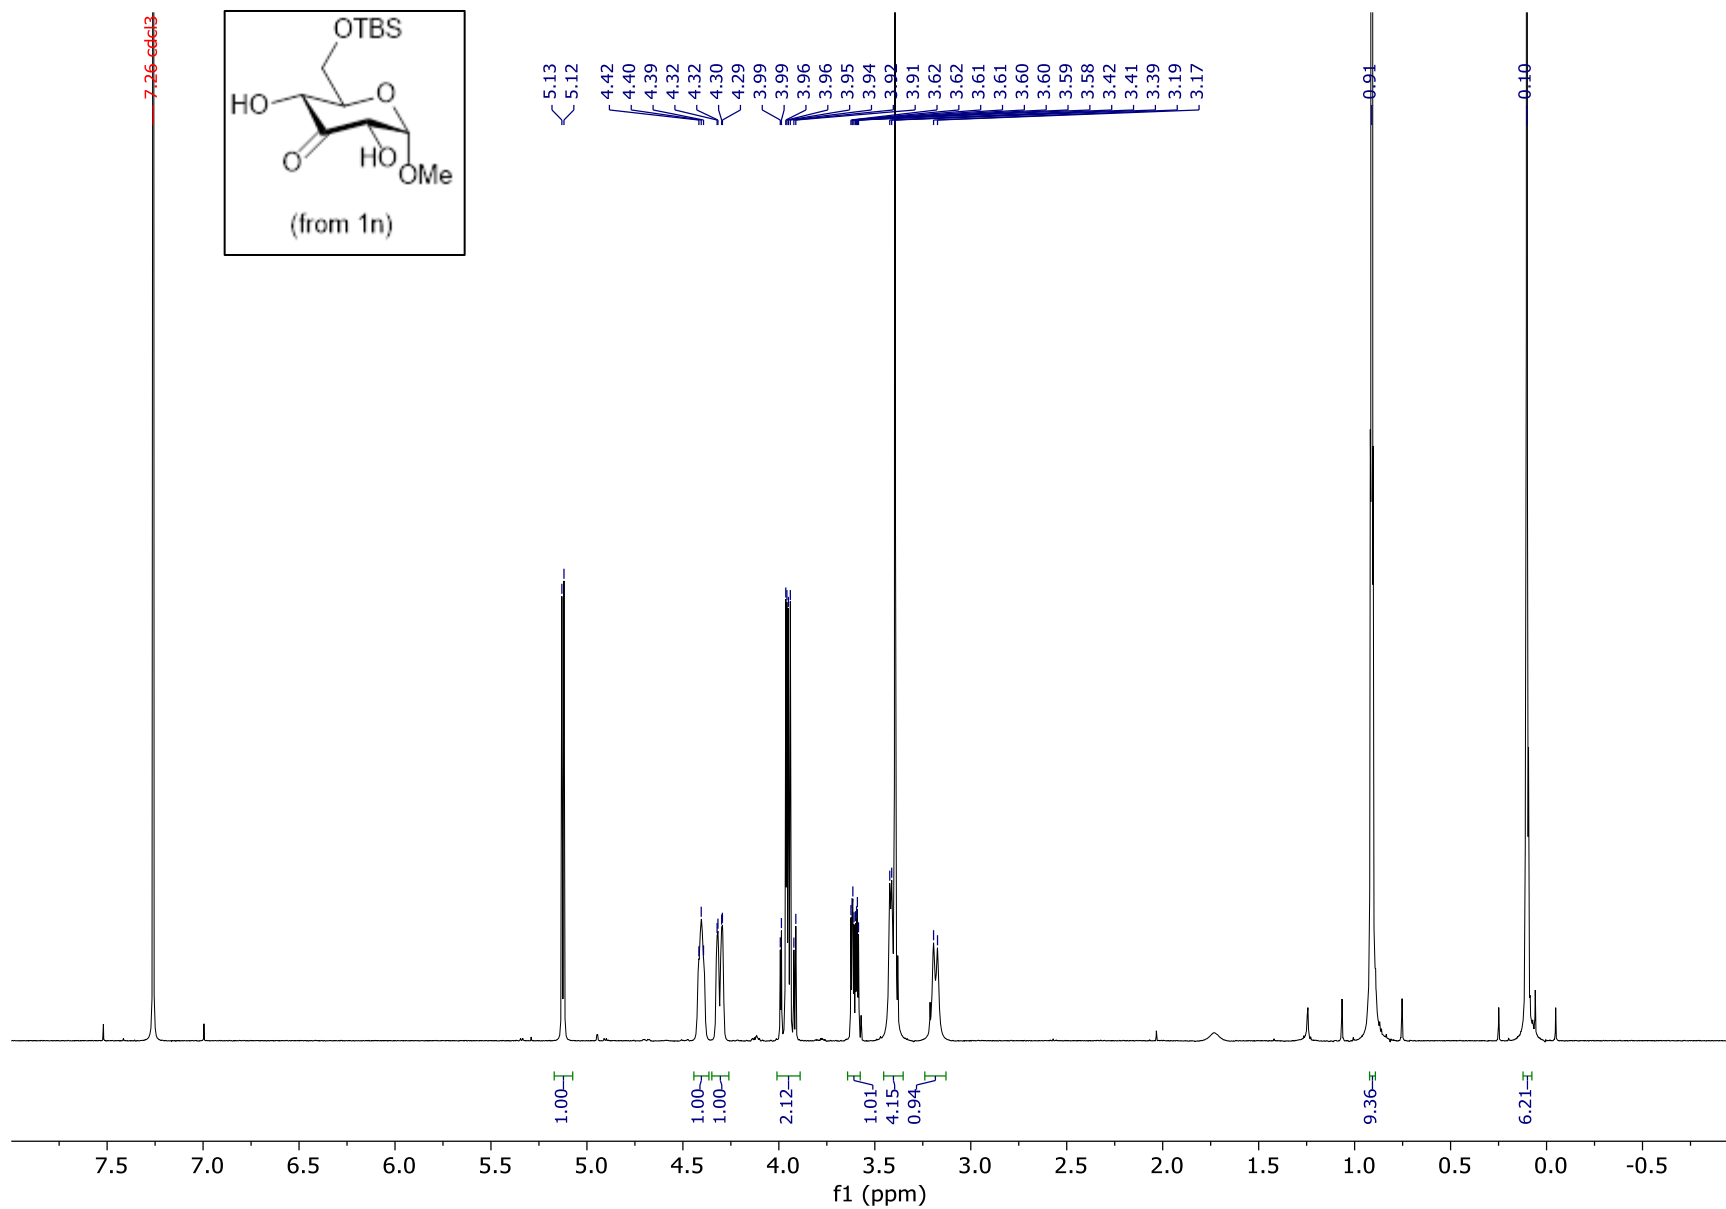

2n – <sup>13</sup>C NMR (126 MHz, CDCl<sub>3</sub>)

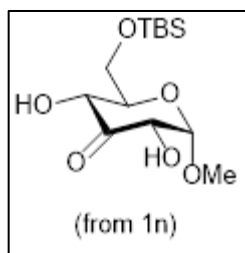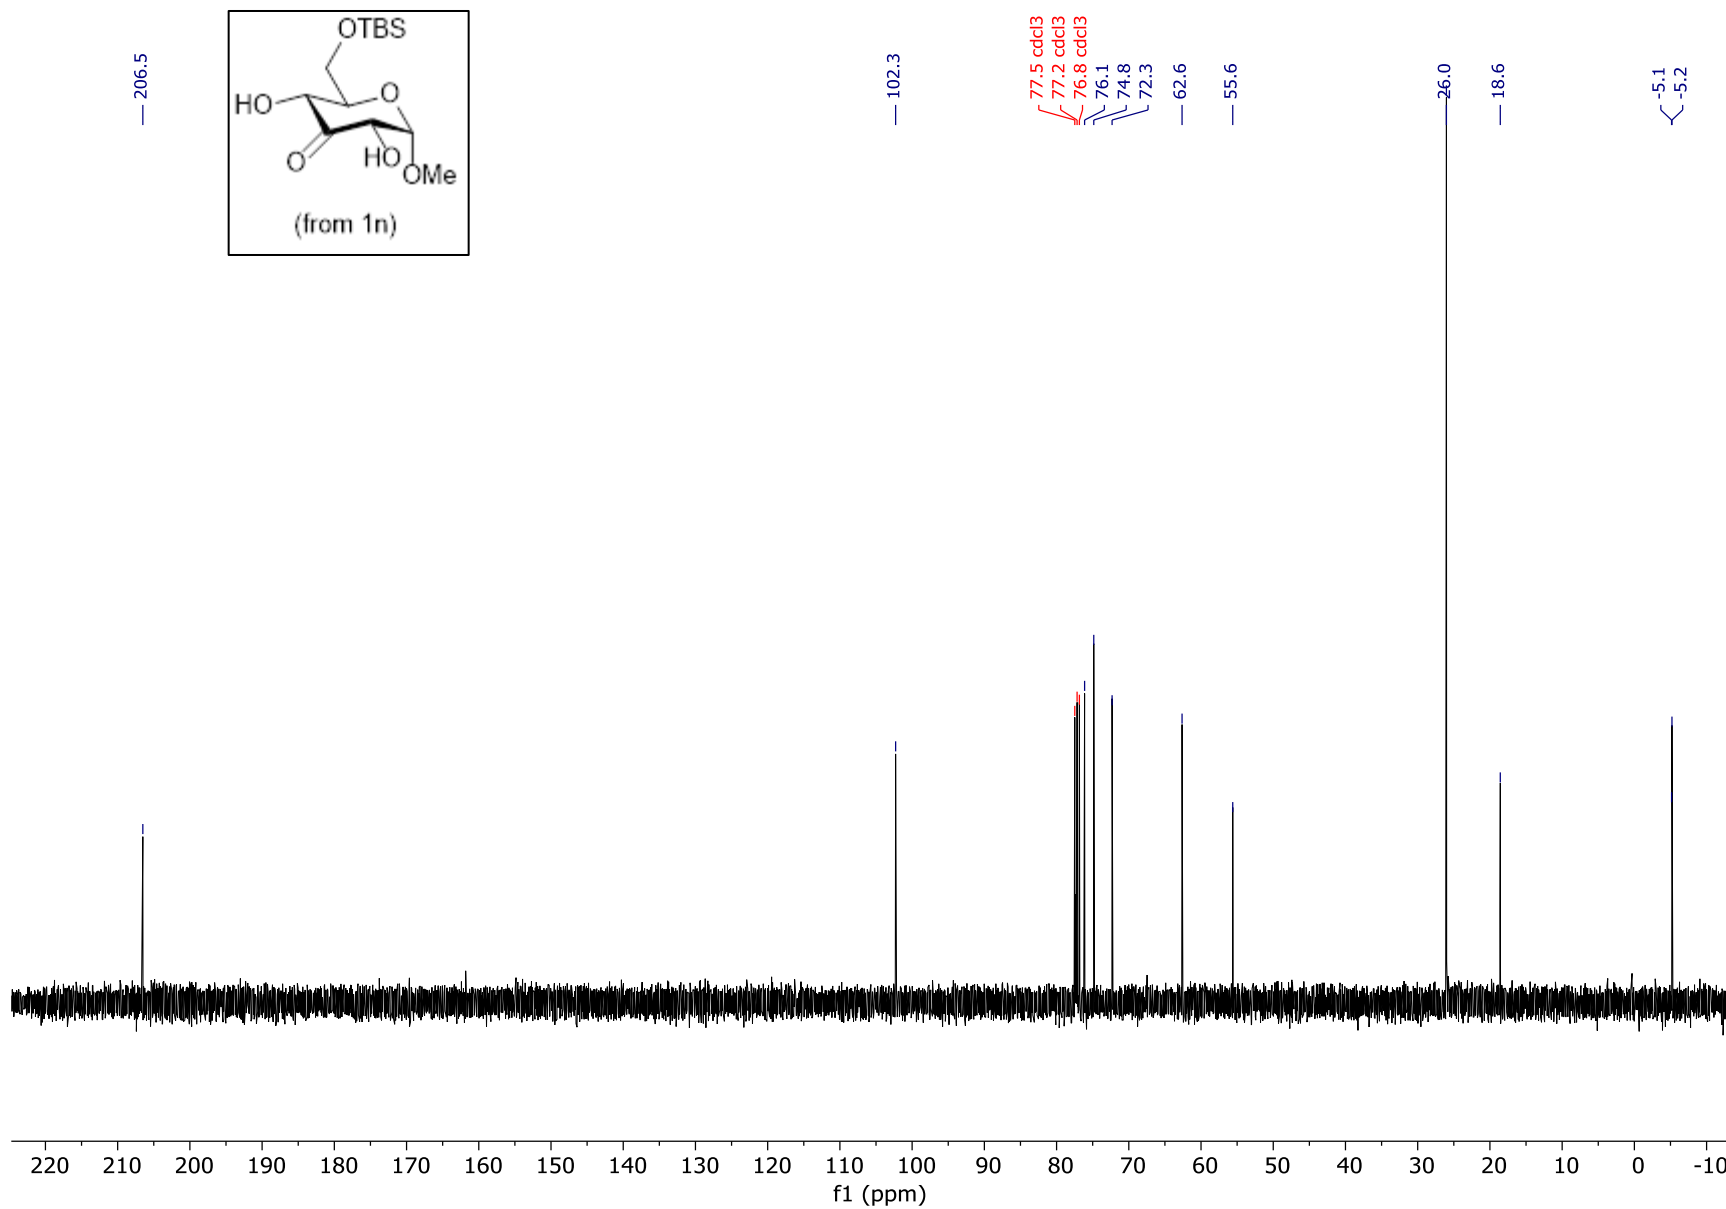

3k – Crude <sup>1</sup>H NMR (500 MHz, CD<sub>3</sub>CN)

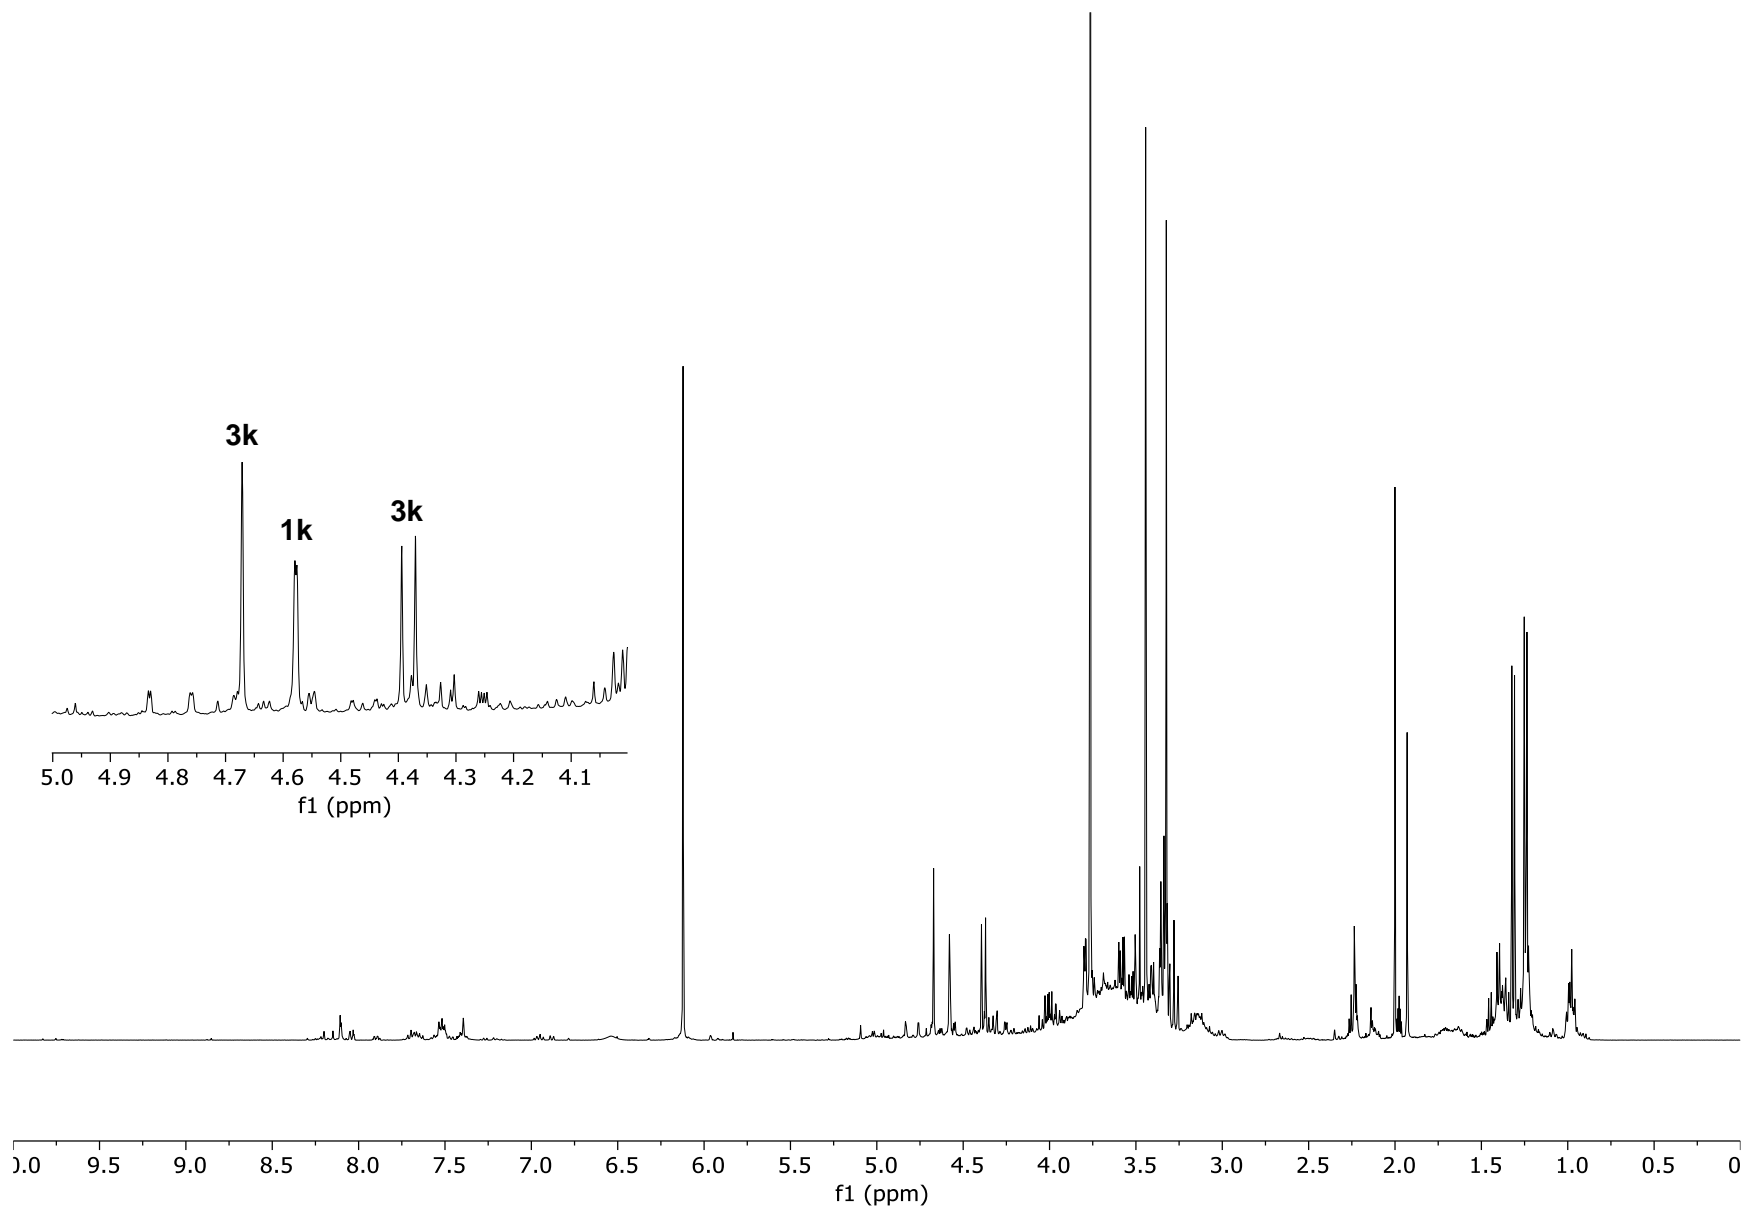

3n – Crude <sup>1</sup>H NMR (500 MHz, CD<sub>3</sub>CN)

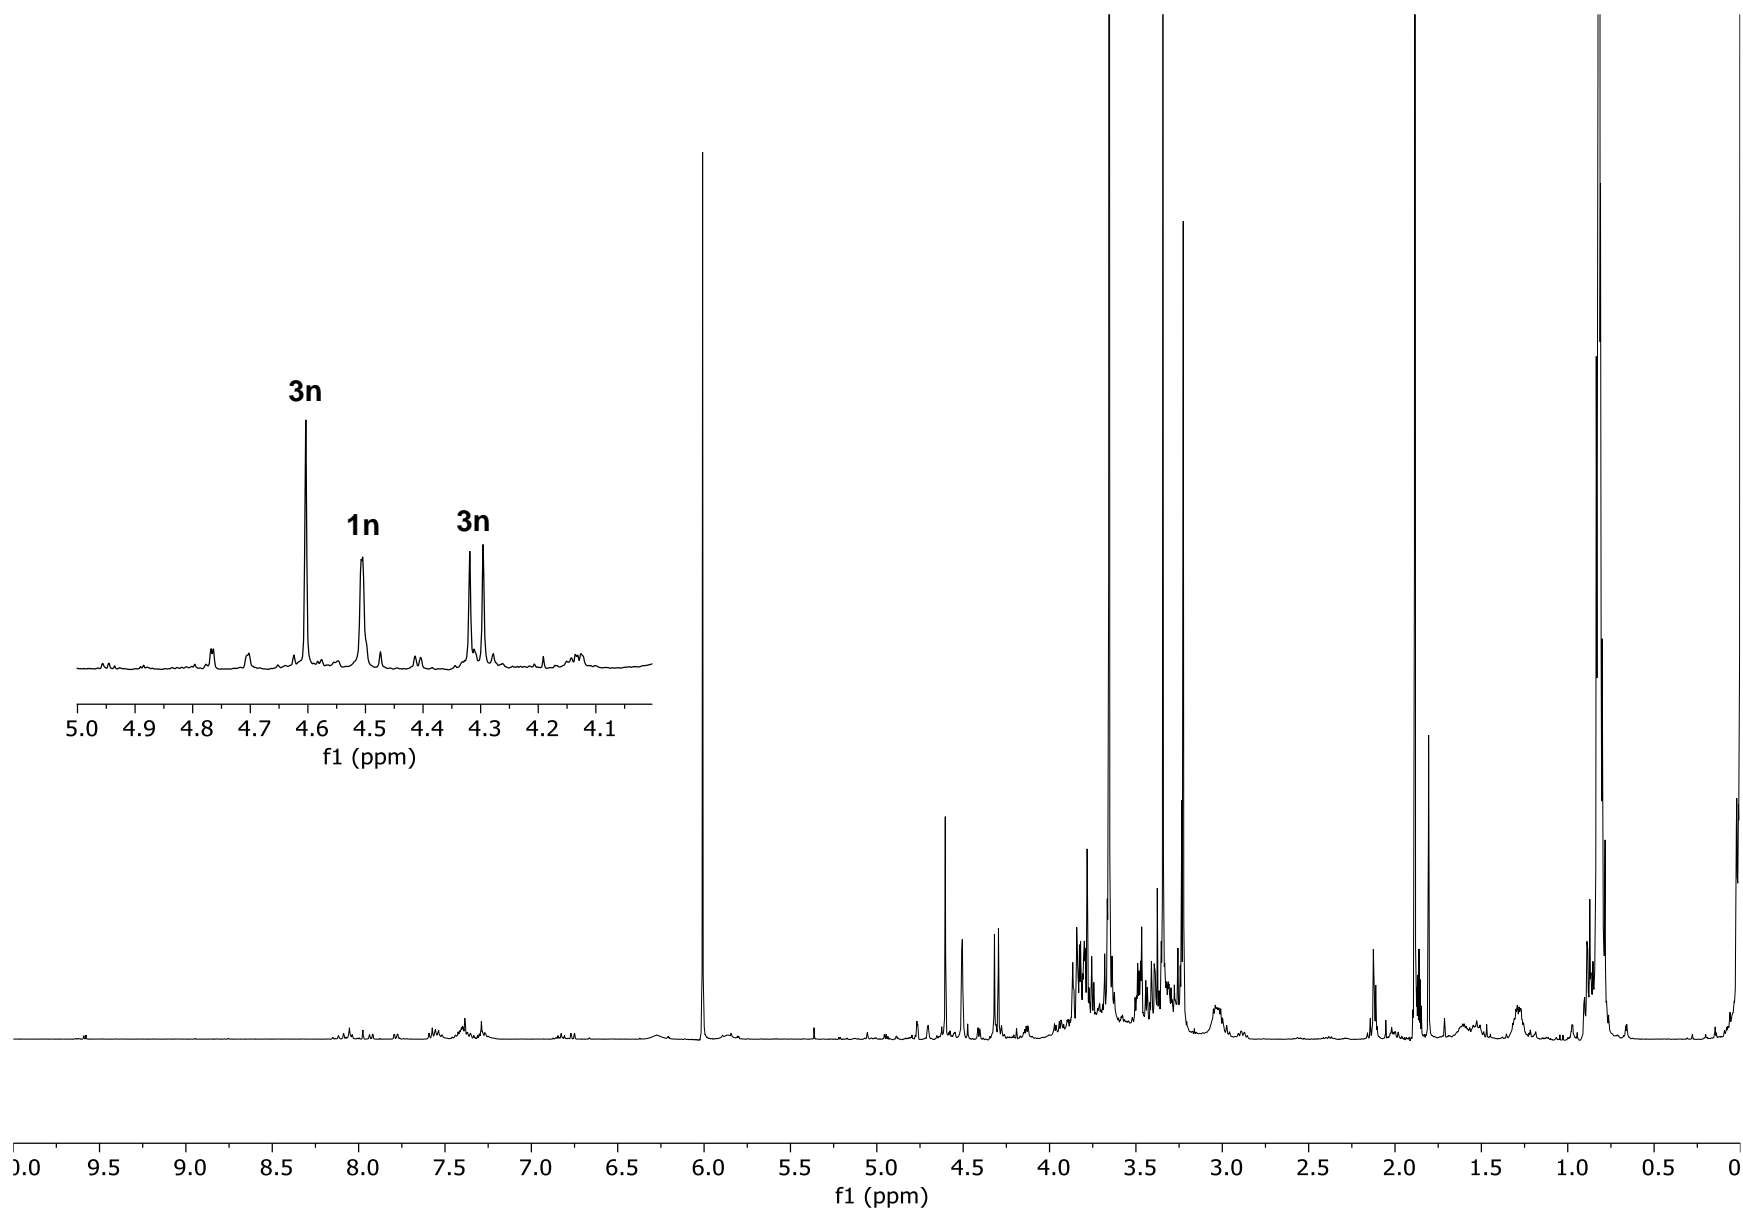

Supplement: d1cc05124e1.pdf [file d1cc05124e1.pdf]
